# Supplementary material for: Millennial changes in North Atlantic oxygen concentrations
Source: Copernicus journal article supplement (doi:10.5194/bg-13-211-2016), 2016-01-15
Supplement: Supplementary file 1 [file bg-13-211-2016-supplement.zip]

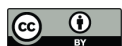

## *Supplement of*

# **Millennial changes in North Atlantic oxygen concentrations**

**B. A. A. Hoogakker et al.**

*Correspondence to:* B. A. A. Hoogakker (babetteh@earth.ox.ac.uk)

- [bg-13-211-2016-supplement-title-page.pdf](#)
- [dataNOAA.xls](#)

The copyright of individual parts of the supplement might differ from the CC-BY 3.0 licence.
