# Supplementary material for: Millennial changes in North Atlantic oxygen concentrations
Source: Copernicus journal article supplement (doi:10.5194/bg-13-211-2016), 2016-01-15
Supplement: Supplementary file 1 [file dataNOAA.xls]

## Sheet: Central Pacific
Water depth (m)	O2 ml/l	O2 umol/kg	d13C of DIC
0.1	4.567	198.205	1.6
0.1	4.599	199.594	1.51
0.2	4.563	198.032	1.52
0.2	4.618	200.419	1.33
0.2	4.625	200.722	1.19
0.2	4.768	206.928	1.39
0.2	4.783	207.579	1.48
0.2	4.809	208.708	1.41
0.2	4.828	209.532	1.14
0.2	4.828	209.532	1.21
0.2	4.876	211.616	1.48
0.2	4.876	211.616	1.56
0.2	4.933	214.089	1.54
0.2	4.938	214.306	1.27
0.2	4.959	215.218	1.46
0.2	4.977	215.999	1.6
0.2	4.984	216.303	1.49
0.2	5.024	218.039	1.56
0.2	5.067	219.905	1.59
0.3	4.489	194.82	1.52
0.3	4.528	196.513	1.26
0.3	4.599	199.594	1.5
0.3	4.638	201.286	1.44
0.4	4.837	209.923	1.53
0.4	5.071	220.078	0.68
0.5	4.563	198.032	1.53
0.5	5.177	224.679	1.35
0.6	4.549	197.424	1.5
0.6	5.143	223.203	1.34
0.79	4.863	211.051	1.48
0.79	5.233	227.109	1.45
0.8	4.333	188.05	1.49
0.8	4.549	197.424	1.48
0.89	4.823	209.315	1.44
0.99	4.574	198.509	1.5
1.19	5.656	245.467	1.6
1.29	5.899	256.013	1.7
1.39	5.866	254.581	1.82
1.39	6.727	291.948	1.96
1.49	5.706	247.637	1.77
1.49	6.019	261.221	1.87
1.59	4.37	189.655	1.63
1.59	6.016	261.091	1.86
1.59	6.502	282.183	1.81
1.68	7.037	305.402	1.39
1.69	4.342	188.44	1.65
1.69	7.657	332.309	-0.21
1.79	6.096	264.563	1.68
1.89	4.42	191.825	1.76
1.89	4.517	196.035	1.46
1.98	6.89	299.022	1.53
1.99	5.187	225.113	1.26
2.08	6.408	278.103	1.77
2.08	6.64	288.172	1.57
2.08	6.846	297.112	2.06
2.08	7.865	341.336	1.76
2.28	5.958	258.574	1.84
2.28	7.129	309.394	1.42
2.28	7.259	315.036	1.7
2.29	4.743	205.843	1.41
2.38	6.039	262.089	1.7
2.48	4.774	207.189	1.55
2.48	6.307	273.72	1.75
2.49	4.418	191.739	1.69
2.58	4.607	199.941	1.65
2.58	6.029	261.655	1.65
2.68	7.073	306.964	2.2
2.77	7.035	305.315	2.23
2.77	7.597	329.705	1.21
2.78	4.976	215.955	1.61
2.78	5.052	219.254	1.41
2.78	5.21	226.111	1.39
2.78	5.522	239.652	1.52
2.78	6.041	262.176	1.7
2.78	7.136	309.698	1.42
2.88	4.792	207.97	1.69
2.88	5.869	254.711	1.57
2.88	5.921	256.968	1.71
2.97	7.025	304.881	1.35
2.98	4.533	196.73	1.48
2.98	4.609	200.028	1.32
2.98	6.026	261.525	1.7
2.98	6.702	290.863	1.68
3.08	4.838	209.966	1.6
3.17	6.619	287.261	1.54
3.17	7.064	306.573	1.42
3.17	7.078	307.181	1.4
3.18	4.368	189.569	1.42
3.27	6.922	300.411	1.51
3.37	6.445	279.709	1.86
3.38	4.558	197.815	1.54
3.47	5.983	259.659	1.59
3.68	4.505	195.514	1.58
3.78	4.549	197.424	1.61
3.98	4.731	205.323	1.76
4.07	5.008	217.344	1.35
4.08	4.462	193.648	1.59
4.18	4.793	208.013	1.63
4.38	4.506	195.558	1.71
4.47	4.989	216.52	1.79
4.48	4.957	215.131	1.46
4.87	5.037	218.603	1.33
4.97	4.917	213.395	1.8
5.07	4.943	214.523	0.01
5.07	5.047	219.037	1.08
5.16	6.895	299.239	1.6
5.27	4.462	193.648	1.6
5.27	4.517	196.035	1.58
5.27	4.869	211.312	1.68
5.37	5.131	222.682	1.55
5.47	4.582	198.856	1.63
5.67	4.635	201.156	1.32
5.77	5.021	217.908	1.77
5.87	4.904	212.831	1.61
5.96	5.747	249.416	1.58
5.97	4.952	214.914	1.5
6.36	4.807	208.621	1.56
6.46	4.535	196.816	1.56
6.46	4.613	200.202	1.42
6.66	4.505	195.514	1.6
6.76	4.464	193.735	1.67
6.86	4.883	211.919	1.56
6.86	4.909	213.048	1.47
6.95	5.224	226.719	1.4
7.04	7.209	312.866	0.81
7.16	4.894	212.397	-2.18
7.16	4.947	214.697	1.49
7.26	4.92	213.525	1.43
7.46	4.455	193.344	1.51
7.46	4.89	212.223	1.47
7.55	5.123	222.335	1.24
7.73	7.354	319.159	0.97
7.76	4.478	194.343	1.36
7.96	4.498	195.211	1.65
8.04	6.605	286.653	1.54
8.05	4.931	214.003	1.61
8.06	4.416	191.652	1.71
8.33	6.794	294.856	1.62
8.53	6.13	266.038	1.51
8.54	5.843	253.583	1.48
8.75	4.558	197.815	1.55
8.84	4.932	214.046	1.3
9.05	4.505	195.514	1.58
9.05	4.613	200.202	1.76
9.45	4.505	195.514	1.66
9.55	4.581	198.813	1.5
9.72	5.706	247.637	1.99
9.92	5.722	248.331	1.95
9.94	4.63	200.939	1.31
10.04	4.42	191.825	1.81
10.23	5.396	234.183	1.69
10.24	4.537	196.903	1.47
10.24	4.891	212.267	1.45
10.41	6.587	285.872	1.74
10.42	6.116	265.431	2.13
10.51	5.959	258.617	1.92
10.53	5.311	230.494	1.49
10.61	6.019	261.221	2.04
10.71	6.594	286.176	1.77
10.74	4.537	196.903	1.52
10.74	4.558	197.815	1.49
10.8	6.419	278.581	1.53
10.82	5.775	250.632	2.02
11.01	6.408	278.103	1.95
11.01	6.624	287.478	2.05
11.1	6.332	274.805	1.66
11.24	4.549	197.424	1.58
11.32	5.308	230.364	1.49
11.41	5.548	240.78	1.88
11.5	6.737	292.382	1.74
11.61	5.451	236.57	1.84
11.63	4.694	203.717	1.58
11.79	6.383	277.018	1.82
11.93	4.28	185.75	1.45
13.13	4.345	188.57	1.45
15.12	4.609	200.028	1.48
18.3	4.441	192.737	1.43
18.4	4.558	197.815	1.49
18.5	4.494	195.037	1.57
18.89	4.409	191.348	1.78
19.39	4.446	192.954	1.74
19.67	4.881	211.833	1.37
19.79	4.45	193.127	1.64
19.89	4.547	197.337	1.48
19.99	4.637	201.243	1.34
20.29	4.542	197.12	1.46
20.29	4.605	199.854	1.33
20.48	4.628	200.853	1.64
22.15	5.106	221.597	1.42
22.22	5.872	254.841	1.97
24.63	5.446	236.353	1.49
24.89	7.112	308.657	1.63
24.9	5.743	249.243	1.99
24.92	5.421	235.268	1.72
25.18	7.158	310.653	1.49
25.19	6.583	285.698	2.09
25.32	5.504	238.87	1.33
25.4	6.21	269.51	2.02
25.49	6.606	286.697	2.07
25.67	6.355	275.803	1.66
25.67	6.41	278.19	1.6
25.81	5.534	240.172	1.86
25.84	4.86	210.921	1.79
25.86	6.679	289.865	1.6
25.87	6.373	276.584	1.81
25.88	7.015	304.447	1.55
26.38	7.204	312.649	1.92
27.54	4.467	193.865	1.63
27.64	6.901	299.499	1.48
28.29	5.557	241.171	1.45
28.93	7.147	310.176	1.02
29.13	6.539	283.789	1.16
29.48	5.929	257.315	1.81
29.53	4.554	197.641	1.52
29.53	4.558	197.815	1.47
29.63	4.517	196.035	1.72
29.72	6.218	269.858	1.09
29.83	4.542	197.12	1.4
29.93	7.195	312.259	1.41
30.01	4.922	213.612	1.54
30.11	4.802	208.404	1.47
30.27	5.988	259.876	1.88
30.7	4.74	205.713	1.44
30.75	6.484	281.402	1.78
30.86	6.08	263.868	1.74
31.04	6.8	295.116	1.67
31.27	5.935	257.576	1.69
31.37	5.706	247.637	1.19
31.52	7.064	306.573	1.42
31.55	6.378	276.801	1.33
31.81	4.779	207.406	1.62
32.42	6.989	303.319	1.42
32.5	7.217	313.214	1.5
32.65	5.887	255.492	1.58
32.81	5.058	219.514	1.52
33.19	7.335	318.335	0.67
33.21	4.876	211.616	1.58
34.39	7.218	313.257	0.71
34.98	7.198	312.389	1.42
36.3	4.554	197.641	1.49
36.3	4.814	208.925	1.37
37.19	4.232	183.666	1.35
38.28	4.476	194.256	1.62
38.57	4.973	215.825	1.4
38.58	4.411	191.435	1.79
38.68	4.437	192.563	1.42
38.98	4.508	195.645	1.43
39.28	4.531	196.643	1.44
39.31	6.348	275.499	1.32
40.17	4.416	191.652	1.61
40.17	4.526	196.426	1.45
40.24	5.086	220.729	1.34
41.47	4.805	208.534	1.36
41.65	4.959	215.218	1.45
41.85	6.865	297.937	1.02
42.25	5.019	217.822	1.41
44.05	4.591	199.247	1.31
44.33	4.899	212.614	1.64
44.65	4.63	200.939	1.33
44.65	4.917	213.395	1.48
45.54	4.556	197.728	1.4
45.64	4.565	198.118	1.72
46.03	4.915	213.308	1.78
46.29	5.196	225.503	1.39
46.84	4.858	210.834	1.35
47.13	5.019	217.822	1.34
47.52	4.975	215.912	1.69
47.93	4.033	175.03	1.19
48.33	4.473	194.126	1.38
48.34	6.148	266.82	1.71
48.52	4.869	211.312	1.7
48.89	4.916	213.352	1.36
49.02	4.853	210.617	1.55
49.42	4.434	192.433	1.68
49.51	4.708	204.324	1.72
49.72	4.416	191.652	1.78
49.85	5.757	249.85	1.4
50.17	6.937	301.062	1.33
50.36	7.123	309.134	1.1
50.48	6.891	299.065	1.62
50.5	6.783	294.378	1.96
50.5	6.868	298.067	1.94
50.56	7.105	308.353	1.16
50.61	6.486	281.489	1.85
50.69	6.702	290.863	1.68
50.73	6.15	266.906	1.58
50.75	7.128	309.351	0.92
50.76	7.001	303.839	1.38
50.81	4.097	177.807	1.56
50.88	6.932	300.845	1.52
50.92	7.062	306.487	0.85
50.94	5.27	228.715	1.3
50.94	7.123	309.134	0.7
51.04	5.789	251.239	1.42
51.11	4.669	202.632	1.27
51.13	6.946	301.452	0.88
51.19	6.751	292.989	1.73
51.23	6.967	302.364	1.22
51.51	4.407	191.261	1.39
52.8	4.251	184.491	1.35
53.19	6.192	268.729	1.84
53.38	4.494	195.037	1.63
53.49	4.526	196.426	1.71
53.6	6.498	282.009	1.23
54.24	4.959	215.218	1.41
54.24	6.931	300.801	1.5
54.45	4.929	213.916	1.5
54.45	5.258	228.194	1.43
54.49	6.511	282.574	1.25
54.9	7.005	304.013	1.08
54.97	3.618	157.019	0.2
55.25	4.897	212.527	1.49
55.38	4.174	181.149	1.12
55.48	6.911	299.933	1.35
55.55	6.44	279.492	1.71
55.66	6.078	263.782	1.75
55.67	6.059	262.957	1.77
55.84	6.704	290.95	1.56
56	7.06	306.4	1.5
56.45	4.729	205.236	1.7
56.48	4.929	213.916	1.65
56.48	5.545	240.65	1.54
56.88	4.917	213.395	1.45
56.94	6.346	275.413	1.64
57.07	6.082	263.955	1.73
57.28	4.29	186.183	1.43
57.37	4.06	176.202	1.55
57.37	6.84	296.852	1.2
57.47	4.03	174.9	1.26
57.97	4.94	214.393	1.63
58.15	5.228	226.892	1.55
58.17	4.175	181.193	1.53
58.26	4.982	216.216	1.78
58.36	4.683	203.239	1.37
58.67	4.347	188.657	1.28
58.87	4.947	214.697	1.48
59.46	4.388	190.437	1.18
59.8	5.138	222.986	1.4
60.15	7.175	311.391	1.23
60.26	4.508	195.645	1.45
60.49	5.293	229.713	1.19
60.93	7.342	318.639	0.73
61.05	7.237	314.082	1.15
61.11	4.935	214.176	1.45
61.63	5.919	256.881	1.5
61.83	5.03	218.299	1.5
63.03	7.214	313.083	0.91
65.11	6.194	268.816	1.15
65.43	4.425	192.042	1.36
65.53	4.464	193.735	1.31
66.02	3.096	134.365	0.16
66.62	3.949	171.384	1.19
67.11	4.721	204.889	1.63
67.62	4.425	192.042	1.24
68	5.446	236.353	1.23
69.37	4.678	203.022	1.48
70.6	4.621	200.549	1.32
71.28	5.704	247.55	1.65
71.49	4.432	192.346	1.25
72.13	4.909	213.048	1.47
72.39	3.563	154.632	1.07
73.48	4.082	177.156	1.13
73.89	6.449	279.883	1.43
73.9	5.371	233.098	1.55
74.14	5.322	230.972	1.47
74.28	3.135	136.057	0.9
74.9	6.256	271.507	1.64
74.94	6.169	267.731	1.54
74.97	5.718	248.158	1.38
75.04	5.731	248.722	1.53
75.19	6.327	274.588	1.5
75.27	4.736	205.54	1.33
75.33	7.047	305.836	0.96
75.34	7.054	306.139	1.13
75.35	5.925	257.142	1.56
75.38	5.527	239.869	1.39
75.4	6.304	273.59	1.52
75.46	6.879	298.545	1.21
75.57	5.635	244.556	1.26
75.75	4.076	176.896	0.92
75.77	4.947	214.697	1.36
75.9	5.945	258.01	0.45
75.92	6.125	265.821	1.67
75.97	4.315	187.268	1.27
76.02	7.036	305.358	0.82
76.08	6.47	280.794	1.45
76.16	6.741	292.555	1.34
76.24	6.925	300.541	1.19
76.26	4.756	206.408	1.38
76.3	6.054	262.74	0.54
76.31	6.971	302.537	0.61
76.6	6.137	266.342	1.5
76.66	3.432	148.947	0.92
76.88	7.041	305.575	0.81
76.96	3.773	163.746	1.42
76.96	4	173.598	1.06
76.97	5.926	257.185	0.97
77.16	3.415	148.209	1.03
77.21	5.198	225.59	1.53
77.56	3.982	172.816	1.26
77.66	3.213	139.442	0.82
77.76	3.505	152.115	1.2
77.89	5.233	227.109	1.36
78.15	6.677	289.778	1.18
78.22	6.077	263.738	1.72
78.35	3.211	139.356	1.06
78.65	4.791	207.927	1.39
78.75	4.448	193.041	1.36
78.86	6.709	291.167	1.33
78.9	4.657	202.111	1.33
78.92	6.768	293.727	1.37
79.14	4.501	195.341	1.72
79.45	6.447	279.796	1.69
79.47	4.974	215.869	0.43
79.55	5.607	243.341	0.86
79.88	2.921	126.77	0.1
80.03	5.607	243.341	1.49
80.38	5.579	242.125	1.38
80.54	4.922	213.612	1.47
80.62	5.561	241.344	1.13
80.74	6.778	294.161	1.23
80.79	4.48	194.429	1.37
80.85	6.052	262.653	1.57
80.86	5.98	259.529	1.6
80.86	6.185	268.425	1.62
81.07	7.071	306.877	1.21
81.42	6.658	288.953	1.49
81.58	5.965	258.878	1.66
81.63	3.53	153.2	0.81
81.7	4.841	210.097	1.63
81.84	7.344	318.725	0.62
82.02	4.922	213.612	1.79
82.17	5.928	257.272	1.57
82.44	5.419	235.181	0.6
83.41	4.467	193.865	1.09
83.96	5.228	226.892	1.36
84.02	2.786	120.911	0.68
84.32	3.015	130.849	0.85
84.32	6.055	262.783	0.77
84.59	4.943	214.523	1.8
84.9	4.999	216.954	1.64
85.31	4.924	213.699	1.27
85.46	6.127	265.908	1.72
85.74	5.97	259.095	1.64
86.43	4.997	216.867	1.49
86.68	2.841	123.298	0.36
86.9	2.867	124.426	0.93
86.9	3.036	131.761	0.81
86.9	3.493	151.594	1.18
87.29	4.039	175.29	1.22
87.67	4.982	216.216	1.77
88.16	5.078	220.382	1.55
88.79	3.282	142.437	1.11
89.64	5.43	235.659	1.52
90.68	4.467	193.865	1.32
91.17	0.729	31.6382	0.06
91.57	4.276	185.576	1.21
92.07	2.944	127.768	0.66
92.76	4.524	196.339	1.38
93.05	3.94	170.994	1.38
93.46	4.377	189.959	1.23
93.86	3.344	145.128	0.94
94.61	4.506	195.558	1.38
95.33	3.671	159.319	0.82
95.64	5.292	229.67	1.3
95.65	4.154	180.281	1.23
95.75	1.97	85.4969	0.48
96.34	4.922	213.612	1.38
96.44	2.596	112.665	0.71
96.44	4.039	175.29	1.04
96.88	6.943	301.322	0.91
97.23	4.964	215.435	1.33
97.33	4.547	197.337	1.5
97.34	3.714	161.185	1.1
97.7	6.412	278.277	1.31
97.84	2.821	122.43	0.83
97.84	3.245	140.831	1.05
98.23	3.179	137.967	0.87
99.03	4.639	201.33	1
99.11	4.531	196.643	1.71
99.34	4.827	209.489	1.08
99.53	1.18	51.2113	0.29
99.53	3.321	144.129	1.12
99.69	3.328	144.433	-0.15
100.12	7.054	306.139	1.06
100.16	5.842	253.539	1.51
100.18	6.268	272.028	0.75
100.24	6.481	281.272	0.85
100.29	6.555	284.483	0.14
100.39	5.518	239.478	1.3
100.4	6.233	270.509	1.58
100.41	6.861	297.763	0.86
100.42	5.897	255.926	1.52
100.44	6.907	299.76	1.11
100.46	4.937	214.263	1.28
100.52	6.962	302.147	1.13
100.59	6.205	269.293	1.51
100.74	5.975	259.312	0.9
100.75	5.86	254.321	1.44
100.82	5.841	253.496	1.37
100.98	4.333	188.05	0.01
101	4.48	194.429	1.4
101.05	6.429	279.015	1.35
101.08	6.212	269.597	1.35
101.15	6.78	294.248	1.3
101.2	5.258	228.194	0.99
101.34	5.563	241.431	1.25
101.35	5.187	225.113	1.48
101.36	4.931	214.003	0.22
101.4	5.2	225.677	1.33
101.51	3.79	164.484	1.06
101.55	7.287	316.252	0.57
101.66	3.427	148.73	-0.19
101.67	5.545	240.65	1.26
101.68	4.462	193.648	1.19
101.72	5.216	226.371	1.33
101.9	2.45	106.329	0.47
102.13	4.944	214.567	1.42
102.21	2.348	101.902	0.45
102.37	5.954	258.4	1
102.73	4.932	214.046	1.34
102.91	6.596	286.263	1.33
103.54	5.566	241.561	0.68
103.6	2.882	125.077	0.81
104.17	4.23	183.58	1.56
104.6	4.262	184.968	1.22
104.69	3.79	164.484	1.04
104.74	4.168	180.889	-0.11
104.75	5.088	220.816	1.41
104.79	1.48	64.2311	0.34
104.84	6.378	276.801	1.62
104.9	6.452	280.013	1.05
104.91	5.286	229.409	0.62
105.15	6.977	302.798	1.19
105.27	2.64	114.574	0
105.41	5.853	254.017	0.84
105.48	4.331	187.963	0.83
105.64	5.823	252.715	1.37
105.85	6.098	264.65	1.53
105.86	5.198	225.59	1.2
105.89	2.19	95.0447	0.51
106.04	4.813	208.881	1.76
106.18	4.917	213.395	1.44
106.2	6.431	279.102	1.32
106.65	5.764	250.154	1.4
106.67	3.648	158.321	0.9
106.98	5.825	252.802	1.58
107.26	0.964	41.837	-0.24
107.27	3.131	135.884	0.82
107.47	5.873	254.885	3.47
107.6	3.731	161.923	0
107.73	4.729	205.236	1.61
107.78	3.135	136.057	0.99
108.07	3.009	130.589	0.76
108.17	4.306	186.878	1.63
108.49	5.235	227.196	1.37
108.54	4.294	186.357	0.94
108.75	3.289	142.741	0.57
108.77	2.775	120.433	0.78
108.86	4.77	207.015	1.74
109.23	4.77	207.015	1.3
109.68	3.323	144.216	-0.19
109.86	3.774	163.789	0.96
110.14	5.293	229.713	1.19
110.16	2.53	109.801	0.82
110.46	2.914	126.466	0.6
110.75	3.779	164.006	1.04
110.9	5.442	236.18	1.38
111.05	3.008	130.545	0.81
111.45	4.398	190.871	1.55
111.55	4.223	183.276	0.48
112.35	2.657	115.312	0.78
113.48	5.088	220.816	1.22
113.66	4.579	198.726	1.27
114.41	5.357	232.491	1.5
114.46	4.324	187.659	1.19
114.83	1.32	57.2872	0.28
115.33	4.754	206.321	1.27
115.83	3.039	131.891	0.92
116.02	4.996	216.823	1.33
116.02	4.999	216.954	1.39
116.32	2.931	127.204	0.79
117.11	3.057	132.672	0.75
117.22	2.24	97.2147	0.5
117.32	2.793	121.215	0.73
117.81	2.01	87.2328	0.32
118.61	1.46	63.3631	0.33
119.01	1.6	69.4391	0.53
119.21	4.568	198.249	1.29
120.19	0.287	12.4556	-0.13
120.49	2.965	128.679	0.6
120.6	3.312	143.739	1.01
120.65	4.579	198.726	1.53
120.94	4.375	189.872	1.27
120.99	5.693	247.073	1.2
121.25	1.73	75.081	0.01
121.29	3.121	135.45	1.13
121.59	2.654	115.182	0.66
121.77	4.432	192.346	1.39
122.47	5.598	242.95	1.43
122.77	2.23	96.7807	-0.44
122.88	2.829	122.777	0.57
123.49	5.563	241.431	1.25
124.04	4.441	192.737	1.49
124.32	6.541	283.876	0.48
124.37	1.36	59.0232	0.28
124.85	4.43	192.259	1.5
125.22	4.891	212.267	0.87
125.27	4.937	214.263	1.37
125.68	5.667	245.944	1.19
125.71	6.463	280.49	0.9
125.76	4.788	207.796	1.03
125.82	3.303	143.348	-0.22
125.95	4.28	185.75	1.32
126	5.667	245.944	1.06
126.31	5.325	231.102	1.5
126.48	5.214	226.285	1.09
126.75	2.993	129.894	0.63
126.76	2.988	129.677	0.88
126.76	5.942	257.879	1.01
127.1	5.637	244.643	0.75
127.28	5.366	232.881	0.7
127.65	4.168	180.889	1.38
127.75	2.938	127.507	0.7
127.81	4.681	203.153	1.62
127.84	0.994	43.139	0.05
127.95	2.3	99.8187	0.5
128.03	0.281	12.1952	-0.28
128.35	2.534	109.974	0.71
128.44	2.967	128.766	1
128.45	1.44	62.4952	0.4
128.71	3.951	171.471	1.41
128.87	5.203	225.807	0.59
128.95	5.161	223.984	1.27
129.34	1.66	72.043	0.49
129.62	4.407	191.261	0.13
129.77	4.439	192.65	1.21
129.9	5.143	223.203	1.33
129.92	5.864	254.494	1.25
129.96	4.655	202.024	0.47
130.2	1.97	85.4969	-0.72
130.27	2.65	115.008	-0.1
130.45	5.336	231.579	1.19
130.46	4.322	187.572	0.28
130.57	3.858	167.435	0.49
130.89	5.318	230.798	0.59
131.05	5.341	231.796	1.1
131.23	2.21	95.9127	0.62
131.25	4.783	207.579	1.56
131.97	4.506	195.558	1.44
132.17	5.573	241.865	1.4
132.23	2.958	128.375	0.59
132.46	3.119	135.363	-0.3
132.78	5.465	237.178	1.3
133.76	4.819	209.142	1.34
133.86	4.586	199.03	1.09
134.2	4.388	190.437	1.48
134.51	3.252	141.135	1
134.54	2.497	108.368	-0.41
134.61	1.54	66.8351	0.35
134.71	4.018	174.379	1.37
135.36	3.852	167.175	0.85
135.87	0.943	40.9257	-0.12
136.4	1.82	78.9869	0.31
136.7	2.958	128.375	0.66
136.88	5.377	233.359	1.47
137.3	2.988	129.677	0.8
137.39	1.07	46.4374	0.23
137.59	1.82	78.9869	0.52
137.59	2.896	125.685	0.54
137.79	3.475	150.813	0.97
138.37	4.778	207.362	1.23
138.73	4.881	211.833	1.14
139.48	1.35	58.5892	-0.81
139.48	2.887	125.294	0.7
139.78	4.648	201.72	1.33
140.47	2	86.7988	0.64
140.58	3.031	131.544	0.87
141.42	1.77	76.817	-0.14
141.8	4.925	213.742	1.13
141.86	1.16	50.3433	0.2
141.86	1.77	76.817	0.21
142.76	3.142	136.361	0.77
142.76	4.405	191.174	1.26
142.96	2.889	125.381	0.54
143.4	4.547	197.337	1.39
143.79	4.216	182.972	1.21
144.45	1.68	72.911	0.45
145.4	5.338	231.666	1.25
145.94	2.652	115.095	0.5
145.94	2.981	129.374	1.08
146.14	2.635	114.357	0.65
146.54	2.94	127.594	0.6
146.64	3.02	131.066	0.82
146.93	1.13	49.0413	0.3
147.12	2.07	89.8368	0.28
147.13	2.25	97.6487	0.53
147.13	2.681	116.354	0.5
147.62	1.74	75.515	-0.59
148.72	2.1	91.1388	0.58
148.79	5.396	234.183	0.55
149.1	4.055	175.985	1.38
149.49	6.073	263.565	0.75
149.69	4.202	182.364	1.56
149.76	5.814	252.324	0.79
149.78	5.541	240.476	1.02
149.92	5.292	229.67	0.98
149.95	5.111	221.814	1.3
150.01	0.959	41.62	0.1
150.02	5.527	239.869	0.92
150.14	3.457	150.032	-0.17
150.17	5.722	248.331	0.9
150.29	5.559	241.257	0.83
150.3	4.668	202.588	1.07
150.31	1.37	59.4572	-0.77
150.36	5.403	234.487	0.4
150.38	5.92	256.925	1.1
150.42	6.047	262.436	0.86
150.49	1.12	48.6073	-0.68
150.59	6.143	266.603	0.75
150.64	5.755	249.764	0.77
150.65	4.191	181.887	0.82
150.68	0.287	12.4556	-0.2
150.68	4.753	206.277	0.95
150.71	4.898	212.57	0.94
150.71	5.543	240.563	1
150.81	6.224	270.118	0.87
150.86	5.718	248.158	0.8
150.9	5.295	229.8	0.93
151.04	5.607	243.341	0.54
151.06	6.472	280.881	0.78
151.07	5.286	229.409	0.73
151.08	2	86.7988	-0.47
151.12	1.89	82.0249	-0.57
151.2	1.01	43.8334	-0.74
151.25	5.485	238.046	1.03
151.39	1.53	66.4011	-0.63
151.87	5.063	219.731	0.45
152.07	4.913	213.221	1.12
152.3	0.416	18.0542	0.03
152.3	3.107	134.842	0.75
152.46	5.311	230.494	1.39
152.62	5.176	224.635	1
152.67	4.152	180.194	1.33
153.12	4.278	185.663	1.05
153.13	4.464	193.735	0.25
153.39	2.716	117.873	0.47
153.51	5.178	224.722	1.3
153.58	3.95	171.428	1.22
154.62	4.276	185.576	0.24
154.91	5.378	233.402	0.82
155.28	4.462	193.648	0.58
155.42	3.546	153.894	0.01
155.54	0.718	31.1608	-0.09
155.56	2.703	117.309	-0.1
155.62	5.04	218.733	0.56
155.77	4.99	216.563	0.42
156.1	4.432	192.346	0.34
156.17	3.681	159.753	-0.14
156.33	5.217	226.415	0.69
156.58	4.622	200.592	1.28
156.9	4.11	178.372	1.26
156.92	2.751	119.392	-0.3
157.16	5.153	223.637	0.91
157.18	5.031	218.342	0.9
157.27	2.965	128.679	0.43
157.46	2.41	104.593	0.37
157.46	3.772	163.703	1.28
157.67	1.2	52.0793	0.21
157.67	2.28	98.9507	0.59
157.77	3.048	132.281	0.8
157.87	1.89	82.0249	0.42
157.95	4.096	177.764	1.24
158.71	1.72	74.647	-0.59
159.51	2.15	93.3087	-0.2
159.82	1.07	46.4374	-0.06
160.08	5.12	222.205	1.32
160.1	2.919	126.683	0.43
160.67	4.14	179.674	0.39
160.84	1.26	54.6833	0.37
161.44	0.828	35.9347	0.18
161.54	2.437	105.764	0.65
162.36	5.212	226.198	0.95
162.39	3.77	163.616	1.27
162.86	5.125	222.422	1.24
162.92	3.836	166.48	1.34
163.23	0.996	43.2258	0.34
163.28	4.759	206.538	1.21
163.86	4.082	177.156	0.94
164.82	4.322	187.572	1.19
165.12	2.709	117.569	0.85
165.4	4.462	193.648	1.3
165.7	4.133	179.37	1.11
165.97	4.207	182.581	1.32
166.12	3.13	135.84	-0.16
166.41	1.29	55.9852	0.09
167.15	4.177	181.279	1.3
167.6	3.041	131.978	1.01
167.85	4.599	199.594	1.28
169.41	4.997	216.867	1.19
171.37	0.846	36.7159	0.06
171.98	1.43	62.0612	0.35
171.98	2.19	95.0447	0.64
173.17	1.97	85.4969	0.47
173.46	3.813	165.482	1.26
173.59	5.221	226.588	1.24
173.75	1.51	65.5331	-0.56
173.96	1.92	83.3269	0.5
174.22	4.175	181.193	0.39
174.28	5.107	221.641	0.56
174.9	5.327	231.189	0.91
175.1	5.343	231.883	0.64
175.26	3.071	133.28	0.72
175.44	5.23	226.979	1.35
175.58	5.343	231.883	0.81
175.64	1.29	55.9852	0.11
175.65	2.825	122.603	0.59
175.81	0.453	19.6599	-0.22
175.85	3.116	135.233	0.7
176.15	2.12	92.0068	0.56
176.54	4.645	201.59	1.26
176.55	2.454	106.502	0.43
176.55	4.717	204.715	0.33
176.59	4.758	206.494	2.19
177.24	0.888	38.5387	0.18
177.44	0.538	23.3489	0.11
177.53	4.669	202.632	1.03
177.64	0.472	20.4845	0.13
177.67	2.638	114.488	0.25
178.18	3.893	168.954	0.1
178.54	3.549	154.025	0.68
178.63	1.24	53.8153	-0.66
178.77	5.091	220.946	1.31
179.17	3.521	152.809	0.02
179.67	5.157	223.811	0.8
180.17	3.33	144.52	-0.11
180.38	5.104	221.511	0.54
180.45	2.23	96.7807	-0.1
180.53	5.003	217.127	0.6
180.55	2.784	120.824	0.09
180.84	4.813	208.881	0.39
181.16	1.43	62.0612	-0.15
181.21	4.87	211.355	0.43
181.33	4.381	190.133	1.32
181.5	0.899	39.0161	0.12
181.68	4.765	206.798	0.65
182.33	4.009	173.988	1.28
182.47	2.332	101.207	-0.4
183.24	5.038	218.646	0.81
184.47	5.159	223.898	1.36
184.55	1.33	57.7212	-0.69
184.68	3.183	138.14	0.92
185.09	3.179	137.967	0.76
186.88	2.65	115.008	0.51
186.96	3.496	151.724	0.11
187.37	4.835	209.836	1.13
187.86	0.722	31.3344	0.01
187.98	3.222	139.833	0.89
189.78	2.23	96.7807	0.09
191.03	5.086	220.729	0.93
191.52	4.072	176.722	1.42
191.64	0.444	19.2693	0.18
194.03	0.543	23.5659	0.13
194.33	2.19	95.0447	0.58
194.73	2.776	120.477	0.57
195.63	1.72	74.647	0.45
195.72	1.88	81.5909	0.46
195.92	2.701	117.222	0.63
196.02	2.05	88.9688	0.53
196.62	2.3	99.8187	0.65
196.82	1.32	57.2872	0.31
196.87	4.37	189.655	1.25
197.19	3.977	172.599	1.27
197.41	1.82	78.9869	0.41
197.71	1.81	78.5529	0.39
197.96	5.137	222.943	0.54
198.08	4.907	212.961	0.62
198.15	5.311	230.494	0.69
198.44	4.866	211.182	1.08
198.53	4.7	203.977	0.79
198.73	4.308	186.965	1.31
199.28	0.633	27.4718	-0.82
199.84	0.384	16.6654	-0.28
199.87	5.182	224.896	0.7
200.14	5.187	225.113	0.48
200.21	0.962	41.7502	-0.87
200.36	3.988	173.077	1.35
200.36	4.853	210.617	0.28
200.37	1.83	79.4209	-0.55
200.57	4.876	211.616	0.88
200.67	5.081	220.512	0.03
200.68	1.15	49.9093	0.18
200.73	5.336	231.579	0.35
200.81	5.143	223.203	0.69
200.91	0.632	27.4284	-0.77
200.99	1.16	50.3433	0.14
200.99	4.878	211.702	0.37
201	4.384	190.263	0.09
201.04	4.735	205.496	0.79
201.11	5.23	226.979	0.73
201.12	5.013	217.561	0.41
201.13	4.407	191.261	1.24
201.18	1.12	48.6073	-0.66
201.41	0.812	35.2403	-0.93
201.42	4.574	198.509	0.2
201.44	4.841	210.097	0.41
201.69	1.71	74.213	0.22
201.74	5.071	220.078	1.28
201.76	4.398	190.871	0.86
201.91	4.632	201.026	0.81
201.95	4.404	191.131	0.81
202.98	3.381	146.733	0.1
203.16	4.696	203.804	1.11
203.22	3.528	153.113	-0.01
203.32	3.716	161.272	0.06
203.75	2.802	121.605	-0.24
204.51	3.649	158.364	0
204.87	1.04	45.1354	-0.65
205.04	2.14	92.8748	-0.2
205.16	4.971	215.739	0.46
205.25	1.42	61.6272	0.21
205.31	3.094	134.278	-0.17
205.34	2.571	111.58	-0.05
205.38	4.902	212.744	0.56
205.65	0.055	2.38697	-0.08
205.68	4.882	211.876	0.21
205.69	2.548	110.582	-0.41
205.9	4.682	203.196	0.36
206.11	4.618	200.419	0.29
206.17	4.618	200.419	1.15
206.21	5.009	217.388	0.5
206.3	4.076	176.896	1.38
206.55	4.971	215.739	0.6
207.05	1.99	86.3648	0.42
207.35	2.857	123.992	0.68
207.65	4.269	185.272	1.33
207.71	2.05	88.9688	-0.5
207.75	0.886	38.4519	0.1
207.77	4.094	177.677	1.29
208.01	4.29	186.183	1.24
208.13	3.121	135.45	1.07
208.15	3.926	170.386	1.21
208.27	2.555	110.886	-0.2
208.34	0.584	25.3453	0.12
209.42	3.413	148.122	0.8
209.69	0.34	14.7558	-0.14
209.78	0.729	31.6382	-0.24
209.9	1.04	45.1354	-0.78
210.4	4.708	204.324	1.2
211.25	0.69	29.9456	-0.15
212.3	3.459	150.119	1.21
212.31	1.78	77.251	0.58
212.65	3.39	147.124	0.05
212.97	3.535	153.417	1
213.32	3.064	132.976	0.46
214.16	4.2	182.278	1.14
214.83	3.788	164.397	0.04
215.49	4.664	202.415	1.13
215.95	0.267	11.5876	-0.14
218.42	4.508	195.645	1.24
219.96	2.26	98.0827	0.63
220.19	0.538	23.3489	-0.25
220.33	4.184	181.583	0.68
221.63	5.147	223.377	0.68
225.13	0.773	33.5477	0.14
225.23	1.45	62.9292	0.37
225.7	2.694	116.918	0.77
225.71	1.85	80.2889	0.47
225.75	4.694	203.717	1.29
225.83	0.892	38.7123	-0.69
226.22	2.873	124.687	0.67
226.27	5.019	217.822	0.8
226.62	0.837	36.3253	0.14
227.12	1.77	76.817	0.35
227.27	4.855	210.704	0.75
227.52	1.44	62.4952	0.09
229.19	0.837	36.3253	0.06
229.79	1.51	65.5331	0.22
229.86	2.821	122.43	-0.26
229.95	2.942	127.681	-0.21
230.68	2.27	98.5167	0.11
231.28	4.535	196.816	0.24
232.88	2.65	115.008	0.67
232.88	3.933	170.69	1.18
234.97	2.15	93.3087	0.54
236.58	2.518	109.28	-0.22
237.18	3.495	151.681	0.08
237.92	3.666	159.102	1.13
238.9	3.793	164.614	1.24
239.42	3.961	171.905	1.15
240.46	4.69	203.543	1.13
241.11	4.714	204.585	0.53
241.19	3.066	133.063	1.06
242.36	5.065	219.818	0.61
243.37	2.931	127.204	0.82
243.95	4.487	194.733	0.77
245.01	4.232	183.666	1.21
245.41	0.461	20.0071	-0.76
247.02	3.908	169.605	1.29
247.21	5.132	222.726	0.68
248.18	1.11	48.1734	0.18
248.3	4.347	188.657	1.27
248.47	4.294	186.357	0.16
248.58	5.102	221.424	0.42
249.07	0.851	36.9329	0.15
249.3	4.763	206.711	1.28
249.35	1.89	82.0249	0.62
249.46	4.244	184.187	0.16
249.93	4.94	214.393	0.51
250.02	4.085	177.287	0.08
250.14	4.863	211.051	0.28
250.17	4.607	199.941	0.32
250.17	4.843	210.183	0.65
250.18	1.22	52.9473	-0.65
250.18	4.7	203.977	0.62
250.22	4.779	207.406	0.16
250.25	4.055	175.985	0.1
250.29	4.814	208.925	0.67
250.39	4.283	185.88	0.16
250.41	5.23	226.979	0.56
250.6	1.97	85.4969	-0.51
250.61	4.359	189.178	0.18
250.65	2.774	120.39	-0.3
250.67	4.398	190.871	0.22
250.72	2.942	127.681	-0.29
250.76	1.12	48.6073	0.49
250.83	4.802	208.404	-0.02
250.89	0.612	26.5604	-0.73
250.94	1.12	48.6073	0.18
250.95	1.13	49.0413	-0.28
250.99	3.825	166.003	0.04
251.01	0.626	27.168	-0.73
251.04	0.978	42.4446	0.19
251.07	4.409	191.348	0.18
251.23	3.261	141.525	-0.04
251.27	0.734	31.8552	-0.73
251.44	0.748	32.4628	-0.77
251.45	1	43.3994	0.15
251.45	4.802	208.404	0.82
251.89	0.4	17.3598	-0.2
251.95	0.985	42.7484	0.24
252.05	1.74	75.515	0.34
252.36	4.071	176.679	0.52
252.43	4.549	197.424	0.47
252.85	0.734	31.8552	0.18
253.04	1.9	82.4589	0.56
253.1	2.922	126.813	-0.18
253.38	3.803	165.048	0.19
253.61	4.464	193.735	1.13
253.8	2.839	123.211	-0.23
254.5	4.494	195.037	1.2
254.51	1.82	78.9869	-0.3
254.51	4.526	196.426	0.26
254.63	0.994	43.139	0.24
254.7	2.58	111.97	-0.28
254.96	0.741	32.159	-0.74
255.11	2.314	100.426	-0.1
255.2	2.614	113.446	-0.27
255.67	4.885	212.006	0.5
255.82	1.42	61.6272	0.16
256.05	4.68	203.109	0.3
256.34	4.29	186.183	0.17
256.51	3.972	172.382	1.2
256.56	3.866	167.782	0.35
256.72	4.457	193.431	0.09
257.7	1.42	61.6272	-0.6
257.81	1.26	54.6833	0.21
258.81	3.965	172.079	1.25
258.9	4.457	193.431	1.2
258.91	1.72	74.647	0.28
258.94	4.278	185.663	1.19
260.39	0.698	30.2928	-0.85
260.43	0.547	23.7395	-0.19
260.66	3.687	160.014	0.4
260.69	0.925	40.1445	0.21
261.44	0.474	20.5713	-0.04
261.7	0.619	26.8642	-0.17
261.73	0.23	9.98187	-0.23
262.78	0.946	41.0558	0.21
263.45	2.401	104.202	0.81
263.62	4.697	203.847	1.17
265.1	4.241	184.057	1.16
265.15	2.316	100.513	-0.2
265.5	1.86	80.7229	0.53
266.04	0.565	24.5207	0.18
266.93	4.457	193.431	1.25
267.74	1.05	45.5694	0.2
267.84	2.565	111.32	0.5
269.21	0.837	36.3253	0.07
273.31	4.908	213.004	0.54
274	0.676	29.338	-0.07
275.39	1.62	70.3071	0.41
275.57	1.25	54.2493	0.23
276.95	2.26	98.0827	0.76
277.96	0.86	37.3235	0.2
278.98	1.91	82.8929	-0.53
279.34	2.467	107.066	-0.3
279.61	2.616	113.533	-0.13
279.86	0.258	11.197	0.02
279.91	3.188	138.357	1.01
280.06	4.503	195.428	1.17
285.56	4.694	203.717	1.17
287.63	3.399	147.515	1.01
288.01	2.732	118.567	0.7
288.98	1.5	65.0991	0.48
289.27	4.508	195.645	1.1
289.3	1.97	85.4969	0.52
290.14	1.43	62.0612	0.41
292.67	0.773	33.5477	0.18
292.96	3.929	170.516	0.93
294.74	0.574	24.9113	-0.88
295.13	0.948	41.1426	-0.72
295.73	3.565	154.719	0.19
295.96	0.583	25.3019	-0.83
296.25	4.985	216.346	0.74
296.34	4.762	206.668	0.4
297.39	4.932	214.046	0.71
297.49	3.796	164.744	-0.06
297.81	0.681	29.555	0.09
298.09	5.139	223.03	-0.01
298.17	4.907	212.961	0.28
299.09	5.033	218.429	0.44
299.19	1.83	79.4209	-0.31
299.36	4.473	194.126	1.28
299.63	0.267	11.5876	-0.32
299.72	0.938	40.7087	0.14
299.87	3.094	134.278	-0.05
299.89	4.494	195.037	1.21
300.04	3.731	161.923	-0.02
300.27	0.559	24.2603	-0.72
300.31	1.57	68.1371	-0.57
300.42	3.036	131.761	-0.15
300.42	4.887	212.093	0.37
300.43	3.563	154.632	-0.01
300.46	3.264	141.656	-0.08
300.58	4.133	179.37	0.06
300.71	3.839	166.61	0.07
300.77	3.245	140.831	-0.24
300.8	0.501	21.7431	-0.71
300.82	4.797	208.187	0.73
300.92	2.11	91.5728	-0.46
300.92	3.632	157.627	0.04
300.94	3.698	160.491	0.06
300.96	2.09	90.7048	-0.4
301.05	0.623	27.0378	-0.72
301.05	4.425	192.042	0.33
301.06	3.509	152.289	0.02
301.09	4.878	211.702	0.32
301.26	1.21	52.5133	-0.1
301.29	1.29	55.9852	0.24
301.33	0.4	17.3598	-0.19
301.38	0.478	20.7449	-0.34
301.49	2.436	105.721	-0.18
301.51	1.36	59.0232	0.33
301.53	0.649	28.1662	-0.73
301.92	3.16	137.142	0.1
302.9	1.4	60.7592	0.2
302.97	2.316	100.513	-0.36
303.46	4.384	190.263	1.22
303.51	5.148	223.42	0.57
303.57	1.65	71.609	-0.3
303.98	1.89	82.0249	0.52
304.29	0.729	31.6382	-0.04
304.31	4.559	197.858	0.49
304.36	2.392	103.811	-0.36
304.84	3.808	165.265	0.05
304.87	2.07	89.8368	-0.43
305.15	0.638	27.6888	-0.75
305.49	1.2	52.0793	-0.63
305.57	2.1	91.1388	-0.39
305.92	4.361	189.265	0.3
305.96	0.565	24.5207	0.09
305.97	1.36	59.0232	0.23
305.98	1.97	85.4969	0.44
305.98	4.386	190.35	0.29
306.07	3.741	162.357	0.05
306.27	4.386	190.35	0.3
306.65	4.673	202.805	0.48
307.13	3.977	172.599	1.04
307.17	0.761	33.027	-0.03
307.58	1.06	46.0034	-0.8
307.96	0.706	30.64	0.12
308.56	1.54	66.8351	0.19
308.64	4.375	189.872	1.29
308.84	0.911	39.5369	0.03
308.96	0.506	21.9601	0.01
309.64	3.696	160.404	1.15
309.66	4.274	185.489	1.13
309.75	1.32	57.2872	0.27
310.17	0.64	27.7756	-0.77
310.19	3.503	152.028	0.23
310.41	4.444	192.867	0.42
311.14	1.22	52.9473	0.31
311.33	0.469	20.3543	-0.15
311.58	0.529	22.9583	-0.01
311.66	0.393	17.056	-0.27
313.15	3.144	136.448	1
314.14	4.517	196.035	0.44
314.88	2.424	105.2	-0.08
315.25	0.767	33.2874	0.2
315.97	4.156	180.368	0.31
318.33	4.432	192.346	0.38
318.35	1.36	59.0232	0.47
320.52	2.22	96.3467	0.69
321.57	0.874	37.9311	0.03
322.64	1.82	78.9869	0.59
323.85	4.278	185.663	1.12
323.86	4.453	193.258	1.2
325.71	1.55	67.2691	0.26
327.62	4.591	199.247	1.19
328.83	2.769	120.173	0.79
328.99	1.55	67.2691	0.44
330.21	0.397	17.2296	0.05
333.98	0.317	13.7576	0.05
334.62	1.22	52.9473	0.29
334.68	4.501	195.341	1.3
335.21	4.097	177.807	1.01
335.31	1.78	77.251	-0.29
337.79	4.471	194.039	1.18
339.87	4.423	191.956	1.26
342.02	1.47	63.7971	0.25
342.99	3.098	134.451	0.81
345.82	4.156	180.368	0.36
346.29	4.671	202.719	0.63
346.45	4.884	211.963	0.41
346.54	0.454	19.7033	-0.68
346.71	3.14	136.274	-0.14
346.77	4.551	197.511	0.44
347.15	1.19	51.6453	0.19
347.26	4.292	186.27	0.15
347.33	4.395	190.74	0.28
347.4	2.476	107.457	-0.22
347.57	4.423	191.956	1.2
347.61	4.902	212.744	0.49
347.72	4.983	216.259	-0.16
348.15	4.537	196.903	0.36
348.28	0.683	29.6418	0.09
350.1	4.365	189.438	0.23
350.14	3.698	160.491	-0.06
350.16	2.896	125.685	-0.16
350.17	4.202	182.364	0.18
350.26	0.789	34.2421	-0.69
350.39	2.617	113.576	-0.22
350.46	0.644	27.9492	0.23
350.47	3.179	137.967	-0.09
350.5	1.37	59.4572	-0.58
350.58	0.488	21.1789	-0.71
350.65	3.087	133.974	-0.15
350.71	3.208	139.225	-0.05
350.73	1.55	67.2691	-0.4
350.8	4.08	177.07	0.33
350.82	0.619	26.8642	-0.68
350.82	1.69	73.345	-0.52
350.83	2.429	105.417	-0.32
350.89	2.11	91.5728	-0.34
350.93	3.208	139.225	-0.1
350.96	1.69	73.345	-0.48
351.15	0.239	10.3725	-0.12
351.21	0.575	24.9547	-0.68
351.68	0.95	41.2294	-0.14
352	0.327	14.1916	-0.38
352.67	0.12	5.20793	-0.27
352.73	1.77	76.817	-0.19
353.04	0.488	21.1789	-0.11
353.11	1.35	58.5892	-0.4
354.12	1.8	78.119	-0.46
354.37	2.597	112.708	-0.13
354.52	1.21	52.5133	0.28
354.67	3.142	136.361	-0.11
355.12	0.542	23.5225	-0.75
355.12	1.37	59.4572	-0.51
355.2	1.56	67.7031	-0.26
355.61	1.12	48.6073	0.09
355.76	3.696	160.404	1.06
355.83	1.54	66.8351	-0.56
355.9	1.1	47.7394	0.22
355.91	3.172	137.663	-0.02
356.01	1.94	84.1949	-0.3
356.32	3.319	144.043	-0.03
356.36	1.07	46.4374	-0.25
356.38	2.945	127.811	-0.17
356.67	2.807	121.822	-0.17
357.08	4.498	195.211	1.28
357.65	0.819	35.5441	-0.7
358.6	0.743	32.2458	0.02
358.6	1.68	72.911	0.37
358.97	3.165	137.359	0.92
359.45	1.53	66.4011	0.38
359.6	0.632	27.4284	-0.06
359.87	1.21	52.5133	0.14
359.94	0.741	32.159	-0.75
360.38	0.253	10.9801	0.14
361.09	2.87	124.556	0.02
361.12	1.93	83.7609	0.49
361.29	2.813	122.083	0.88
361.38	2.04	88.5348	0.46
363.17	0.925	40.1445	0.14
364.68	4.372	189.742	1.03
366.12	0.42	18.2278	0.1
366.54	1.67	72.477	0.4
367.56	0.936	40.6219	0.17
368.23	2.2	95.4787	0.61
369.2	1.76	76.383	0.5
370.78	4.239	183.97	0.97
370.88	1.31	56.8532	0.14
371.09	4.529	196.556	1.13
371.14	4.301	186.661	1.19
373.02	3.742	162.401	1.09
373.75	4.441	192.737	1.01
375.27	3.496	151.724	0.17
379.25	0.21	9.11388	-0.24
380.62	3.185	138.227	0
380.74	0.466	20.2241	0.13
382.23	0.521	22.6111	0.1
382.33	0.538	23.3489	0.06
386.32	3.518	152.679	0.83
386.33	1.85	80.2889	0.5
387.69	0.4	17.3598	0.08
389.38	0.446	19.3561	0.02
390.7	3.043	132.064	-0.03
390.84	1.42	61.6272	-0.25
392.39	4.524	196.339	0.3
393.97	2.505	108.716	-0.35
394.39	2.19	95.0447	0.51
395.11	0.471	20.4411	-0.8
395.8	4.703	204.107	0.44
395.9	2.571	111.58	-0.22
395.92	1.47	63.7971	0.29
396.08	4.193	181.974	0.43
397.1	4.492	194.95	1.21
397.24	0.38	16.4918	-0.47
397.68	2.571	111.58	-0.2
397.82	3.369	146.213	0.01
397.84	0.505	21.9167	-0.78
398.27	0.264	11.4574	-0.05
399.07	0.17	7.3779	-0.27
399.07	1.99	86.3648	-0.4
399.11	0.732	31.7684	0.16
400.19	0.54	23.4357	-0.68
400.24	4.427	192.129	1.16
400.28	2.325	100.904	-0.28
400.32	2.14	92.8748	-0.32
400.34	0.623	27.0378	-0.73
400.45	2.381	103.334	-0.3
400.46	3.855	167.305	0.12
400.5	0.462	20.0505	-0.68
400.54	3.014	130.806	0.14
400.57	3.133	135.97	-0.28
400.58	1.05	45.5694	-0.63
400.74	0.442	19.1825	-0.69
400.8	1.88	81.5909	-0.36
400.8	2.857	123.992	-0.13
400.93	3.632	157.627	0.07
400.96	2.712	117.699	-0.16
401.05	1.43	62.0612	-0.48
401.1	1.41	61.1932	-0.51
401.18	0.524	22.7413	-0.72
401.22	1.91	82.8929	-0.45
401.25	2.627	114.01	-0.2
401.4	2.341	101.598	-0.46
401.65	3.02	131.066	-0.01
402.18	0.49	21.2657	-0.28
402.49	3.284	142.524	0.04
402.61	0.498	21.6129	-0.7
402.64	3.282	142.437	0.11
402.78	1.85	80.2889	-0.24
403.1	0.276	11.9782	-0.38
403.27	1.38	59.8912	-0.28
403.47	1.23	53.3813	-0.61
403.72	0.95	41.2294	-0.26
404.04	0.985	42.7484	-0.69
404.07	1.45	62.9292	-0.37
404.7	1.81	78.5529	0.5
405.17	1.09	47.3054	-0.58
405.28	1.21	52.5133	-0.6
405.34	0.881	38.2349	0.04
405.58	2.03	88.1008	-0.34
405.63	0.808	35.0667	-0.7
405.64	0.508	22.0469	0.04
405.82	4.544	197.207	1.2
405.87	3.501	151.941	0.86
406.45	2.504	108.672	-0.19
406.82	0.787	34.1553	0.11
406.83	2.536	110.061	-0.3
407.14	0.545	23.6527	0.09
408.13	2.02	87.6668	0.58
408.29	0.681	29.555	-0.7
408.41	0.526	22.8281	-0.73
408.49	1.43	62.0612	0.2
408.83	1.32	57.2872	0.23
408.9	1.21	52.5133	0.17
408.9	1.9	82.4589	0.45
409.33	1.03	44.7014	0.2
409.58	2.742	119.001	0.77
410.12	0.488	21.1789	-0.07
410.32	3.563	154.632	0.21
410.34	4.735	205.496	1.24
410.46	2.26	98.0827	-0.3
410.86	1.81	78.5529	0.28
411	2.2	95.4787	-0.12
412.1	0.662	28.7304	-0.2
412.2	0.722	31.3344	0.13
412.46	0.426	18.4882	-0.13
412.6	0.488	21.1789	-0.11
412.92	0.517	22.4375	-0.05
415.94	1.24	53.8153	0.11
416.58	4.451	193.171	1.18
418.26	1.22	52.9473	0.14
422.12	2.88	124.99	0.84
422.13	1.13	49.0413	0.26
422.72	0.398	17.273	0.01
423.23	4.354	188.961	1.18
423.66	3.956	171.688	1.11
424.18	1.13	49.0413	-0.42
426.91	1.46	63.3631	0.26
427.6	4.446	192.954	1.08
427.86	0.737	31.9854	0.13
429.38	0.653	28.3398	0.08
429.9	4.722	204.932	1.29
431.35	4.184	181.583	1.1
431.76	0.561	24.3471	-0.02
436.12	3.257	141.352	0.77
436.64	2.1	91.1388	0.53
438.21	0.322	13.9746	-0.33
438.99	0.915	39.7105	-0.68
443.55	4.418	191.739	0.32
445	3.234	140.354	-0.09
445.15	3.555	154.285	-0.07
445.29	1.83	79.4209	0.31
446.29	2.701	117.222	-0.07
446.92	4.2	182.278	-0.15
447.41	3.209	139.269	-0.04
449.11	0.561	24.3471	0.09
449.22	1.41	61.1932	0.28
449.41	3.608	156.585	0.09
451.89	0.966	41.9238	-0.5
454.16	0.948	41.1426	-0.39
454.67	1.94	84.1949	-0.34
454.8	2.05	88.9688	-0.3
454.92	0.98	42.5314	-0.64
455.1	0.87	37.7575	-0.66
456.3	1.92	83.3269	-0.4
457.49	2.592	112.491	-0.16
457.84	0.531	23.0451	0.08
457.94	0.485	21.0487	-0.7
458.43	2.18	94.6107	0.56
458.62	2.01	87.2328	0.47
459.05	0.888	38.5387	0.09
459.31	0.904	39.2331	0.11
459.94	0.658	28.5568	-0.06
460.34	0.823	35.7177	0.04
460.84	4.785	207.666	1.24
461.07	1.81	78.5529	0.38
462.02	0.451	19.5731	0.04
462.08	1.46	63.3631	0.22
466.39	1.96	85.0629	-0.32
466.88	1.89	82.0249	-0.22
469.57	0.883	38.3217	-0.01
471.42	4.749	206.104	1.39
471.48	2.544	110.408	0.72
472.32	4.08	177.07	1.07
472.64	1.61	69.8731	0.37
478.58	0.329	14.2784	-0.36
479.45	4.622	200.592	1.21
481.32	1.83	79.4209	-0.34
482.07	1.25	54.2493	0.36
482.49	1.93	83.7609	0.41
484.56	4.932	214.046	1.29
485.39	1.55	67.2691	0.22
485.77	5.107	221.641	1.27
487.52	0.72	31.2476	-0.64
487.84	2.12	92.0068	0.41
490.13	3.92	170.126	-0.16
490.71	0.491	21.3091	-0.83
492.33	4.127	179.109	1.05
492.47	3.89	168.824	0.96
492.98	1.64	71.175	-0.43
494.01	2.35	101.989	-0.18
494.02	0.441	19.1391	-0.77
494.58	0.365	15.8408	-0.72
494.58	1.98	85.9308	0.34
494.65	1.42	61.6272	-0.19
494.81	3.883	168.52	0.28
495.1	3.847	166.958	0.14
496.04	1.38	59.8912	-0.75
496.32	2.665	115.659	-0.27
498.38	1.46	63.3631	-0.86
499.3	0.17	7.3779	-0.36
500.06	0.23	9.98187	-0.36
500.22	1.63	70.741	-0.42
500.36	2.5	108.499	-0.13
500.37	0.285	12.3688	-0.29
500.38	1.35	58.5892	-0.47
500.42	1.21	52.5133	-0.5
500.43	1.75	75.949	-0.35
500.51	0.704	30.5532	-0.65
500.63	1.5	65.0991	-0.36
500.69	0.449	19.4863	-0.7
500.71	0.66	28.6436	0.07
500.78	1.24	53.8153	-0.47
500.79	1.38	59.8912	-0.5
500.84	0.547	23.7395	-0.67
500.84	1.55	67.2691	-0.46
500.85	0.442	19.1825	-0.68
501.03	0.936	40.6219	-0.57
501.12	2.02	87.6668	-0.52
501.31	2.362	102.509	-0.23
501.32	0.386	16.7522	-0.73
501.46	0.405	17.5768	-0.66
501.67	0.511	22.1771	-0.5
502.08	2.05	88.9688	-0.26
502.15	0.794	34.4591	-0.53
502.26	4.632	201.026	1.26
502.31	1.01	43.8334	-0.01
502.41	0.938	40.7087	0.06
502.89	0.411	17.8372	-0.74
502.99	0.242	10.5027	-0.47
503.51	4.84	210.053	1
503.6	1.9	82.4589	-0.21
503.69	0.888	38.5387	0.15
503.86	1.55	67.2691	-0.4
504.06	3.204	139.052	0.63
504.25	0.819	35.5441	-0.68
504.53	0.737	31.9854	-0.73
504.61	0.872	37.8443	-0.62
506.14	1.41	61.1932	-0.45
506.33	0.932	40.4483	-0.64
506.33	1.44	62.4952	-0.46
506.43	2.09	90.7048	0.41
506.44	0.278	12.065	-0.15
506.62	0.647	28.0794	-0.68
507.84	1.32	57.2872	0.26
508.06	1.18	51.2113	0.2
508.07	0.455	19.7467	-0.7
508.31	1.67	72.477	0.3
508.85	1.71	74.213	0.2
509.01	0.644	27.9492	0
509.17	0.392	17.0126	-0.84
509.22	2.675	116.093	0.63
510.05	1.03	44.7014	0.11
510.44	0.876	38.0179	0.12
510.56	2.988	129.677	0.54
510.74	1.34	58.1552	0.22
511.24	0.911	39.5369	0.04
512.15	0.435	18.8787	-0.19
512.56	1.84	79.8549	0.42
512.72	0.614	26.6472	0.05
514.28	0.817	35.4573	-0.14
514.31	0.665	28.8606	-0.11
515.6	1.24	53.8153	0.12
517.72	5.122	222.292	1.32
519.43	3.445	149.511	0.87
520.72	2.28	98.9507	0.62
521.43	4.246	184.274	1.07
521.77	0.874	37.9311	-0.34
522.59	5.313	230.581	1.23
523.78	4.697	203.847	1.24
543.94	2.353	102.119	-0.01
544.1	0.585	25.3887	-0.52
545.58	3.121	135.45	-0.37
546.03	3.154	136.882	-0.17
547.34	2.11	91.5728	-0.24
548.7	1.45	62.9292	0.34
549.25	5.194	225.417	1.32
551.11	1.55	67.2691	0.35
552.19	0.978	42.4446	-0.49
552.45	4.12	178.806	0.84
552.74	3.539	153.591	0.78
553.97	0.67	29.0776	-0.74
554.64	0.59	25.6057	-0.65
555.36	0.959	41.62	0.1
555.77	1.11	48.1734	-0.56
559.78	1.58	68.5711	0.25
561.46	5.403	234.487	1.26
563.8	4.349	188.744	1.02
564.96	5.015	217.648	0.98
566.51	1.07	46.4374	-0.47
568.13	5.088	220.816	1.26
570.99	0.421	18.2712	-0.33
572.24	1.38	59.8912	0.3
572.36	4.131	179.283	1.05
580.76	0.704	30.5532	0.04
584.58	1.71	74.213	0.19
588.7	2.23	96.7807	0.33
589.56	5.518	239.478	1.25
592.88	0.998	43.3126	-0.55
593.41	0.34	14.7558	-0.9
593.57	0.987	42.8352	-0.74
593.83	1.26	54.6833	-0.55
593.96	0.431	18.7051	-0.79
594.59	2.717	117.916	-0.34
594.7	0.436	18.9221	-0.83
594.83	0.697	30.2494	-0.55
594.96	0.858	37.2367	-0.45
595.99	1.73	75.081	0.27
596.14	2.385	103.508	0.01
596.53	1.31	56.8532	0.38
597.36	3.452	149.815	0.76
597.4	0.437	18.9655	-0.54
598.3	2.371	102.9	0.41
598.46	0.324	14.0614	-0.38
599.19	0.559	24.2603	-0.03
599.43	0.368	15.971	-0.61
600.22	0.911	39.5369	-0.59
600.3	1.43	62.0612	0.18
600.32	0.752	32.6364	-0.58
600.33	1.03	44.7014	-0.49
600.34	0.922	40.0143	-0.54
600.4	1.23	53.3813	-0.4
600.45	1.22	52.9473	-0.44
600.48	0.782	33.9383	-0.54
600.54	0.19	8.24589	-0.35
600.56	0.691	29.989	-0.69
600.57	0.478	20.7449	-0.57
600.58	0.612	26.5604	-0.62
600.61	0.909	39.4501	-0.51
600.65	0.784	34.0251	-0.48
600.68	0.375	16.2748	-0.65
600.71	0.614	26.6472	-0.59
600.84	0.449	19.4863	-0.66
600.86	0.377	16.3616	-0.67
600.88	0.706	30.64	-0.56
600.89	0.704	30.5532	-0.57
600.9	0.37	16.0578	-0.65
600.91	0.531	23.0451	-0.63
601.19	0.828	35.9347	-0.55
601.21	0.729	31.6382	-0.58
601.29	0.22	9.54787	-0.41
601.46	0.883	38.3217	-0.89
601.52	0.26	11.2838	-0.41
601.63	0.19	8.24589	-0.15
601.69	1.47	63.7971	0.15
601.94	0.274	11.8914	-0.5
602.23	0.994	43.139	-0.44
602.28	0.327	14.1916	-0.38
602.48	1.32	57.2872	0.2
602.54	5.047	219.037	1.17
602.57	1.12	48.6073	0.16
603.3	0.851	36.9329	-0.58
603.62	0.604	26.2132	-0.71
603.87	0.562	24.3905	-0.71
603.94	0.512	22.2205	-0.66
604.03	0.592	25.6925	-0.74
605.15	0.925	40.1445	-0.57
605.18	0.551	23.9131	-0.66
605.22	0.333	14.452	-0.1
606.09	0.604	26.2132	-0.54
607.49	0.391	16.9692	-0.7
608.98	0.784	34.0251	0.02
609.58	1.68	72.911	0.35
609.93	5.593	242.733	1.29
609.96	3.022	131.153	0.6
609.99	0.386	16.7522	-0.77
610.78	1.57	68.1371	0.23
612.68	0.361	15.6672	-0.23
612.77	0.688	29.8588	-1.48
612.78	3.353	145.518	0.72
613.4	3.429	148.817	0.73
613.41	1.91	82.8929	0.4
614.47	1.21	52.5133	0.22
614.72	0.745	32.3326	-0.2
614.81	3.381	146.733	0.77
615.85	0.699	30.3362	-0.17
617.78	5.446	236.353	1.35
619.09	2.23	96.7807	0.54
619.45	4.453	193.258	1.1
620.7	5.154	223.681	1.3
623.05	4.478	194.343	1.04
623.8	4.45	193.127	0.98
625.66	1.44	62.4952	0.21
630.07	5.267	228.585	1.29
631.39	0.778	33.7647	-0.68
635.5	0.545	23.6527	-0.51
638.11	5.371	233.098	1.3
638.97	5.137	222.943	0.96
640.36	1.79	77.685	0.36
641	1.46	63.3631	-0.61
641.99	1.5	65.0991	-0.39
642.46	1.12	48.6073	-0.83
642.71	1.36	59.0232	-0.29
645.24	1.95	84.6289	-0.49
645.83	1.79	77.685	-0.25
646.03	0.353	15.32	-0.6
649.08	0.775	33.6345	-0.5
651.92	0.423	18.358	-0.27
651.93	1.24	53.8153	0.13
653.34	0.441	19.1391	-0.68
653.36	0.5	21.6997	-0.71
655.19	0.308	13.367	-0.52
662.09	1.71	74.213	0.15
663.38	5.426	235.485	1.28
663.82	0.459	19.9203	-0.57
663.87	4.478	194.343	1.01
666.42	5.499	238.653	1.18
669.88	3.961	171.905	0.93
670.2	1.64	71.175	0.27
670.4	0.476	20.6581	-0.25
680.17	0.636	27.602	-0.17
684.63	4.117	178.675	1.06
688.42	2.04	88.5348	0.24
689.85	0.438	19.0089	-0.65
690.36	0.732	31.7684	-0.54
691.71	1.58	68.5711	0.17
692.12	0.354	15.3634	-0.62
692.75	1.79	77.685	-4.79
692.78	3.397	147.428	0.71
693.38	0.324	14.0614	-1
693.38	0.581	25.2151	-0.48
693.86	0.452	19.6165	-0.73
694.36	1.32	57.2872	-0.37
694.63	1.81	78.5529	0.29
695.46	1.29	55.9852	-0.68
698.98	0.366	15.8842	-0.64
699.14	0.451	19.5731	-1.01
700.03	0.322	13.9746	-0.56
700.22	0.53	23.0017	-0.66
700.3	0.285	12.3688	-0.66
700.3	0.621	26.951	-0.51
700.33	0.501	21.7431	-0.61
700.39	0.426	18.4882	-0.63
700.41	0.573	24.8679	-0.61
700.42	0.409	17.7504	-0.62
700.48	0.343	14.886	-0.63
700.64	0.52	22.5677	-0.56
700.82	0.366	15.8842	-0.54
700.82	1.66	72.043	0.19
700.84	0.437	18.9655	-0.73
700.89	0.306	13.2802	-0.29
700.93	0.517	22.4375	-0.6
701.05	0.354	15.3634	-0.65
701.14	0.58	25.1717	-0.59
701.16	0.439	19.0523	-0.61
701.37	0.426	18.4882	-0.63
701.45	0.586	25.4321	-0.58
701.64	0.35	15.1898	-0.66
702.15	0.464	20.1373	-0.72
702.31	0.356	15.4502	-0.39
702.49	0.468	20.3109	-0.79
702.51	0.367	15.9276	-0.74
702.7	4.317	187.355	1.02
703.17	0.297	12.8896	-0.4
703.42	0.313	13.584	-0.35
703.49	0.43	18.6617	-0.6
703.73	0.34	14.7558	-0.17
703.88	0.537	23.3055	-0.61
703.9	0.257	11.1537	-0.62
704.57	0.426	18.4882	-0.87
704.65	0.453	19.6599	-0.14
704.83	2.318	100.6	0.4
705	0.324	14.0614	-0.6
705.08	1.95	84.6289	0.21
705.51	0.666	28.904	-0.6
705.68	1.68	72.911	0.42
705.87	0.526	22.8281	-0.63
706.41	0.429	18.6183	-0.71
706.58	0.356	15.4502	-0.7
706.7	0.381	16.5352	-0.71
707.71	0.384	16.6654	-0.23
707.93	5.194	225.417	1.09
709.09	1.76	76.383	0.08
710.09	5.18	224.809	1.25
711.28	1.48	64.2311	0.13
712.23	1.61	69.8731	0.19
712.23	3.169	137.533	0.62
712.5	5.538	240.346	1.12
712.87	3.402	147.645	0.64
713.21	1.73	75.081	0.15
713.55	5.35	232.187	1.3
713.66	0.474	20.5713	-0.3
714.11	1.52	65.9671	-0.04
714.6	1.61	69.8731	0.22
714.81	2.05	88.9688	0.33
714.96	2.913	126.423	0.53
716.13	2.29	99.3847	0.47
716.8	5.387	233.793	1.35
717.54	0.612	26.5604	-0.2
717.71	5.462	237.048	1.27
720.26	3.158	137.055	0.67
720.26	5.078	220.382	1.26
724.98	0.869	37.7141	-0.01
725.84	4.843	210.183	1
741.12	0.868	37.6707	-0.74
741.72	0.824	35.7611	-0.85
742.37	0.975	42.3144	-0.53
744.04	1.15	49.9093	-0.52
744.67	0.441	19.1391	-0.95
746.93	0.2	8.67988	-0.57
751.58	0.271	11.7612	-0.58
753.99	0.373	16.188	-0.28
754.26	0.388	16.839	-0.67
754.89	0.22	9.54787	-0.49
755.93	0.301	13.0632	-0.6
757.38	1.55	67.2691	0.25
762.41	4.051	175.811	0.79
762.78	1.79	77.685	0.14
765.14	5.208	226.024	1.28
767.79	5.325	231.102	1.18
768.51	1.82	78.9869	0.28
768.93	5.23	226.979	1.26
769.14	3.689	160.1	0.79
771.14	0.646	28.036	-0.31
771.17	5.265	228.498	1.28
772.07	1.7	73.779	0.22
779.97	0.897	38.9293	-0.19
781.25	0.21	9.11388	-0.59
786.9	0.574	24.9113	-0.7
787.38	3.379	146.647	0.61
789.56	0.269	11.6744	-0.6
789.66	0.689	29.9022	-0.68
790.52	0.739	32.0722	-0.68
791.7	0.778	33.7647	-1.18
791.75	2.19	95.0447	0.31
792.83	0.709	30.7702	-0.47
793.54	0.48	20.8317	-0.81
793.66	0.822	35.6743	-0.24
794.57	1.72	74.647	0.16
795.85	0.495	21.4827	-0.44
796.49	1.95	84.6289	0.3
797.9	0.373	16.188	-0.59
798.97	0.258	11.197	-0.4
799.16	0.428	18.575	-0.3
799.94	0.412	17.8806	-0.49
800.18	0.23	9.98187	-0.64
800.28	0.39	16.9258	-0.7
800.39	0.483	20.9619	-0.62
800.43	0.356	15.4502	-0.72
800.47	0.269	11.6744	-0.59
800.47	0.399	17.3164	-0.75
800.48	0.421	18.2712	-0.58
800.48	0.483	20.9619	-0.63
800.54	0.301	13.0632	-0.55
800.54	0.331	14.3652	-0.53
800.63	0.2	8.67988	-0.68
800.63	0.26	11.2838	-0.58
800.65	0.235	10.1989	-0.62
800.71	0.35	15.1898	-0.62
800.83	0.412	17.8806	-0.68
800.89	0.455	19.7467	-0.72
800.92	0.237	10.2857	-0.64
800.93	0.23	9.98187	-0.87
800.93	0.469	20.3543	-0.64
801.28	0.356	15.4502	-0.67
801.67	0.292	12.6726	-0.58
801.8	1.75	75.949	0.15
801.81	0.39	16.9258	-0.7
801.87	0.402	17.4466	-0.73
802.01	3.296	143.044	0.64
802.2	0.418	18.141	-0.67
802.89	0.437	18.9655	-0.45
803.12	0.271	11.7612	-1.11
803.61	0.319	13.8444	-0.67
804.75	0.464	20.1373	-0.7
804.86	0.259	11.2404	-0.65
804.97	0.393	17.056	-0.39
804.99	0.281	12.1952	-0.62
805.38	0.6	26.0397	-0.13
805.43	0.519	22.5243	-0.63
805.81	0.35	15.1898	-0.7
805.91	0.491	21.3091	-0.62
806.36	2.373	102.987	0.26
806.65	1.91	82.8929	0.22
807.34	0.472	20.4845	-0.24
807.41	1.84	79.8549	0.21
808.22	3.08	133.67	0.54
810.57	4.813	208.881	1.24
811.38	4.776	207.276	0.98
811.57	0.624	27.0812	-0.54
812.22	0.495	21.4827	-0.41
813.91	1.7	73.779	0.07
814.78	5.124	222.379	1.17
815.14	0.846	36.7159	-0.25
815.18	5.127	222.509	1.29
815.56	2.15	93.3087	0.29
815.71	5.169	224.332	1.01
816.15	1.45	62.9292	0.08
816.44	3.193	138.574	0.54
817.07	2.816	122.213	0.31
818.11	4.404	191.131	0.97
818.76	5.116	222.031	1.12
818.78	0.589	25.5623	-0.2
819.22	0.922	40.0143	-0.37
820.36	4.664	202.415	1.1
839.05	0.633	27.4718	-0.57
839.32	0.519	22.5243	-0.92
840.92	0.631	27.385	-0.58
841.02	0.62	26.9076	-0.54
841.96	0.516	22.3941	-1.01
847.39	0.22	9.54787	-0.52
849.96	0.469	20.3543	-0.32
853.26	0.23	9.98187	-0.6
853.54	0.23	9.98187	-0.61
853.85	0.337	14.6256	-0.77
855.34	0.269	11.6744	-0.47
857.29	1.72	74.647	0.04
862.5	3.618	157.019	0.47
862.78	3.459	150.119	0.62
863.1	4.978	216.042	1.02
864.22	4.993	216.693	1.2
865.19	2.08	90.2708	0.06
865.66	4.813	208.881	1.02
868.16	2.2	95.4787	0.33
868.55	1.87	81.1569	0.26
881.51	0.22	9.54787	-0.57
882.82	3.358	145.735	0.51
885.77	0.539	23.3923	-0.62
889.07	0.503	21.8299	-0.67
890.89	0.409	17.7504	-0.86
890.91	0.388	16.839	-0.62
891.06	0.824	35.7611	-0.29
891.98	0.436	18.9221	-0.6
892.27	2.394	103.898	0.36
892.76	0.858	37.2367	-0.19
896.86	0.26	11.2838	-0.59
898.69	2.2	95.4787	0.35
898.99	2.11	91.5728	0.26
900.13	0.2	8.67988	-0.54
900.15	0.304	13.1934	-0.56
900.17	0.406	17.6202	-0.69
900.18	0.18	7.8119	-0.6
900.2	0.251	10.8933	-0.67
900.21	0.391	16.9692	-0.34
900.21	0.485	21.0487	-0.62
900.37	0.366	15.8842	-0.65
900.51	0.451	19.5731	-0.64
900.63	1.66	72.043	0.07
900.68	0.331	14.3652	-0.59
900.7	0.476	20.6581	-0.63
900.75	0.484	21.0053	-0.68
900.82	0.17	7.3779	-0.62
900.87	0.396	17.1862	-0.62
900.91	0.258	11.197	-0.54
901.04	0.308	13.367	-0.64
901.05	0.37	16.0578	-0.7
901.18	0.38	16.4918	-0.66
901.26	0.315	13.6708	-0.56
901.28	0.488	21.1789	-0.41
901.68	0.382	16.5786	-0.61
901.86	0.365	15.8408	-0.75
902.05	0.379	16.4484	-0.69
903.6	0.23	9.98187	-0.68
904.8	0.361	15.6672	-0.7
905.16	2.988	129.677	0.29
905.31	0.616	26.734	-0.39
905.38	0.328	14.235	-0.71
905.39	3.971	172.339	0.59
906.48	0.593	25.7359	-0.35
906.84	0.2	8.67988	-0.73
907	0.415	18.0108	-0.68
907.22	1.13	49.0413	-0.1
907.43	2.14	92.8748	0.17
910.33	4.088	177.417	0.83
910.9	2.24	97.2147	0.06
911.37	2.05	88.9688	0.14
913.13	0.544	23.6093	-0.84
913.41	4.616	200.332	1.02
913.94	0.487	21.1355	-0.64
915.3	1.76	76.383	0
915.33	0.395	17.1428	-0.58
916.36	4.128	179.153	0.87
916.51	3.852	167.175	0.78
916.54	3.066	133.063	0.54
916.67	2.3	99.8187	-0.49
917.11	4.759	206.538	1.07
918.04	3.227	140.05	0.49
918.43	2.727	118.35	0.33
920.56	4.515	195.948	0.8
924.89	0.784	34.0251	-0.28
928.07	0.266	11.5442	-0.56
929.86	0.2	8.67988	-0.62
948.68	0.269	11.6744	-0.5
953.89	0.326	14.1482	-0.67
954.97	0.514	22.3073	-0.63
957.87	0.22	9.54787	-0.58
961.92	3.135	136.057	0.42
963.22	4.655	202.024	1.05
964.04	3.461	150.205	0.56
966.38	2.02	87.6668	0.2
966.47	2.19	95.0447	0.08
967.23	4.505	195.514	0.83
969.15	2.04	88.5348	0.19
979.9	3.344	145.128	0.46
980.92	0.275	11.9348	-0.56
983.93	0.741	32.159	-0.43
984.21	0.386	16.7522	-0.62
986.46	0.48	20.8317	-0.7
988.33	0.294	12.7594	-0.59
988.93	0.379	16.4484	-0.42
989.01	0.959	41.62	-0.97
989.21	0.959	41.62	-0.32
989.64	0.236	10.2423	-0.65
989.78	0.427	18.5316	-0.92
991.05	2.479	107.587	0.19
991.23	0.259	11.2404	-0.99
994.82	0.361	15.6672	-0.5
996.79	2.3	99.8187	0.25
997.19	0.21	9.11388	-0.65
999.35	0.333	14.452	-0.55
999.63	0.248	10.7631	-0.68
1000.01	0.398	17.273	-0.76
[truncated: 657 more rows]

## Sheet: East Pacific
Water depth (m)	O2 ml/l	O2 umol/kg	d13C of DIC
0.1	4.503	195.428	1.48
0.9	4.581	198.813	1.47
0.99	4.616	200.332	1.5
1.09	4.669	202.632	1.52
1.19	4.766	206.842	1.49
1.39	4.729	205.236	1.71
1.49	4.963	215.391	1.86
1.59	4.563	198.032	1.59
1.59	5.016	217.691	1.69
1.69	4.676	202.936	1.97
1.79	4.738	205.626	1.82
1.89	4.754	206.321	1.85
1.99	4.551	197.511	1.4
2.09	4.947	214.697	1.4
2.19	5.101	221.38	1.55
2.29	4.943	214.523	1.79
2.29	4.986	216.389	1.95
2.39	4.839	210.01	1.87
2.88	4.908	213.004	1.36
2.98	4.984	216.303	1.95
3.18	4.963	215.391	2.01
3.88	4.583	198.9	1.64
5.77	4.673	202.805	1.56
5.87	4.632	201.026	1.5
7.26	4.678	203.022	1.6
7.36	4.581	198.813	1.48
7.36	4.651	201.851	1.6
7.95	4.641	201.417	1.6
7.96	4.641	201.417	1.4
8.05	4.669	202.632	1.7
8.15	4.538	196.947	1.6
8.65	4.637	201.243	1.2
8.65	4.533	196.73	1.6
8.84	4.871	211.399	1.5
8.85	4.768	206.928	1.7
8.95	4.393	190.654	1.1
9.54	4.904	212.831	1.5
9.54	4.841	210.097	1.6
9.54	4.83	209.619	1.8
9.55	4.621	200.549	1.6
9.55	4.736	205.54	1.6
9.74	4.828	209.532	1.7
9.94	4.782	207.536	1.7
10.04	4.835	209.836	1.7
10.04	4.809	208.708	1.8
10.04	4.835	209.836	1.8
10.14	4.761	206.625	1.7
10.23	4.717	204.715	1.7
10.24	4.54	197.033	1.43
10.43	4.855	210.704	1.6
10.63	4.938	214.306	1.9
10.74	4.459	193.518	1.34
11.03	4.807	208.621	1.7
15.71	4.673	202.805	1.54
19.29	4.43	192.259	1.35
23.85	4.848	210.4	1.7
24.36	4.798	208.23	1.7
24.56	4.589	199.16	1.4
24.76	4.639	201.33	1.3
24.96	4.733	205.409	1.6
25.06	3.894	168.997	1.1
25.34	4.83	209.619	1.8
25.46	4.618	200.419	1.5
25.95	4.214	182.885	1.1
30.43	4.409	191.348	1.38
37.49	4.501	195.341	1.32
39.18	4.361	189.265	1.31
42.86	4.492	194.95	1.39
44.25	3.696	160.404	0.79
47.33	4.682	203.196	1.34
48.02	4.892	212.31	1.7
48.33	2.5	108.499	0.7
49.29	4.899	212.614	1.7
49.52	1.83	79.4209	0.5
49.62	2.905	126.075	0.8
50.11	4.756	206.408	1.5
50.41	2.663	115.573	0.6
50.59	4.839	210.01	1.8
51.05	5.062	219.688	1.5
51.91	2.96	128.462	0.7
54.79	4.498	195.211	1.33
56.68	4.361	189.265	1.32
59.16	4.269	185.272	1.27
64.24	2.544	110.408	0.49
65.52	0.046	1.99637	-0.23
66.96	5.672	246.161	2
70.75	5.147	223.377	1.8
73.55	4.938	214.306	1.8
73.67	3.609	156.628	1.1
73.67	4.968	215.608	1.8
73.78	1.7	73.779	0.4
74.38	4.31	187.051	1.17
74.83	4.904	212.831	1.9
75.17	3.948	171.341	1.12
75.27	1.59	69.0051	0.4
75.96	1.67	72.477	0.4
77.04	4.94	214.393	1.8
77.66	4.319	187.442	1.29
79.74	1.57	68.1371	0.32
82.57	5.596	242.863	1.87
84.42	2.41	104.593	0.49
85.61	2.12	92.0068	0.62
86.3	3.757	163.052	1.01
86.8	4.037	175.203	1.14
90.68	1.49	64.6651	0.34
94.16	3.633	157.67	1
94.25	1.24	53.8153	0.26
95.05	0.423	18.358	-0.06
96.98	5.267	228.585	1.8
97.51	4.819	209.142	1.8
97.92	4.589	199.16	1.6
97.93	2.417	104.896	0.8
98.33	3.193	138.574	0.98
98.73	2.669	115.833	0.67
99.07	5.032	218.386	1.7
99.11	5.391	233.966	1.5
99.13	1.42	61.6272	0.3
99.33	1.75	75.949	0.5
99.68	5.019	217.822	1.9
100.09	4.078	176.983	1.01
100.42	1.71	74.213	0.4
101.02	2.951	128.072	0.7
104.1	2.18	94.6107	0.42
104.19	5.58	242.169	1.78
104.49	1.78	77.251	0.38
104.77	5.644	244.946	1.88
104.99	1.83	79.4209	0.41
105.69	2.22	96.3467	0.43
105.69	2.359	102.379	0.54
106.04	4.929	213.916	1.56
106.16	2.525	109.584	0.49
106.69	5.573	241.865	1.94
107.76	1.49	64.6651	0.49
107.8	5.495	238.48	1.85
112.34	0.966	41.9238	0.09
114.34	2.21	95.9127	0.38
115.23	1.86	80.7229	0.47
115.33	2.13	92.4408	0.52
115.93	1.86	80.7229	0.44
118.31	1.94	84.1949	0.63
122.88	1.3	56.4192	0.3
122.91	5.003	217.127	1.7
123.35	4.605	199.854	1.6
123.57	0.407	17.6636	0.1
123.78	1.28	55.5513	0.2
125.37	1.95	84.6289	0.55
126.12	2.312	100.339	0.53
126.36	1.74	75.515	0.41
127.26	2.04	88.5348	0.45
128.15	1.96	85.0629	0.57
129.63	0.237	10.2857	-0.13
136.2	1.88	81.5909	0.44
138.89	2.07	89.8368	0.57
138.98	1.65	71.609	0.39
144.35	2.15	93.3087	0.37
144.95	1.48	64.2311	0.36
145.94	1.68	72.911	0.42
146.41	5.322	230.972	1.78
146.54	2.12	92.0068	0.57
146.97	4.927	213.829	1.7
147.63	1.2	52.0793	0.3
147.79	4.255	184.665	1.4
147.83	1.24	53.8153	0.3
147.93	2.617	113.576	0.5
148.33	5.117	222.075	1.7
148.54	5.081	220.512	1.7
148.89	2.985	129.547	0.9
149.21	0.23	9.98187	0.1
150.14	5.283	229.279	1.5
151.01	1.33	57.7212	0.3
152.4	1.22	52.9473	0.3
152.95	0.03	1.30198	-0.08
153.83	5.336	231.579	1.76
154.08	0.835	36.2385	0.16
154.3	5.456	236.787	1.74
155.08	2.1	91.1388	0.37
158.26	1.59	69.0051	0.43
163.43	1.26	54.6833	0.09
167.5	1.08	46.8714	0.2
170.09	1.57	68.1371	0.3
172.37	1.12	48.6073	0.2
172.57	1.9	82.4589	0.48
173.65	0.22	9.54787	0.1
174.05	0.15	6.50991	-0.13
174.16	1.15	49.9093	0.13
174.56	1.33	57.7212	0.33
175.16	1.52	65.9671	0.27
182.23	1.55	67.2691	0.38
185.05	0.03	1.30198	-0.04
187.12	0.028	1.21518	-0.15
194.04	2.12	92.0068	0.5
195	0.099	4.29654	0.08
195.95	4.911	213.135	1.52
196.42	0.961	41.7068	0.2
196.42	1.66	72.043	0.42
196.71	1.25	54.2493	0.3
196.78	0.18	7.8119	0
197.02	1.73	75.081	0.4
197.26	2.548	110.582	0.7
198.12	4.752	206.234	1.6
198.67	4.933	214.089	1.4
199.1	0.814	35.3271	0.2
199.19	4.846	210.314	1.5
199.8	1.55	67.2691	0.28
199.8	1.86	80.7229	0.47
201.37	0.435	18.8787	0.1
201.38	0.301	13.0632	-0.12
201.78	0.86	37.3235	0.13
202.28	1.6	69.4391	0.36
202.96	0.626	27.168	0.09
203.86	5.09	220.903	1.66
204.47	1.54	66.8351	0.22
204.52	5.051	219.21	1.52
204.57	1.56	67.7031	0.25
204.86	1.46	63.3631	0.26
208.59	4.204	182.451	1.24
212.8	0.534	23.1753	0.1
213.81	0.557	24.1735	-0.04
220.36	1.53	66.4011	0.3
224.78	0.039	1.69258	-0.08
230.6	0.069	2.99456	-0.1
232.18	1.76	76.383	0.45
235.8	0.692	30.0324	0.2
238.66	0.028	1.21518	-0.12
243.81	0.444	19.2693	-0.08
244.09	0.051	2.21337	-0.17
248.07	0.586	25.4321	0.1
248.26	0.754	32.7232	0.3
248.28	1.23	53.3813	0.3
251.25	0.16	6.94391	-0.09
252.23	0.536	23.2621	0.06
252.5	0.248	10.7631	0.11
252.84	0.969	42.054	0.25
253.18	4.745	205.93	1.45
254.33	0.991	43.0088	0.08
254.63	0.741	32.159	-0.07
255.7	4.156	180.368	1.12
261.09	1.41	61.1932	0.39
264.65	4.579	198.726	1.25
281.2	0.085	3.68895	-0.01
283.74	0.356	15.4502	-0.13
286.42	0.071	3.08136	-0.06
286.7	1.13	49.0413	0.17
292.05	3.061	132.846	0.9
292.28	1.03	44.7014	0.22
296.94	0.23	9.98187	0
297.09	4.736	205.54	1.4
297.14	3.567	154.806	0.9
297.34	0.603	26.1698	0.1
297.94	0.414	17.9674	0
298.25	0.363	15.754	0.1
298.38	0.462	20.0505	0.1
298.51	0.345	14.9728	0.1
299.62	0.778	33.7647	0.15
299.92	0.11	4.77394	-0.14
300.12	0.674	29.2512	0.1
300.71	0.264	11.4574	0
300.71	0.524	22.7413	0
301.3	0.076	3.29836	-0.28
301.71	0.14	6.07592	-0.08
302.01	0.301	13.0632	-0.06
302.19	0.14	6.07592	-0.07
302.21	0.235	10.1989	-0.13
303.1	0.396	17.1862	-0.03
303.48	3.579	155.327	1
303.5	0.81	35.1535	0.19
303.67	0.053	2.30017	-0.04
304.03	3.857	167.392	1.02
304.37	0.058	2.51717	-0.16
304.42	0.269	11.6744	0.13
304.89	0.13	5.64192	-0.17
305.11	2.27	98.5167	0.55
328.96	0.1	4.33994	0.05
329.01	0.039	1.69258	-0.19
332.39	0.259	11.2404	-0.01
334.08	0.414	17.9674	-0.1
336.25	0.13	5.64192	-0.03
344.91	2.539	110.191	1.4
346	2.514	109.106	1.1
348.17	1.25	54.2493	0.3
348.58	0.568	24.6509	0.2
351.65	0.12	5.20793	-0.06
352.77	1.77	76.817	0.45
354.04	0.15	6.50991	-0.18
354.31	0.094	4.07955	-0.09
354.31	2.325	100.904	0.52
354.35	0.232	10.0687	0.1
354.98	0.062	2.69076	-0.08
356.55	0.798	34.6327	0.13
361.47	0.03	1.30198	-0.25
371.2	0.09	3.90595	-0.06
377.24	0.058	2.51717	-0.2
379.05	0.039	1.69258	-0.27
380.64	0.388	16.839	-0.17
384.12	0.267	11.5876	-0.16
393.22	0.046	1.99637	0.02
395.37	4.545	197.25	1.3
395.93	0.63	27.3416	0.1
397.21	0.803	34.8497	0.1
397.54	1.34	58.1552	0.4
397.62	0.469	20.3543	0
397.62	0.823	35.7177	0.2
398.14	0.515	22.3507	0.1
398.74	0.15	6.50991	0.02
398.9	0.14	6.07592	0
398.9	0.485	21.0487	0.1
399.23	1.66	72.043	0.4
400.16	0.13	5.64192	-0.1
400.88	0.1	4.33994	0
400.99	0.377	16.3616	0.08
401.78	0.15	6.50991	-0.14
401.96	1.86	80.7229	0.47
403.67	0.237	10.2857	0.09
403.98	2.394	103.898	0.48
404.07	0.22	9.54787	-0.19
404.24	0.028	1.21518	-0.18
404.79	0.11	4.77394	-0.04
405.19	2.16	93.7427	0.46
405.75	1.18	51.2113	0.16
411	0.067	2.90776	-0.24
422.53	0.313	13.584	-0.13
424.21	0.15	6.50991	-0.12
433.64	0.313	13.584	-0.14
448.58	0.058	2.51717	-0.01
451.8	0.087	3.77575	-0.16
451.9	0.426	18.4882	0.08
452.76	0.044	1.90957	-0.23
453.88	0.22	9.54787	-0.25
483.36	0.292	12.6726	-0.14
487.72	0.22	9.54787	-0.15
494.97	1.23	53.3813	0.2
495.34	1.84	79.8549	0.4
495.45	0.18	7.8119	-0.1
495.56	0.784	34.0251	0.1
495.85	0.317	13.7576	0
496.07	0.232	10.0687	0.09
496.16	0.738	32.0288	-0.2
496.67	2.958	128.375	0.8
497.01	0.264	11.4574	0
497.14	0.833	36.1517	0.1
497.35	0.492	21.3525	0.1
497.86	4.287	186.053	1
499.53	0.34	14.7558	-0.15
500.89	2.912	126.379	0.71
503.46	0.062	2.69076	-0.2
503.47	0.253	10.9801	0.09
503.6	0.322	13.9746	-0.17
503.98	0.462	20.0505	0.09
503.98	3.85	167.088	0.78
504.32	2.2	95.4787	0.4
504.63	3.13	135.84	0.71
510.72	0.099	4.29654	-0.24
525.91	0.12	5.20793	-0.19
527.57	0.14	6.07592	-0.1
530.21	0.356	15.4502	0.03
542.78	0.476	20.6581	-0.15
551.61	0.49	21.2657	0.06
552.49	0.538	23.3489	-0.16
571.44	0.22	9.54787	-0.1
576.7	0.586	25.4321	-0.05
592.46	0.23	9.98187	0.04
593.49	1.8	78.119	0.4
594.42	2.613	113.403	0.7
594.85	1.38	59.8912	0.2
596.02	0.589	25.5623	0
597.27	1.36	59.0232	0.2
597.41	0.92	39.9275	0.1
598.12	4.775	207.232	1.2
599.11	0.669	29.0342	-0.03
599.47	3.602	156.325	0.68
600.4	1.31	56.8532	0.04
600.85	2.302	99.9055	0.42
602.78	0.752	32.6364	-0.1
602.83	0.324	14.0614	0.07
602.98	0.69	29.9456	-0.11
603.25	4.789	207.84	1
603.53	0.21	9.11388	-0.16
604.31	0.619	26.8642	0.14
604.32	3.547	153.938	0.79
610.09	0.2	8.67988	-0.22
613.78	0.511	22.1771	0.1
627.62	0.22	9.54787	-0.18
649.37	0.347	15.0596	-0.16
651.07	0.784	34.0251	-0.09
651.45	0.623	27.0378	-0.18
651.76	0.577	25.0415	0.02
692.71	2.09	90.7048	0.4
693.34	1.18	51.2113	0.2
693.48	1.6	69.4391	0.3
693.66	0.593	25.7359	0.1
693.97	0.888	38.5387	0.1
694.27	1.15	49.9093	0.2
696.96	1.58	68.5711	0.2
697.04	5.209	226.068	1.3
697.56	0.909	39.4501	-0.01
697.87	1.23	53.3813	0.2
698.01	3.257	141.352	0.74
699.21	0.623	27.0378	0.02
699.52	1.9	82.4589	0.28
700.95	0.54	23.4357	0.01
702.02	0.874	37.9311	0.05
702.56	4.715	204.628	0.99
702.61	0.658	28.5568	0.07
702.76	0.637	27.6454	-0.11
702.81	0.826	35.8479	-0.11
703.27	3.105	134.755	0.63
709.72	0.605	26.2566	-0.13
723.01	0.593	25.7359	-0.16
726.5	0.961	41.7068	0.06
726.54	0.375	16.2748	-0.23
751.06	1.03	44.7014	-0.15
751.76	1.07	46.4374	0.03
783.51	0.722	31.3344	0.02
786.7	0.517	22.4375	0.01
788.41	1.21	52.5133	0.1
792.48	1.38	59.8912	0.1
793.16	1.61	69.8731	0.2
793.73	1.85	80.2889	0.3
794.07	1.53	66.4011	0.2
794.46	0.964	41.837	0.1
794.73	4.614	200.245	1.1
794.86	1.51	65.5331	0.1
795.85	1.09	47.3054	-0.03
796.41	2.645	114.791	0.47
797.13	0.798	34.6327	-0.15
798.34	1.87	81.1569	0.26
799.62	0.713	30.9438	0.06
801.11	1.16	50.3433	0.08
802.02	4.112	178.458	0.79
802.57	2.636	114.401	0.44
802.65	1.13	49.0413	0.12
802.79	1.16	50.3433	0.05
803.28	1.09	47.3054	-0.09
809.4	0.98	42.5314	-0.16
826.7	0.621	26.951	-0.21
850.63	1.39	60.3252	0.03
867.38	0.865	37.5405	0
869.63	0.989	42.922	-0.11
876.58	1.32	57.2872	0.08
884.74	0.904	39.2331	-0.01
891.14	1.88	81.5909	0.2
892.42	1.67	72.477	0.1
892.51	2.431	105.504	0.4
893.96	4.016	174.292	0.9
894.78	1.17	50.7773	0
894.8	1.38	59.8912	-0.04
899.38	1.72	74.647	0.19
899.93	1	43.3994	0.06
901.46	1.34	58.1552	-0.06
901.63	1.36	59.0232	0.06
901.82	2.445	106.112	0.3
902.43	3.319	144.043	0.61
902.82	1.38	59.8912	-0.1
904.03	1.19	51.6453	0.11
926.22	0.771	33.461	-0.23
936.88	1.32	57.2872	-0.04
942.61	1.03	44.7014	-0.18
949.84	1.42	61.6272	0.05
950.73	1.49	64.6651	-0.08
951.43	1.38	59.8912	0.07
983.93	1.15	49.9093	0.06
986.91	3.404	147.732	0.6
989.29	1.7	73.779	0.1
992.03	1.56	67.7031	0.1
992.36	1.84	79.8549	0.1
992.73	1.91	82.8929	0.2
993.74	2.29	99.3847	0.33
993.9	1.41	61.1932	-0.08
993.97	1.22	52.9473	0
994.59	1.8	78.119	0.1
996.72	1.88	81.5909	0.1
1000.28	1.26	54.6833	0.1
1000.83	1.4	60.7592	0.06
1001.64	1.33	57.7212	-0.11
1001.8	2.801	121.562	0.39
1001.91	2.422	105.113	0.27
1009	1.55	67.2691	-0.17
1020.68	1.18	51.2113	-0.02
1026.38	1.01	43.8334	-0.17
1041.97	1.21	52.5133	-0.21
1048.32	1.55	67.2691	0.03
1050.5	1.51	65.5331	0
1051.08	1.54	66.8351	-0.07
1051.69	1.86	80.7229	0.1
1052.24	1.47	63.7971	0.04
1059.8	1.48	64.2311	-0.04
1089.19	1.97	85.4969	0.2
1089.37	1.78	77.251	0.1
1089.4	3.034	131.674	0.5
1091.37	1.68	72.911	0
1091.73	1.24	53.8153	0
1093.74	1.54	66.8351	-0.1
1100.37	1.53	66.4011	0
1102.25	1.53	66.4011	-0.21
1108.63	1.62	70.3071	-0.16
1142.49	2.424	105.2	0.31
1143.44	2.25	97.6487	0.16
1148.53	1.73	75.081	-0.05
1149.93	1.64	71.175	-0.17
1150.63	1.02	44.2674	-0.2
1151.01	2.484	107.804	0.17
1182.94	1.56	67.7031	0
1183.24	1.42	61.6272	-0.17
1187.1	1.95	84.6289	0.1
1187.37	2.11	91.5728	0.1
1188.49	1.98	85.9308	0.1
1188.57	1.8	78.119	0
1189.15	1.95	84.6289	0.1
1189.46	2.339	101.511	0.2
1189.65	1.36	59.0232	-0.1
1189.87	2.801	121.562	0.4
1190.03	1.96	85.0629	0.1
1190.4	2.01	87.2328	0.1
1199.57	1.61	69.8731	-0.02
1199.66	1.66	72.043	-0.01
1200.25	1.78	77.251	0.01
1200.45	1.65	71.609	-0.17
1201.26	2.525	109.584	0.22
1201.94	1.66	72.043	-0.13
1208.42	1.64	71.175	-0.19
1237.21	1.52	65.9671	-0.25
1243.75	1.71	74.213	-0.12
1248.4	1.72	74.647	-0.04
1282.5	1.54	66.8351	-0.17
1287.72	2.19	95.0447	0.1
1288.09	1.98	85.9308	0
1290.08	1.55	67.2691	-0.1
1290.54	2.657	115.312	0.25
1290.6	2.05	88.9688	0.1
1292.32	2.47	107.197	0.17
1300.4	1.7	73.779	-0.08
1300.7	1.2	52.0793	-0.32
1347.92	1.76	76.383	-0.06
1348.52	1.76	76.383	-0.09
1379.41	2.12	92.0068	0.1
1379.53	1.68	72.911	-0.15
1383.65	1.85	80.2889	0.02
1386.65	2.06	89.4028	0
1386.92	2.06	89.4028	0
1387.38	2.06	89.4028	0
1389.2	2.19	95.0447	0.1
1398.26	1.83	79.4209	-0.01
1401.77	1.8	78.119	-0.08
1407.94	1.86	80.7229	-0.38
1439.13	2.65	115.008	0.16
1476.23	1.81	78.5529	-0.21
1486.48	2.28	98.9507	0
1501.22	1.89	82.0249	-0.05
1540.9	1.85	80.2889	-0.26
1581.95	2.341	101.598	0.1
1583.25	2.17	94.1767	0
1583.85	2.394	103.898	0.1
1583.98	3.473	150.726	0.4
1584.94	2.604	113.012	0.1
1585	2.397	104.028	0
1585.98	1.84	79.8549	-0.1
1585.98	2.26	98.0827	-0.1
1601.14	2.12	92.0068	-0.08
1701.46	2.05	88.9688	-0.13
1780.05	2.617	113.576	0.1
1781.14	2.663	115.573	0.1
1782.67	2.502	108.585	0
1783.81	2.26	98.0827	-0.1
1901.02	2.19	95.0447	-0.07
1974.28	2.473	107.327	-0.1
1975.01	2.344	101.728	-0.1
1977.84	2.854	123.862	0
1978.21	3.317	143.956	0.2
1979	2.26	98.0827	-0.1
1979.21	3.579	155.327	0.3
1979.46	2.654	115.182	0
1992.35	2.27	98.5167	-0.26
2102.46	2.328	101.034	-0.14
2215.69	2.502	108.585	-0.1
2222.38	3.257	141.352	0.2
2225.34	2.657	115.312	-0.1
2225.68	3.057	132.672	0
2227.46	2.581	112.014	0
2301.34	2.436	105.721	-0.1
2466.91	3.636	157.8	0.2
2468	3.457	150.032	0.2
2469.61	3.252	141.135	0.1
2469.84	3.445	149.511	0.2
2471.05	2.808	121.866	0
2472.47	2.65	115.008	-0.1
2571.7	3.574	155.11	0.1
2700.24	2.512	109.019	-0.07
2708.05	3.48	151.03	0.2
2714.83	3.229	140.137	0.1
2716.34	2.893	125.555	0
2718.33	2.654	115.182	-0.1
2766.46	3.116	135.233	0
2888.47	2.512	109.019	-0.1
2959.05	3.505	152.115	0.1
2959.3	3.441	149.337	0.2
2959.38	3.181	138.054	0.1
2961.07	2.776	120.477	0
2961.27	3.153	136.838	0
2961.76	3.252	141.135	0
2961.93	3.057	132.672	0
3199.12	3.754	162.921	0.3
3199.49	3.418	148.339	0.1
3205.81	3.1	134.538	0
3206.27	3.218	139.659	0.1
3209.03	3.064	132.976	0
3332.83	3.76	163.182	0.3
3449.91	3.126	135.667	0
3449.96	3.452	149.815	0.1
3452.01	3.294	142.958	0.1
3452.09	3.374	146.43	0
3454.65	3.549	154.025	0.1
3672.88	3.503	152.028	0.1
3691.77	3.434	149.034	0.1
3693.63	3.123	135.536	-0.1
3695.3	3.484	151.204	0.1
3697.36	3.413	148.122	0.1
3937.59	3.162	137.229	0.1
3938.68	3.434	149.034	0.1
3940.07	3.452	149.815	0.1
3940.22	3.146	136.535	-0.1
3942.44	3.597	156.108	0.1
4056.05	3.622	157.193	0.2
4059.45	3.436	149.12	0.1
4077.58	3.413	148.122	0.1
4227.3	3.162	137.229	0
4276.3	3.146	136.535	0

## Sheet: Indian and West Pacific
Water depth (m)	O2 ml/l	O2 umol/kg	d13C of DIC
1.19	4.781	207.493	0.71
1.79	4.959	215.218	1.5
1.89	4.577	198.639	1
1.99	4.46	193.561	1.4
2.09	4.584	198.943	1.4
2.29	4.51	195.731	1.4
2.29	4.513	195.862	1.3
2.29	4.607	199.941	1.1
2.39	4.584	198.943	1.2
2.49	4.565	198.118	1.3
2.78	4.639	201.33	1.3
2.88	5.053	219.297	1.5
3.08	4.552	197.554	1.2
3.18	4.618	200.419	1.3
3.18	4.632	201.026	1.3
3.18	4.77	207.015	1.3
3.38	5.131	222.682	1.2
3.38	5.387	233.793	1.4
3.48	4.692	203.63	1.2
3.68	4.828	209.532	1.3
3.88	4.565	198.118	0.5
3.88	4.584	198.943	1.2
4.27	4.855	210.704	1.1
4.47	4.882	211.876	1.61
4.57	4.774	207.189	1.26
4.67	4.673	202.805	1.54
4.77	4.805	208.534	1.1
4.97	4.733	205.409	1.27
5.07	4.653	201.937	1.3
5.17	5.013	217.561	0.96
5.17	5.143	223.203	0.99
5.27	4.743	205.843	1.5
5.47	4.805	208.534	1.25
5.57	4.766	206.842	1.1
5.76	4.867	211.225	1.2
5.95	5.414	234.964	1.54
5.95	6.037	262.002	1.66
5.95	6.284	272.722	1.54
5.95	6.327	274.588	1.84
5.95	6.635	287.955	1.82
5.97	4.441	192.737	1.67
5.97	4.467	193.865	1.79
5.97	4.478	194.343	1.69
5.97	4.49	194.863	1.71
6.06	4.754	206.321	1.27
6.07	4.752	206.234	1.6
6.16	4.71	204.411	1.26
6.16	4.749	206.104	1
6.26	4.752	206.234	1.24
6.65	5.005	217.214	1.2
6.86	4.71	204.411	1.18
6.86	4.841	210.097	1.05
6.94	6.261	271.724	2.18
6.94	6.417	278.494	2.13
6.94	6.589	285.959	1.63
6.94	6.608	286.783	1.77
6.94	6.624	287.478	1.9
6.95	4.69	203.543	1.22
6.95	4.736	205.54	1.41
6.95	4.795	208.1	1.36
6.95	4.841	210.097	1.28
6.95	5.074	220.209	1.37
6.95	5.255	228.064	1.35
6.95	5.587	242.473	1.59
6.96	4.46	193.561	1.82
6.96	4.473	194.126	1.53
6.96	4.506	195.558	1.53
6.96	4.545	197.25	1.73
6.96	4.598	199.551	1.73
6.96	4.708	204.324	1.26
6.96	5.005	217.214	1.44
7.06	4.791	207.927	1.21
7.06	4.863	211.051	1.2
7.16	4.932	214.046	1.04
7.16	5.104	221.511	1.12
7.35	4.828	209.532	1.17
7.35	4.846	210.314	1.2
7.45	4.901	212.701	1.3
7.46	4.96	215.261	1
7.55	4.745	205.93	1.4
7.66	4.878	211.702	1.5
7.66	5.143	223.203	1.33
7.75	4.729	205.236	1.25
7.86	4.657	202.111	1.4
7.93	6.546	284.093	1.85
7.93	6.638	288.085	1.61
7.95	4.621	200.549	1.44
7.96	4.446	192.954	1.77
7.96	4.841	210.097	1.4
8.05	4.662	202.328	1.3
8.15	4.616	200.332	1.3
8.25	4.584	198.943	1.3
8.35	4.648	201.72	1.5
8.35	4.761	206.625	1.5
8.45	4.607	199.941	1.3
8.45	4.7314	205.34	1.023
8.45	4.784	207.623	1.23
8.55	4.692	203.63	1.3
8.55	4.717	204.715	1.2
8.55	4.95	214.827	1.5
8.65	4.621	200.549	1.4
8.75	4.63	200.939	0.7
8.85	4.667	202.545	1.3
8.85	4.8262	209.454	1.086
8.95	4.623	200.636	1.2
8.95	4.701	204.021	1.3
9.04	4.74	205.713	1.26
9.04	4.878	211.702	1.3
9.14	4.543	197.164	1.27
9.14	4.6864	203.387	1.071
9.15	4.451	193.171	1.3
9.44	4.708	204.324	1.4
9.44	4.7691	206.976	1.088
9.44	4.807	208.621	1.5
9.74	4.485	194.646	1.3
9.74	4.7014	204.038	1.09
9.84	4.559	197.858	1.3
9.84	4.6623	202.341	1.081
9.84	4.739	205.67	1.048
9.94	4.6197	200.492	1.069
10	4.7989	208.269	1.053
10.04	4.6626	202.354	1.132
10.04	4.8556	210.73	0.972
10.04	4.866	211.182	1.41
10.1	4.7473	206.03	1.066
10.14	4.6449	201.586	1.104
10.14	4.722	204.932	1.033
10.14	4.8411	210.101	1.001
10.24	4.6635	202.393	1.036
10.34	4.8471	210.361	1.032
10.43	4.82	209.185	1.061
10.44	4.6777	203.009	1.044
10.44	4.6956	203.786	1.098
10.44	4.801	208.361	1.11
10.44	4.84	210.053	1.37
10.74	4.832	209.706	1.3
11.03	4.694	203.717	1.5
11.04	4.687	203.413	1.3
11.24	4.735	205.496	1.13
11.33	4.729	205.236	1.2
11.34	4.552	197.554	1.3
11.34	4.813	208.881	1.23
11.44	4.885	212.006	1.3
11.53	4.723	204.975	1.35
11.53	4.785	207.666	1.44
11.53	4.876	211.616	0
11.63	4.492	194.95	1.4
11.63	4.821	209.229	1.4
11.73	4.935	214.176	1.15
11.83	4.572	198.422	1.3
11.83	4.648	201.72	0.9
12.03	4.589	199.16	1.3
12.32	4.616	200.332	1.35
12.33	4.662	202.328	1
12.41	4.931	214.003	1.2
12.53	4.759	206.538	1.3
12.73	4.728	205.192	1.25
12.93	4.876	211.616	1.3
13.12	4.927	213.829	0.9
13.22	4.731	205.323	1.25
13.32	4.595	199.42	1.39
13.71	4.802	208.404	1.2
13.71	4.894	212.397	1.2
13.91	4.478	194.343	1.5
14.22	4.621	200.549	1.6
14.42	4.731	205.323	0.9
14.89	4.961	215.305	1.3
15.02	4.784	207.623	1.5
15.87	6.369	276.411	1.58
15.98	4.901	212.701	1.2
16.1	4.74	205.713	1.3
16.18	4.83	209.619	1.2
16.19	4.823	209.315	1.3
16.68	4.913	213.221	1.3
16.81	4.865	211.138	1.5
16.9	4.611	200.115	1.5
17.6	4.865	211.138	1.4
18.98	4.881	211.833	1.2
19.69	4.869	211.312	1.5
19.79	4.775	207.232	1.5
19.85	5.311	230.494	1.49
19.89	4.517	196.035	1.71
19.89	4.589	199.16	1.75
20.29	4.927	213.829	1.5
20.81	6.514	282.704	1.76
20.82	6.838	296.765	1.7
20.85	4.816	209.012	1.31
20.85	4.92	213.525	1.35
20.87	4.611	200.115	1.43
20.88	4.46	193.561	1.66
20.88	4.467	193.865	1.77
21.74	4.853	210.617	1.2
21.85	4.692	203.63	1.31
21.86	4.773	207.145	1.4
21.87	4.469	193.952	1.52
21.88	4.411	191.435	1.83
21.88	4.439	192.65	1.77
21.88	4.487	194.733	1.67
21.88	4.657	202.111	1.76
22.82	5.437	235.963	1.76
25.79	7.277	315.818	1.36
26.62	4.862	211.008	1.1
27.33	4.996	216.823	1.2
28.04	4.792	207.97	1.23
30.62	4.892	212.31	1.3
31.12	4.957	215.131	1.57
31.32	4.503	195.428	1.3
31.52	4.694	203.717	1.2
31.91	4.823	209.315	1.3
32.12	4.84	210.053	1.28
34.8	4.494	195.037	1.4
36.89	4.637	201.243	1.2
37.48	4.791	207.927	1.2
40.27	4.096	177.764	1
40.57	4.618	200.419	1.2
43.7	4.699	203.934	1.31
44.62	7.613	330.4	0.98
44.67	5.925	257.142	1.26
44.7	4.789	207.84	1.4
44.75	4.519	196.122	1.76
45.59	7.464	323.933	0.9
45.62	7.372	319.941	1
45.63	7.332	318.205	1.15
45.73	4.478	194.343	1.52
45.74	4.464	193.735	1.77
45.74	4.568	198.249	1.83
45.74	4.589	199.16	1.64
46.6	5.145	223.29	1.2
46.63	6.449	279.883	1.12
46.66	4.848	210.4	1.2
46.7	5.283	229.279	1.38
46.73	4.444	192.867	1.66
46.74	4.441	192.737	1.79
46.83	4.073	176.766	1.1
46.84	4.993	216.693	1.5
47.13	4.913	213.221	1.5
47.65	5.039	218.69	1.34
47.78	5.603	243.167	1.5
48.24	4.729	205.236	1
48.3	5.0541	219.345	1.092
48.6	4.7932	208.022	1.066
48.69	5.0229	217.991	1.016
48.89	5.0215	217.93	0.989
49.09	5.1202	222.214	1.046
49.11	4.729	205.236	1.2
49.18	4.754	206.321	1.4
49.19	4.932	214.046	1.07
49.39	4.859	210.878	1.075
49.39	4.862	211.008	1.031
49.39	4.9355	214.198	1.105
49.39	4.9956	216.806	1.141
49.59	5.1106	221.797	1.074
49.69	5.0752	220.261	1.018
49.78	4.8942	212.405	0.985
49.79	1.2	52.0793	0.1
49.79	5.0755	220.274	1.06
49.89	4.957	215.131	1.061
49.89	5.0114	217.492	1.157
50.28	4.7427	205.83	1.149
50.9	4.899	212.614	1.058
50.98	3.059	132.759	0.4
51.27	5.327	231.189	1.3
51.5	4.515	195.948	1.2
51.78	4.945	214.61	1.3
51.81	4.441	192.737	1.3
51.85	5.338	231.666	0.71
51.99	4.506	195.558	0.9
52.08	2.988	129.677	0.1
52.16	5.189	225.2	1.2
52.29	4.786	207.71	1.5
54.19	4.713	204.541	1.6
54.95	4.784	207.623	1.21
55.45	4.791	207.927	1.22
55.69	4.598	199.551	1.1
56.07	4.756	206.408	0.8
56.18	4.423	191.956	1.3
56.38	4.77	207.015	1.4
56.67	4.425	192.042	1.3
56.67	4.634	201.113	1.13
56.77	4.113	178.502	1.17
57.08	4.782	207.536	1.3
57.54	4.816	209.012	1.21
57.67	3.011	130.676	0.69
58.16	4.667	202.545	1.1
58.45	3.839	166.61	0.9
58.46	1.88	81.5909	0.41
58.67	4.973	215.825	1.3
58.87	4.841	210.097	1.4
59.05	1.28	55.5513	0.09
59.16	3.188	138.357	0.59
59.26	4.773	207.145	1.4
59.41	4.862	211.008	1.4
59.45	2.18	94.6107	0.42
59.45	3.638	157.887	0.74
59.46	4.852	210.574	1.49
59.61	4.832	209.706	1.34
60	4.94	214.393	1.4
60.05	4.879	211.746	1.09
60.35	4.402	191.044	1.4
60.35	4.865	211.138	1
60.36	4.331	187.963	1
60.45	4.179	181.366	0.9
60.75	0.661	28.687	0
60.85	4.538	196.947	1.3
61.07	4.883	211.919	1.3
61.24	4.913	213.221	1.5
61.45	3.59	155.804	0.7
61.45	4.499	195.254	0.1
61.52	3.54	153.634	0.8
61.94	3.889	168.78	0.9
61.94	4.163	180.672	1.34
62.04	4.935	214.176	1.21
62.41	4.831	209.663	1.26
62.63	1.04	45.1354	0.02
63.33	4.246	184.274	1.2
64.63	2.344	101.728	0.5
65.08	5.163	224.071	1.2
65.62	2.11	91.5728	0.4
66.19	4.816	209.012	1.1
66.42	3.376	146.516	0.8
66.68	5.219	226.502	1.3
67.29	2.604	113.012	0.5
67.51	2.785	120.867	0.6
67.61	4.269	185.272	1.61
67.7	4.545	197.25	1.1
67.9	4.775	207.232	1.1
68.61	4.393	190.654	1.65
69.3	2.07	89.8368	0.4
69.42	6.997	303.666	0.8
69.6	4.453	193.258	1.45
69.6	4.584	198.943	1.61
69.6	4.703	204.107	1.67
69.8	3.199	138.835	0.8
70.47	5.184	224.983	0.76
70.5	5.485	238.046	1.24
70.52	5.752	249.633	1.29
70.53	4.814	208.925	1.38
70.55	5.255	228.064	1.28
70.58	4.703	204.107	1.52
70.59	4.605	199.854	1.64
70.8	3.22	139.746	0.8
71.39	7.498	325.409	0.85
71.42	7.073	306.964	0.61
71.47	4.411	191.435	0.93
71.59	3.795	164.701	1.32
71.59	4.536	196.86	1.59
71.59	4.791	207.927	1.77
72.29	4.933	214.089	1.4
73.68	3.33	144.52	0.8
74.47	0.294	12.7594	-0.23
74.82	3.052	132.455	0.7
75.27	2.507	108.802	0.1
75.36	4.094	177.677	1.2
75.49	5.656	245.467	1.5
76.46	4.651	201.851	1.3
76.84	0.8	34.7195	0
76.92	4.283	185.88	1
77.1	5.26	228.281	1.2
80.21	3.668	159.189	1
80.21	4.724	205.019	1.1
80.72	3.356	145.648	0.8
81.11	4.464	193.735	1.3
81.88	0.06	2.60397	-0.2
84.51	1.97	85.4969	0.3
85.5	2.371	102.9	0.3
86.32	5.377	233.359	1.1
86.59	3.314	143.826	0.6
86.82	5.007	217.301	1.1
88.97	3.434	149.034	0.8
89.48	2.697	117.048	0.6
89.57	1.08	46.8714	0.14
89.68	2.14	92.8748	0.5
89.97	4.554	197.641	1.1
90.17	0.794	34.4591	0.08
90.27	2.16	93.7427	0.3
90.28	2.652	115.095	0.6
90.57	4.742	205.8	1.09
90.6	5.23	226.979	1.2
90.77	1.15	49.9093	0.1
90.97	3.776	163.876	0.99
91.17	1.32	57.2872	0.2
91.46	2.461	106.806	0.6
91.56	1.2	52.0793	0.11
92.02	4.836	209.88	1.04
92.36	5.734	248.852	1.17
93.32	4.733	205.409	1.1
93.34	2.795	121.301	0.5
93.63	4.057	176.071	0.9
94.14	4.664	202.415	1
94.21	6.944	301.366	0.75
94.25	6.001	260.44	0.69
94.36	5.161	223.984	1.34
94.45	4.269	185.272	1.4
94.46	2.981	129.374	0.95
94.78	4.957	215.131	1.1
95.13	7.091	307.745	0.47
95.24	2.581	112.014	0.4
95.25	3.611	156.715	1.1
95.34	4.508	195.645	1.2
95.39	4.92	213.525	1.2
95.42	4.736	205.54	1.5
95.44	4.46	193.561	1.41
95.45	3.006	130.459	0.91
95.45	3.542	153.721	1.11
95.54	1.92	83.3269	0.27
96.09	4.441	192.737	1
96.1	5.014	217.605	1.3
96.14	4.207	182.581	1.1
96.17	7.369	319.81	0.74
96.19	0.301	13.0632	-0.2
96.21	6.99	303.362	0.81
96.24	4.531	196.643	1.2
96.27	5.249	227.804	0.77
96.31	5.4	234.357	1.15
96.37	5.007	217.301	0.99
96.44	2.861	124.166	0.88
96.44	3.682	159.797	1.27
96.44	3.728	161.793	1.38
96.44	4.225	183.363	1.31
96.58	4.106	178.198	0.8
96.63	4.269	185.272	1.3
96.64	4.301	186.661	1.2
97.24	2.889	125.381	0.7
97.52	2.486	107.891	0.47
97.53	1.66	72.043	0.28
97.66	0.069	2.99456	-0.2
97.78	5.1928	225.364	1.081
98.02	1.81	78.5529	0.1
98.27	4.365	189.438	0.87
98.27	5.0316	218.369	1.017
98.53	3.76	163.182	1.1
98.77	4.798	208.23	0.879
98.77	5.1009	221.376	1.04
98.91	3.34	144.954	0.7
98.97	5.1627	224.058	1.072
99.1	5.329	231.275	1.2
99.26	4.4498	193.119	0.62
99.3	5.1007	221.367	1.017
99.37	4.7011	204.025	0.892
99.43	5.124	222.379	1.1
99.5	4.8443	210.24	0.934
99.52	1.49	64.6651	0.2
99.56	4.8721	211.446	1.055
99.56	4.9582	215.183	1.022
99.66	5.1184	222.136	1.064
99.76	4.661	202.285	0.886
99.96	4.9267	213.816	1.008
100.07	3.708	160.925	0.6
100.11	2.758	119.696	0.6
100.11	3.344	145.128	0.7
100.12	5.224	226.719	0.84
100.16	4.3601	189.226	0.946
100.22	3.563	154.632	0.8
100.28	0.044	1.90957	-0.2
100.32	5.596	242.863	1.5
100.36	4.737	205.583	0.87
100.46	4.9249	213.738	1.052
100.46	5.2102	226.12	0.989
100.61	1.99	86.3648	0.2
100.62	2.08	90.2708	0.4
100.69	0.14	6.07592	-0.2
100.95	4.886	212.05	1.047
101.28	5.143	223.203	1.5
101.46	0.299	12.9764	-0.3
101.69	0.66	28.6436	0.1
101.9	1.76	76.383	0.15
102.03	5.297	229.887	1.2
102.11	4.533	196.73	1.4
104.03	5.019	217.822	1.15
104.21	4.053	175.898	0.7
104.21	4.22	183.146	0.9
104.48	0.294	12.7594	-0.07
105.03	4.862	211.008	1.11
105.03	5.111	221.814	1.16
105.23	4.933	214.089	1.07
105.32	4.922	213.612	1.15
105.33	4.938	214.306	1.13
105.42	4.862	211.008	1.16
105.47	5.06	219.601	1.2
105.59	3.956	171.688	1.1
106.12	4.8	208.317	1.12
106.21	3.434	149.034	0.63
106.52	4.982	216.216	1.17
106.57	2.969	128.853	0.5
106.62	5.069	219.992	1.09
106.68	4.519	196.122	1.2
106.69	5.055	219.384	1.3
106.72	4.832	209.706	1.1
107.01	4.032	174.986	0.82
107.01	5.122	222.292	1.05
107.02	4.561	197.945	1
107.16	3.266	141.742	0.6
107.41	4.961	215.305	0.87
107.51	4.807	208.621	1
107.66	2.788	120.998	0.5
107.88	3.935	170.777	1.1
107.9	4.901	212.701	1.1
107.97	4.08	177.07	1.2
108.18	5.085	220.686	1.1
108.21	4.83	209.619	1.09
108.27	3.956	171.688	1.1
109.14	2.983	129.46	0.5
109.48	4.308	186.965	0.8
109.74	4.57	198.335	1.2
110.01	5.097	221.207	1.1
111.05	5.078	220.382	1.5
111.98	4.618	200.419	0.99
112.34	0.455	19.7467	-0.1
114.24	1.79	77.685	0.4
115.52	1.47	63.7971	0.2
115.62	2.711	117.656	0.57
116.51	1.87	81.1569	0.27
117.1	5.297	229.887	0.72
117.61	4.467	193.865	0.9
118.1	0.301	13.0632	-0.06
118.18	0.471	20.4411	-0.11
118.19	5	216.997	1.24
118.31	3.257	141.352	1.01
118.91	3.675	159.493	-0.42
118.99	6.767	293.684	0.72
119.05	5.973	259.225	0.64
119.19	0.356	15.4502	-0.13
119.23	4.393	190.654	1.03
119.29	1.33	57.7212	0.1
119.3	3.618	157.019	1.03
119.31	2.972	128.983	0.85
119.31	3.006	130.459	0.87
119.49	2.624	113.88	0.5
119.6	3.229	140.137	0.7
119.7	2.594	112.578	0.4
119.8	2.353	102.119	0.5
119.99	4.457	193.431	1.01
120.01	6.484	281.402	0.63
120.08	0.28	12.1518	-0.09
120.13	4.998	216.91	0.95
120.18	4.478	194.343	1.02
120.26	4.657	202.111	1.4
120.29	3.839	166.61	0.97
120.3	3.146	136.535	1
120.3	3.632	157.627	1.67
120.78	4.863	211.051	1.12
120.95	6.017	261.134	0.34
121.09	4.271	185.359	0.84
121.19	4.635	201.156	1.09
121.2	4.883	211.919	0.91
121.28	1.71	74.213	0.3
121.29	2.972	128.983	1.03
122.27	1.81	78.5529	0.3
122.62	4.721	204.889	1.02
122.94	3.618	157.019	0.6
122.95	3.075	133.453	0.6
123.47	0.764	33.1572	0
124.87	0.345	14.9728	0
125.34	2.23	96.7807	0.3
125.37	2.04	88.5348	0.4
125.37	3.202	138.965	0.7
125.44	5.189	225.2	0.74
125.66	1.63	70.741	0.2
130.02	4.821	209.229	1.1
130.33	0.646	28.036	0
130.52	0.34	14.7558	0
130.78	4.039	175.29	0.9
130.96	0.01	0.433994	-0.3
131.6	2.519	109.323	0.3
131.83	3.059	132.759	0.7
134.71	4.232	183.666	0.9
135.01	1.87	81.1569	0.3
135.86	5.187	225.113	1.1
136.32	4.791	207.927	1.1
138.95	2.705	117.395	0.4
140.51	0.09	3.90595	-0.3
143.01	4.655	202.024	1.05
143.16	3.303	143.348	0.89
143.77	6.514	282.704	0.58
143.89	5.329	231.275	0.68
143.98	4.984	216.303	0.8
144.11	4.384	190.263	1.07
144.14	3.42	148.426	0.82
144.15	3.047	132.238	0.96
144.66	1.47	63.7971	-0.64
144.73	3.374	146.43	-0.26
144.8	5.787	251.152	0.45
144.83	5.856	254.147	0.4
144.91	4.181	181.453	0.77
145.04	4.906	212.918	0.76
145.06	4.515	195.948	0.98
145.13	2.974	129.07	0.55
145.14	2.914	126.466	1.04
145.14	3.549	154.025	0.88
145.15	2.981	129.374	0.84
145.15	3.029	131.457	0.79
145.15	3.146	136.535	1.01
145.44	3.381	146.733	1
145.54	3.597	156.108	1
145.58	4.736	205.54	1
145.6	4.901	212.701	0.9
145.7	5.297	229.887	1.4
146.01	4.821	209.229	1.04
146.09	3.885	168.607	0.6
146.62	2.2	95.4787	0.31
146.76	4.786	207.71	1
147.53	4.0801	177.074	0.639
147.59	4.945	214.61	1
147.99	4.924	213.699	0.9
148.01	1.78	77.251	0.22
148.02	4.677	202.979	0.665
148.33	4.3945	190.719	0.744
148.33	5.007	217.301	1
148.4	2.995	129.981	0.5
148.43	3.6249	157.319	0.565
148.51	1.85	80.2889	0.2
148.6	3.02	131.066	0.6
148.73	4.4331	192.394	0.867
149.1	0.565	24.5207	-0.01
149.3	0.335	14.5388	-0.04
149.4	0.14	6.07592	-0.2
149.4	0.553	23.9999	-0.05
149.4	4.808	208.664	0.905
149.42	1.05	45.5694	0.2
149.43	4.418	191.739	0.861
149.53	4.5549	197.68	0.828
149.62	4.3119	187.134	0.805
149.63	4.7307	205.31	0.891
149.72	4.6972	203.856	0.824
149.92	4.3318	187.998	0.834
150.11	3.56	154.502	1.1
150.18	3.795	164.701	0.8
150.26	3.388	147.037	0.7
150.3	0.86	37.3235	0.1
150.42	4.2513	184.504	0.733
150.43	0.21	9.11388	-0.1
150.5	3.066	133.063	0.5
150.6	0.16	6.94391	-0.11
150.6	5.092	220.99	1.1
150.7	2.417	104.896	0.39
150.73	4.508	195.645	0.99
150.84	4.664	202.415	0.5
150.86	4.651	201.851	1.3
150.87	0.19	8.24589	-0.1
150.95	4.82	209.185	0.8
150.99	0.22	9.54787	-0.1
151.4	3.839	166.61	1.1
151.49	1.39	60.3252	0.18
151.5	2.486	107.891	0.4
151.68	2.459	106.719	0.5
151.71	4.6529	201.933	0.853
152.21	4.0651	176.423	0.643
152.37	0.099	4.29654	-0.1
152.41	4.809	208.708	0.89
153.69	1.53	66.4011	0.3
153.92	3.931	170.603	0.5
154.82	3.436	149.12	0.6
154.98	1.82	78.9869	0.3
154.99	4.299	186.574	0.91
155.06	4.648	201.72	0.9
155.08	3.204	139.052	1
155.27	1.36	59.0232	0.2
155.39	4.513	195.862	0.92
155.49	4.549	197.424	1.01
155.72	5.157	223.811	0.64
155.96	1.47	63.7971	1.2
156.18	3.303	143.348	1
156.58	4.775	207.232	0.89
156.67	3.379	146.647	1
156.86	3.648	158.321	0.74
156.87	3.291	142.827	0.9
156.96	1.6	69.4391	0.2
156.97	3.261	141.525	1
156.97	4.733	205.409	0.96
157.24	2.408	104.506	0.3
157.27	4.717	204.715	0.93
157.34	2.479	107.587	0.2
157.64	3.917	169.996	0.7
157.94	0.046	1.99637	-0.3
158.49	3.995	173.381	0.6
158.82	2.742	119.001	0.4
158.98	3.648	158.321	0.2
159.36	0.01	0.433994	-0.3
159.63	4.855	210.704	0.9
160.43	0.497	21.5695	0
160.81	0.467	20.2675	-0.1
162.04	4.743	205.843	0.84
162.3	3.183	138.14	0.7
163.92	0.393	17.056	0
163.92	0.623	27.0378	-0.1
164.92	4.531	196.643	0.93
165.02	0.828	35.9347	0.1
165.21	2.23	96.7807	0.5
165.27	4.733	205.409	1.1
165.28	1.86	80.7229	0.3
165.29	2.02	87.6668	0.2
167.81	4.943	214.523	0.83
167.95	4.08	177.07	1.01
168	3.372	146.343	0.76
168.14	0.22	9.54787	-0.2
168.43	0.973	42.2276	-0.74
168.99	2.783	120.781	0.45
169	3.225	139.963	0.79
169	3.241	140.658	0.82
169.59	2.06	89.4028	0.4
169.71	4.237	183.883	0.76
169.75	4.917	213.395	0.88
169.82	4.812	208.838	0.98
169.97	1.87	81.1569	0.22
169.99	3.16	137.142	1
169.99	3.337	144.824	0.71
170.98	2.617	113.576	0.96
171.42	3.243	140.744	0.7
171.56	0.23	9.98187	-0.1
171.98	3.372	146.343	0.69
174.24	0.285	12.3688	-0.05
174.55	2.804	121.692	0.7
174.55	3.958	171.775	0.6
174.66	1.88	81.5909	0.3
175.06	2.08	90.2708	0.4
175.18	0.03	1.30198	-0.3
177.99	0.643	27.9058	0
184.4	1.27	55.1173	0.2
186.2	5.189	225.2	1.2
188.47	1.76	76.383	0.4
188.86	1.16	50.3433	0.2
189.46	1.28	55.5513	0.2
189.52	0.02	0.867988	-0.3
190.38	3.39	147.124	0.6
192.42	6.109	265.127	0.58
192.84	3.227	140.05	0.76
193.25	5.035	218.516	0.9
193.48	5.364	232.794	0.67
193.52	4.202	182.364	0.7
193.59	4.913	213.221	1
193.64	4.773	207.145	0.93
193.72	4.582	198.856	0.86
193.83	3.165	137.359	0.6
193.84	3.264	141.656	0.69
194.09	3.809	165.308	0.8
194.18	0.777	33.7213	-0.79
194.27	2.09	90.7048	-0.55
194.36	4.014	174.205	-0.02
194.6	4.865	211.138	0.78
194.73	3.215	139.529	0.6
194.81	1.34	58.1552	0.11
194.82	1.87	81.1569	0.21
194.83	2.496	108.325	0.9
194.9	4.816	209.012	0.9
194.93	3.36	145.822	1
195.11	2.07	89.8368	0.4
195.49	3.668	159.189	0.5
195.65	4.835	209.836	0.94
195.82	3.126	135.667	1.01
196.03	4.671	202.719	0.9
196.1	2.839	123.211	0.57
196.1	4.3665	189.504	0.764
196.3	4.676	202.936	1
196.4	1.9	82.4589	0.37
196.57	3.39	147.124	0.8
197.29	2.09	90.7048	0.29
197.29	4.975	215.912	0.9
197.45	4.874	211.529	0.9
197.49	3.9256	170.369	0.707
197.53	4.954	215.001	0.87
197.61	3.296	143.044	0.9
197.69	0.624	27.0812	0.03
197.79	4.3826	190.202	0.663
197.82	4.887	212.093	0.9
197.89	1.53	66.4011	0.19
197.98	0.48	20.8317	0.01
197.99	4.1356	179.483	0.712
198.28	4.1078	178.276	0.679
198.48	0.234	10.1555	-0.1
198.57	3.314	143.826	0.4
198.71	4.195	182.061	0.8
198.87	3.093	134.234	0.7
198.88	0.418	18.141	-0.04
198.88	4.0775	176.961	0.729
198.88	4.3922	190.619	0.781
198.89	4.877	211.659	0.83
198.9	1.83	79.4209	0.3
198.95	0.097	4.20974	-0.1
198.98	4.596	199.464	0.846
199	3.572	155.023	1.1
199.18	0.597	25.9095	-0.1
199.18	4.404	191.131	0.823
199.21	0.053	2.30017	0
199.23	4.257	184.751	1
199.27	0.581	25.2151	0.05
199.28	4.6314	201	0.852
199.5	1.11	48.1734	0
199.5	3.404	147.732	1
199.6	1.82	78.9869	0.2
199.67	0.31	13.4538	-0.01
199.67	3.8882	168.746	0.697
199.77	2.631	114.184	0.5
199.78	0.812	35.2403	-0.07
199.87	4.7525	206.256	0.926
199.95	4.4223	191.925	0.825
199.96	1.36	59.0232	0.16
199.97	2.652	115.095	0.6
200.07	0.488	21.1789	0
200.19	5.228	226.892	1.3
200.2	4.671	202.719	0.883
200.37	0.574	24.9113	0.04
200.37	0.663	28.7738	0.05
200.49	0.06	2.60397	-0.3
200.77	4.7861	207.714	0.863
201.07	2.09	90.7048	0.5
201.18	4.485	194.646	0.97
201.56	4.1693	180.945	0.785
201.71	3.093	134.234	0.6
201.96	4.45	193.127	0.824
202.03	3.777	163.92	0.5
202.43	3.627	157.41	0.4
203.15	3.839	166.61	0.8
203.65	4.598	199.551	1.2
203.96	0.704	30.5532	0.1
204.34	4.492	194.95	0.88
204.54	3.675	159.493	0.76
204.57	3.323	144.216	1
204.96	2.13	92.4408	0.4
205.03	4.427	192.129	1.02
205.04	1.46	63.3631	0.2
205.04	4.377	189.959	0.94
205.04	4.754	206.321	0.94
205.16	3.381	146.733	1.1
205.24	4.6	199.637	1.03
205.24	4.66	202.241	0.99
205.43	4.023	174.596	0.83
205.46	3.282	142.437	1
205.53	1.76	76.383	0.2
205.53	4.595	199.42	1.01
205.55	2.344	101.728	0.3
205.56	3.248	140.961	0.8
205.56	3.264	141.656	0.9
205.63	4.69	203.543	1.08
206.33	4.416	191.652	0.72
206.48	4.908	213.004	0.8
206.53	1.42	61.6272	0.21
206.6	3.813	165.482	0.5
206.6	4.628	200.853	1.01
206.72	4.427	192.129	0.78
206.92	4.775	207.232	0.95
207.02	4.777	207.319	1.12
207.03	1.62	70.3071	0.4
207.11	2.482	107.717	0.2
207.22	2.12	92.0068	0.2
207.22	4.453	193.258	0.95
207.71	3.008	130.545	0.3
208.4	4.179	181.366	0.9
208.94	4.715	204.628	0.9
209.06	0.01	0.433994	-0.2
209.53	4.607	199.941	1.2
211.36	5.06	219.601	1.2
211.99	4.66	202.241	0.89
214.17	0.269	11.6744	0
215.48	1.58	68.5711	0.3
215.74	2.537	110.104	0.5
219.17	1.62	70.3071	0.3
219.48	4.589	199.16	0.86
219.66	2.12	92.0068	0.77
219.66	3.116	135.233	0.53
221.46	4.28	185.75	1.1
223.91	0.372	16.1446	-0.01
224.73	2.737	118.784	0.3
224.92	2.2	95.4787	0.5
225.23	2.07	89.8368	0.5
225.79	4.478	194.343	1
227.43	0.21	9.11388	-0.2
228	1.48	64.2311	0.3
228.71	1.96	85.0629	0.4
230.36	5.281	229.192	1.3
230.37	4.43	192.259	1
230.88	5.113	221.901	1.3
232.6	3.167	137.446	0.7
233.12	2.976	129.157	0.5
234.27	1.63	70.741	0.4
236.95	0.051	2.21337	-0.3
241.88	3.912	169.779	-0.02
242.44	4.296	186.444	0.55
242.5	0.934	40.5351	0.12
242.51	2.912	126.379	0.51
242.7	0.513	22.2639	-0.79
243.07	5.246	227.673	0.59
243.16	4.828	209.532	0.84
243.38	1.46	63.3631	0.2
243.48	0.941	40.8389	0.11
243.51	2.988	129.677	0.78
243.68	3.415	148.209	0.4
243.8	1.35	58.5892	-0.65
243.9	0.929	40.3181	0.2
244.1	4.957	215.131	0.8
244.29	4.828	209.532	0.8
244.35	4.517	196.035	0.8
244.48	1.99	86.3648	0.4
244.5	2.887	125.294	0.43
244.5	3.103	134.668	1.1
244.5	3.16	137.142	0.78
244.69	4.554	197.641	0.9
245.49	2.424	105.2	0.78
245.5	3.11	134.972	0.68
245.67	2.88	124.99	0.6
246.07	2.343	101.685	0.54
246.08	5.15	223.507	0.75
246.15	3.36	145.822	0.7
246.68	5.074	220.209	0.9
246.83	4.8134	208.899	0.976
246.85	1.72	74.647	0.22
246.96	0.817	35.4573	0.15
247.06	1.46	63.3631	0.27
247.21	0.484	21.0053	-0.06
247.34	3.107	134.842	0.7
247.52	4.4328	192.381	0.927
247.54	0.285	12.3688	-0.02
247.63	4.7617	206.655	0.936
247.64	4.756	206.408	0.8
247.74	0.431	18.7051	0.01
247.79	4.2	182.278	0.8
247.82	4.3615	189.287	0.871
248.03	4.0732	176.775	0.735
248.03	4.3488	188.735	0.811
248.12	4.8515	210.552	1.016
248.15	1.27	55.1173	0.16
248.18	2.955	128.245	0.6
248.22	4.6151	200.293	0.829
248.51	4.5825	198.878	0.89
248.52	4.6759	202.931	0.952
248.59	4.7195	204.824	0.969
248.62	4.0649	176.414	0.711
248.62	4.6093	200.041	0.905
248.65	0.49	21.2657	0.1
248.72	4.8533	210.63	1.019
248.84	0.555	24.0867	0.01
248.94	0.753	32.6798	-0.05
249.02	4.5086	195.671	0.889
249.23	0.02	0.867988	-0.2
249.26	2.953	128.158	0.5
249.3	4.6628	202.363	0.975
249.41	0.1	4.33994	-0.1
249.44	0.375	16.2748	-0.2
249.47	1.39	60.3252	0.4
249.55	4.605	199.854	0.9
249.7	4.7404	205.731	0.948
249.94	0.523	22.6979	0.01
250.1	0.03	1.30198	-0.2
250.44	3.024	131.24	0.7
250.67	4.947	214.697	1.2
250.82	3.471	150.639	0.2
250.93	0.083	3.60215	-0.2
252.05	2.608	113.186	0.6
252.39	4.0888	177.452	0.764
252.42	1.48	64.2311	0.2
253.84	3.335	144.737	0.9
254.1	3.609	156.628	0.4
254.25	4.427	192.129	1
254.28	4.662	202.328	0.97
254.47	4.759	206.538	1.05
254.49	2.07	89.8368	0.4
254.83	3.487	151.334	0.9
254.92	1.79	77.685	0.3
254.93	3.487	151.334	0.7
254.97	3.487	151.334	0.4
255.67	5.111	221.814	1
255.87	4.979	216.086	1.16
256.12	1.93	83.7609	0.4
256.3	1.54	66.8351	0.2
256.36	4.731	205.323	1.1
256.69	2.16	93.7427	0.5
256.76	5.039	218.69	0.97
257.76	2.376	103.117	0.1
258.21	2.852	123.775	0.7
258.54	4.754	206.321	0.9
258.91	1.56	67.7031	0.3
260.93	4.855	210.704	1.03
264.57	3.254	141.222	0.9
272.28	1.06	46.0034	0.1
272.84	0.02	0.867988	-0.2
275.15	5.088	220.816	1.3
275.89	2.21	95.9127	0.5
284.02	0.646	28.036	-0.1
288.65	4.099	177.894	0.91
291.47	2.542	110.321	-0.34
291.88	4.671	202.719	0.8
292.17	1.16	50.3433	0.15
292.17	2.829	122.777	0.58
292.18	2.972	128.983	0.79
292.2	0.467	20.2675	-0.77
292.4	3.257	141.352	-0.39
292.53	3.82	165.786	0.07
292.6	4.998	216.91	0.9
292.64	4.871	211.399	0.48
292.69	4.982	216.216	0.67
293.08	3.176	137.837	0.26
293.14	0.867	37.6273	0.09
293.15	1.21	52.5133	0.17
293.16	2.445	106.112	0.7
293.17	2.643	114.705	0.7
293.17	3.036	131.761	0.78
293.18	4.867	211.225	0.9
293.32	1.07	46.4374	-0.66
293.82	4.713	204.541	0.71
293.95	4.533	196.73	0.7
293.96	2.755	119.565	0.7
293.98	4.533	196.73	0.7
294.16	2.489	108.021	0.58
294.26	3.369	146.213	0.9
294.53	2.489	108.021	0.6
294.63	0.471	20.4411	0.02
294.73	1.48	64.2311	0.15
294.9	4.66	202.241	0.77
295.02	1.02	44.2674	0.16
295.8	1.11	48.1734	0.1
295.91	4.549	197.424	0.7
296.04	2.36	102.423	0.5
296.22	2.637	114.444	0.62
296.43	1.43	62.0612	0.31
296.58	3.885	168.607	0.9
296.64	3.275	142.133	1
296.76	4.582	198.856	0.7
296.81	1.49	64.6651	0.12
296.89	5.071	220.078	0.9
296.91	1.75	75.949	0.31
296.94	3.779	164.006	0.5
297.36	4.4634	193.709	0.905
297.39	1.49	64.6651	0.24
297.39	3.181	138.054	0.7
297.46	0.521	22.6111	-0.02
297.55	4.6419	201.456	0.84
297.59	0.053	2.30017	-0.2
297.6	4.918	213.438	1.074
297.85	4.7934	208.031	0.923
297.91	3.05	132.368	0.6
297.93	4.156	180.368	1
297.94	4.869	211.312	0.8
297.96	0.13	5.64192	-0.1
298.04	4.496	195.124	0.834
298.05	4.7702	207.024	1.039
298.2	0.783	33.9817	0.14
298.22	5.1852	225.035	1.126
298.23	5.0202	217.874	1.097
298.25	4.492	194.95	0.932
298.53	2.617	113.576	0.7
298.55	4.9063	212.931	0.765
298.59	0.402	17.4466	-0.18
298.6	0.803	34.8497	-0.04
298.6	2.346	101.815	0.5
298.61	2.928	127.073	0.7
298.72	3.482	151.117	0.2
298.74	4.5733	198.479	0.981
298.75	5.0197	217.852	1.103
298.75	5.054	219.341	1.135
298.76	0.22	9.54787	0
298.89	3.211	139.356	0.8
298.9	4.9839	216.298	1.118
298.98	0.379	16.4484	0
299.04	4.801	208.361	1.047
299.15	0.028	1.21518	-0.2
299.18	4.835	209.836	1
299.22	1.56	67.7031	0.4
299.32	3.218	139.659	0.8
299.44	4.1599	180.537	0.821
299.44	4.2217	183.219	0.832
299.59	5.039	218.69	1.2
299.64	4.9098	213.082	1.066
299.74	4.618	200.419	0.94
299.77	3.077	133.54	0.7
300.13	4.7711	207.063	1.05
300.27	0.083	3.60215	-0.3
300.27	0.464	20.1373	-0.05
300.49	0.039	1.69258	-0.3
300.59	2.2	95.4787	0.5
300.83	5.0376	218.629	1.139
301.07	3.234	140.354	0.7
301.42	5.058	219.514	0.8
301.78	3.121	135.45	0.1
301.98	3.11	134.972	0.1
302.47	1.6	69.4391	0.3
302.47	1.68	72.911	0.4
302.67	4.418	191.739	1.2
303.17	4.754	206.321	1.08
303.4	2.838	123.168	0.7
303.51	5.014	217.605	1.19
303.8	1.76	76.383	0.4
303.89	3.172	137.663	0.9
303.95	2.491	108.108	0.6
304.15	4.867	211.225	1
304.49	2.677	116.18	0.6
304.49	3.121	135.45	0.8
304.51	3.737	162.184	0.9
304.6	4.828	209.532	1.16
304.68	1.71	74.213	0.3
304.7	3.553	154.198	0.76
304.7	4.897	212.527	1.17
305.39	5.058	219.514	1.09
305.48	1.97	85.4969	0.4
305.49	3.795	164.701	0.82
305.56	5.099	221.294	1.19
305.69	4.835	209.836	1.14
305.69	4.846	210.314	1.17
305.89	5.051	219.21	1.16
305.89	5.067	219.905	1.17
305.98	5.037	218.603	1.21
306.05	1.91	82.8929	0.2
306.32	2.24	97.2147	0.1
306.47	5.15	223.507	1.26
306.68	4.782	207.536	1.13
306.88	5.18	224.809	1.24
306.92	1.77	76.817	0.2
307.18	5.127	222.509	1.04
307.31	2.01	87.2328	0
307.32	4.559	197.858	0.7
307.48	5.088	220.816	1.24
307.93	4.618	200.419	0.7
308.85	4.395	190.74	1.2
312.64	5.191	225.286	1.15
314.42	1.15	49.9093	0.2
317.69	0.02	0.867988	-0.2
319.46	1.25	54.2493	0.3
319.49	2.935	127.377	0.7
322.77	4.239	183.97	1.2
324.24	1.15	49.9093	0.2
328.62	2.09	90.7048	0.5
329.08	4.372	189.742	1
332.26	1.14	49.4753	0.2
335.27	2.08	90.2708	0.3
337.24	4.828	209.532	0.44
340.62	4.391	190.567	0.6
340.69	0.465	20.1807	-0.75
340.83	2.799	121.475	0.63
341.1	2.903	125.989	0.61
341.34	4.598	199.551	0.65
341.79	0.909	39.4501	0.09
341.82	2.23	96.7807	0.56
341.83	2.26	98.0827	0.58
341.84	0.761	33.027	-0.72
342.13	3.034	131.674	0.2
342.25	4.878	211.702	0.62
342.42	4.706	204.238	0.71
342.81	2.312	100.339	0.63
342.82	2.06	89.4028	0.52
342.98	2.482	107.717	0.6
343.8	1.48	64.2311	0.29
344.76	0.477	20.7015	0.02
345.36	2.851	123.732	0.68
345.56	2.638	114.488	0.6
345.68	2.29	99.3847	0.5
345.69	2.25	97.6487	0.5
345.97	2.921	126.77	0.2
346.15	1.58	68.5711	0.35
346.24	0.051	2.21337	-0.3
347.33	3.036	131.761	0.7
347.44	0.751	32.593	0.12
347.79	0.028	1.21518	-0.1
348	3.374	146.43	0.8
348.12	0.058	2.51717	0
348.18	3.038	131.847	0.8
348.24	0.656	28.47	0.08
348.38	0.01	0.433994	-0.2
348.54	0.435	18.8787	0
348.57	3.294	142.958	0.8
349.01	3.406	147.818	0.8
349.02	5.435	235.876	1.3
349.04	1.52	65.9671	0.22
349.58	0.21	9.11388	-0.1
349.61	0.243	10.5461	-0.03
350.25	2.965	128.679	0
350.53	1.58	68.5711	0.3
350.82	4.411	191.435	0.7
350.95	1.76	76.383	0.4
351.82	2.21	95.9127	0.5
353.82	0.759	32.9402	0.1
354.22	4.991	216.606	1.2
354.74	3.337	144.824	0.8
354.9	2.15	93.3087	0.5
354.9	5.145	223.29	1.2
355.11	5.239	227.37	1.25
355.44	4.936	214.22	1.2
355.46	5.331	231.362	1.1
355.6	5.35	232.187	1.13
356	5.168	224.288	1.08
356.78	2.387	103.594	0.2
356.81	4.411	191.435	0.7
357.44	1.94	84.1949	0.1
357.57	0.902	39.1463	0.1
358.46	0.34	14.7558	0
361.46	5.265	228.498	1.19
370.66	3.3	143.218	0.8
373.4	3.342	145.041	0.7
373.5	2.509	108.889	0.7
377.46	2.705	117.395	0.6
379.9	5.465	237.178	1.3
383.19	4.607	199.941	0.64
383.62	2.2	95.4787	0.5
383.76	2.726	118.307	0.5
387.52	3.112	135.059	0.1
387.73	1.19	51.6453	0.2
390.16	0.449	19.4863	-0.74
390.23	4.326	187.746	0.5
390.43	2.18	94.6107	-0.37
390.61	2.822	122.473	-0.14
390.75	4.54	197.033	0.35
390.9	4.54	197.033	0.7
391.01	4.789	207.84	0.64
391.44	1.24	53.8153	0.22
391.46	1.81	78.5529	0.42
391.46	1.84	79.8549	0.35
391.51	1.59	69.0051	-0.5
391.81	4.333	188.05	0.43
392.32	0.522	22.6545	-0.73
392.41	1	43.3994	0.18
392.44	1.29	55.9852	0.25
392.45	2.392	103.811	0.62
392.66	4.683	203.239	0.8
392.66	5.196	225.503	1.1
392.87	2.776	120.477	0.1
393.16	4.522	196.252	0.57
393.34	2.523	109.497	0.6
393.44	1.98	85.9308	0.54
393.44	3.386	146.95	0.8
393.45	2.12	92.0068	0.54
393.45	2.24	97.2147	0.54
393.51	2.401	104.202	0.6
393.74	1.71	74.213	0.4
393.81	4.653	201.937	0.8
393.9	0.569	24.6943	0.08
393.95	5.124	222.379	1.3
394.2	1.31	56.8532	0.1
394.73	2.307	100.122	0.6
394.8	2.763	119.913	0.49
394.89	5.2081	226.029	1.144
394.96	3.356	145.648	0.7
395.19	2.814	122.126	0.58
395.29	2.438	105.808	0.2
395.44	2.854	123.862	0
395.72	2.23	96.7807	0.5
395.75	4.368	189.569	0.6
395.78	5.1567	223.798	1.008
395.79	2.634	114.314	0.7
395.94	5.5627	241.418	1.089
396.4	0.046	1.99637	-0.2
396.62	0.023	0.998187	-0.1
396.67	4.8278	209.524	0.227
396.8	5.2639	228.45	1.184
396.81	0.406	17.6202	-0.07
396.83	3.99	173.164	1
396.88	1.86	80.7229	0.25
396.9	5.2393	227.383	1.171
397.05	3.243	140.744	0.8
397.25	4.368	189.569	0.6
397.27	5.1505	223.529	1.158
397.28	2.965	128.679	0.6
397.3	1.46	63.3631	-0.12
397.35	5.3587	232.564	1.242
397.43	3.855	167.305	0.9
397.44	1.34	58.1552	0.14
397.48	0.028	1.21518	-0.1
397.52	2.571	111.58	0.6
397.57	5.344	231.926	1.233
397.62	5.29	229.583	1.3
397.72	2.335	101.338	0.4
397.77	5.3766	233.341	1.203
397.85	0.383	16.622	-0.02
397.87	1.09	47.3054	-0.01
397.87	2.47	107.197	0.6
397.97	0.567	24.6075	0.08
398.07	4.5618	197.979	0.982
398.07	5.247	227.717	1.207
398.07	5.3855	233.728	1.203
398.16	4.9802	216.138	1.058
398.26	5.1069	221.636	1.128
398.26	5.1429	223.199	1.176
398.31	2.608	113.186	-0.2
398.36	0.407	17.6636	0
398.36	4.9733	215.838	1.009
398.36	5.1934	225.391	1.184
398.43	3.938	170.907	0.4
398.55	0.23	9.98187	-0.09
398.96	4.9157	213.339	1.024
399.06	1.34	58.1552	0.21
399.19	5.297	229.887	1.3
399.64	0.438	19.0089	-0.05
399.74	5.0463	219.006	1.119
399.79	4.567	198.205	1.01
399.86	2.28	98.9507	0.6
400.04	5.023	217.995	0.8
400.75	1.86	80.7229	0.5
401.98	2.24	97.2147	0.6
402.63	4.264	185.055	1.01
402.73	5.308	230.364	1.13
402.78	2.604	113.012	0.6
402.87	5.327	231.189	1.3
402.93	5.237	227.283	1.23
402.94	4.377	189.959	0.5
403.03	4.398	190.871	1.1
403.03	5.318	230.798	1.26
403.12	5.17	224.375	1.04
403.66	0.863	37.4537	0.2
403.67	2.569	111.493	0.6
403.75	2.1	91.1388	0.4
403.91	4.635	201.156	1
404.11	5.366	232.881	1.3
404.21	5.228	226.892	1.21
404.41	5.138	222.986	1.12
404.71	4.533	196.73	1.05
404.81	5.29	229.583	0.98
404.91	5.308	230.364	1.24
405.21	5.272	228.802	1.17
405.21	5.279	229.106	1.09
405.58	5.384	233.662	1.31
405.67	1.94	84.1949	0.2
405.79	5.122	222.292	1.2
406	5.198	225.59	1.27
406.06	5.295	229.8	1.11
406.17	4.248	184.361	0.7
406.18	1.67	72.477	0.2
406.2	5.327	231.189	1.27
406.71	2.381	103.334	0.3
406.77	1.5	65.0991	0.1
406.89	5.46	236.961	1.15
408.92	4.306	186.878	1.2
414.47	2.06	89.4028	0.4
423.04	4.244	184.187	1.2
428.19	1.7	73.779	0.4
434.31	2.788	120.998	0.5
440.09	2.624	113.88	0.68
441.08	2.42	105.027	0.61
441.08	2.486	107.891	0.6
441.09	1.6	69.4391	0.4
442.07	1.08	46.8714	0.19
444.21	0.459	19.9203	0.04
445.85	0.069	2.99456	-0.1
445.95	0.283	12.282	0
446.24	1.31	56.8532	0.2
446.39	0.02	0.867988	-0.2
446.39	4.777	207.319	1.1
446.67	0.734	31.8552	0.1
446.73	0.025	1.08499	-0.1
447.18	0.529	22.9583	0
447.19	0.723	31.3778	0.08
447.28	0.099	4.29654	-0.1
447.62	0.444	19.2693	-0.2
447.88	0.571	24.7811	0.06
453.81	5.269	228.672	1.3
454.1	5.26	228.281	1.25
454.24	2.01	87.2328	0.4
454.49	5.276	228.975	1.21
454.58	2.27	98.5167	0.5
454.62	1.84	79.8549	0
454.71	5.465	237.178	1.3
454.77	5.428	235.572	1.3
454.8	5.272	228.802	1.31
455.43	4.927	213.829	1.2
455.67	1.76	76.383	0.4
455.89	5.38	233.489	1.26
461.93	3.027	131.37	0.7
467.15	5.377	233.359	1.3
467.73	4.822	209.272	1.17
467.76	2.624	113.88	-0.1
469.86	0.11	4.77394	-0.1
472.74	2.09	90.7048	0.4
477.92	5.511	239.174	1.3
478.08	2.29	99.3847	0.4
479.07	3.153	136.838	0.6
482.83	5.341	231.796	1.1
483.6	5.267	228.585	1.3
487.91	4.292	186.27	0.31
488.38	4.278	185.663	0.6
489.07	0.393	17.056	-0.72
489.41	1.48	64.2311	-0.5
491.26	4.319	187.442	0.44
491.27	4.257	184.751	0.6
492.19	3.158	137.055	0.8
492.34	2.25	97.6487	0.4
492.38	2.399	104.115	0.5
492.63	1.21	52.5133	0.2
492.78	1.04	45.1354	0.2
493.12	0.482	20.9185	0.06
493.33	1.57	68.1371	0.34
493.62	0.037	1.60578	-0.1
494	4.209	182.668	0.5
494.09	2.15	93.3087	0.5
494.21	1.09	47.3054	0.17
494.7	4.418	191.739	0.6
494.72	2.375	103.074	0.57
494.79	1.49	64.6651	0
494.79	3.066	133.063	0.7
494.92	2.09	90.7048	0.4
494.99	1.26	54.6833	0.2
495.36	3.257	141.352	0.9
495.4	5.4282	235.581	1.237
495.48	0.551	23.9131	0.05
495.54	0.02	0.867988	-0.1
495.54	0.11	4.77394	-0.1
495.61	1.73	75.081	0.22
495.67	3.682	159.797	0.9
495.72	0.434	18.8353	-0.03
495.75	0.032	1.38878	-0.2
495.75	2.13	92.4408	0.4
495.75	5.1631	224.076	1.191
495.95	4.9187	213.469	1.063
495.95	5.3213	230.941	1.191
496.03	2.364	102.596	0
496.09	1.65	71.609	0.34
496.12	3.984	172.903	0.5
496.14	3.422	148.513	0.8
496.15	5.3254	231.119	1.231
496.62	0.389	16.8824	-0.1
496.64	4.457	193.431	0.8
496.64	5.5021	238.788	1.288
496.73	5.268	228.628	1.191
496.74	5.357	232.491	1.238
496.75	2.604	113.012	0.6
496.8	2.04	88.5348	0.4
496.8	5.3977	234.257	1.246
496.82	5.268	228.628	1.204
496.88	0.034	1.47558	-0.1
496.94	2.631	114.184	0.6
496.94	5.32	230.885	1.202
497.04	5.098	221.25	1.081
497.04	5.318	230.798	1.177
497.12	1.69	73.345	0.36
497.13	0.713	30.9438	0
497.18	3.052	132.455	0.7
497.18	4.6722	202.771	1.065
497.19	0.453	19.6599	0
497.24	5.1604	223.958	1.175
497.28	0.351	15.2332	-0.03
497.34	5.2297	226.966	1.086
497.44	5.271	228.758	1.245
497.49	0.886	38.4519	0.11
497.55	1.92	83.3269	0.4
497.93	5.1696	224.358	1.201
498.08	0.45	19.5297	0.02
498.22	5.18	224.809	1.181
498.33	5.3562	232.456	1.091
498.33	5.4087	234.734	1.267
498.88	1.09	47.3054	0.1
499.07	2.25	97.6487	-0.1
499.18	1.62	70.3071	0.3
499.92	5.301	230.06	1.08
500.05	2.24	97.2147	-0.2
500.47	2.711	117.656	0.57
500.57	5.316	230.711	0.92
501.01	3.756	163.008	1
501.72	0.989	42.922	0.16
502.11	3.034	131.674	0.6
502.3	5.384	233.662	1.3
502.51	2.558	111.016	0.5
502.56	4.497	195.167	1.2
502.59	5.428	235.572	1.28
502.63	5.161	223.984	1.11
503.18	5.325	231.102	1.28
503.19	4.572	198.422	1.12
503.58	5.267	228.585	1.2
503.65	1.52	65.9671	0.3
503.87	4.041	175.377	0.5
503.98	5.331	231.362	1.23
504.04	1.97	85.4969	0.5
504.07	1.93	83.7609	0.2
504.35	5.449	236.483	1.3
504.38	5.343	231.883	1.2
504.48	4.867	211.225	1.19
504.57	4.152	180.194	0.4
504.67	5.311	230.494	1.28
504.76	5.267	228.585	1.26
504.77	5.331	231.362	1.03
504.79	1.74	75.515	0
505.17	5.313	230.581	1.12
505.84	4.963	215.391	1.19
505.86	5.38	233.489	1.07
506.16	5.488	238.176	1.17
506.49	1.64	71.175	0.2
507.35	4.977	215.999	1.13
507.96	4.462	193.648	1.2
509.59	4.395	190.74	1.2
510.62	5.331	231.362	1.09
513.61	1.07	46.4374	0.1
517.45	2.16	93.7427	0.3
522.15	0.936	40.6219	0.1
522.51	0.851	36.9329	0.1
527.31	1.25	54.2493	0.2
533.99	0.471	20.4411	-0.01
541.51	0.328	14.235	-0.09
545.86	1.42	61.6272	0
545.97	0.76	32.9836	0.08
546.09	0.487	21.1355	0.05
546.88	0.535	23.2187	0.07
547.03	0.028	1.21518	-0.2
548.01	5.453	236.657	1.3
550.72	2.571	111.58	0.6
552.3	2.739	118.871	0.6
552.76	2.12	92.0068	0.4
553.34	1.81	78.5529	0.3
553.89	1.29	55.9852	0.3
553.98	1.64	71.175	0.3
553.99	5.439	236.049	1.3
554.94	5.214	226.285	1.3
555.31	5.485	238.046	1.3
555.41	0.451	19.5731	-0.1
555.76	1.72	74.647	0.1
556.78	4.754	206.321	1.2
562.02	1.47	63.7971	0.4
572.01	0.566	24.5641	0.1
578.67	4.618	200.419	1.19
580.16	3.172	137.663	0.6
583.11	5.301	230.06	1.3
583.48	1.49	64.6651	0.24
584.34	4.064	176.375	0.36
585.92	1.55	67.2691	0.3
586.55	0.52	22.5677	-0.1
586.88	0.918	39.8407	0.04
586.94	0.38	16.4918	-0.68
587.03	4.915	213.308	0.9
587.91	2.1	91.1388	0.45
588.06	4.223	183.276	0.35
588.33	1.14	49.4753	-0.54
588.6	1.39	60.3252	-0.43
588.72	1.16	50.3433	-0.04
588.88	2.523	109.497	0.61
588.9	2.08	90.2708	0.42
589.19	0.619	26.8642	-0.65
589.2	3.91	169.692	0.24
589.46	0.945	41.0124	-0.57
589.53	2.06	89.4028	-0.14
589.8	2.571	111.58	-0.18
589.89	2.24	97.2147	0.49
590.36	3.618	157.019	0.23
590.41	1.37	59.4572	-0.2
590.49	4.034	175.073	0.5
590.82	1.09	47.3054	0.13
590.84	4.101	177.981	0.3
590.87	1.22	52.9473	0.2
590.88	2.606	113.099	0.58
590.91	1.44	62.4952	0.2
591.15	1.59	69.0051	-0.3
591.44	2.1	91.1388	-0.12
592.3	3.547	153.938	0.1
592.47	3.236	140.441	0.7
593	1.94	84.1949	0.4
593.04	0.529	22.9583	0
593.26	4.154	180.281	0.5
593.55	3.1	134.538	0.6
593.6	2	86.7988	0.4
593.63	1.68	72.911	0.1
593.77	5.1003	221.35	1.183
593.99	5.2357	227.226	1.21
594.09	5.325	231.102	1.235
594.1	5.2921	229.674	1.231
594.16	0.691	29.989	0.01
594.31	3.024	131.24	0.7
594.34	1.89	82.0249	0.3
594.55	2.783	120.781	0.6
594.74	5.196	225.503	1.2
594.78	0.069	2.99456	-0.1
594.78	5.3557	232.434	1.245
594.88	5.1682	224.297	1.192
594.94	0.041	1.77938	0
594.94	1.17	50.7773	0.1
594.94	2.17	94.1767	0.4
594.99	1.75	75.949	0.3
595	5.3761	233.32	1.257
595.03	1.47	63.7971	0
595.17	5.2242	226.727	1.225
595.27	5.2706	228.741	1.179
595.31	1.5	65.0991	0.25
595.35	0.032	1.38878	-0.1
595.37	4.294	186.357	0.5
595.44	1.56	67.7031	0.4
595.44	2.999	130.155	0.7
595.54	4.2166	182.998	0.933
595.57	0.592	25.6925	0.1
595.57	0.598	25.9529	0
595.57	4.462	193.648	1.015
595.57	5.2958	229.835	1.228
595.67	5.3268	231.18	1.221
595.78	2.314	100.426	0.4
595.97	5.2063	225.95	1.229
596.07	4.4842	194.612	0.993
596.08	0.621	26.951	-0.1
596.15	5.1994	225.651	1.216
596.2	3.7087	160.955	0.695
596.33	1.96	85.0629	0.3
596.55	0.461	20.0071	0.02
596.56	5.0876	220.799	1.181
596.66	5.0858	220.721	1.149
596.82	3.169	137.533	0.6
597.07	1.58	68.5711	0.3
597.16	5.163	224.071	1.08
597.32	2.627	114.01	0.5
597.49	3.903	169.388	0.9
597.55	2.647	114.878	0.5
597.55	4.547	197.337	0.887
597.85	5.041	218.776	1.171
597.95	5.23	226.979	1.26
598.06	1.5	65.0991	0.2
598.21	0.803	34.8497	0.15
598.96	1.87	81.1569	-0.4
599.14	0.803	34.8497	0.1
599.33	5.272	228.802	1.48
600.54	2.21	95.9127	0.44
601	3.061	132.846	0.7
601.25	4.621	200.549	1.2
601.6	5.249	227.804	1.31
601.63	4.74	205.713	1.2
601.79	2.76	119.782	0.5
601.82	5.308	230.364	1.06
601.91	5.032	218.386	1.08
602.07	3.901	169.301	0.4
602.13	3.685	159.927	0.77
602.41	3.997	173.467	0.87
602.74	1.58	68.5711	-0.4
603.02	3.818	165.699	0.3
603.2	4.795	208.1	1.19
603.64	5.439	236.049	1.3
603.78	1.81	78.5529	0.3
603.8	5.074	220.209	1.14
603.9	5.23	226.979	1.16
604	5.223	226.675	1.27
604.07	3.399	147.515	0.1
604.23	3.74	162.314	0.8
604.28	5.2	225.677	1.26
604.6	1.7	73.779	0.2
604.69	4.828	209.532	1.16
604.89	5.092	220.99	1.2
605.07	3.323	144.216	0.7
605.18	5.138	222.986	1.3
605.54	1.81	78.5529	0.1
605.85	1.61	69.8731	0.1
605.88	3.986	172.99	0.88
606.24	3.816	165.612	0.89
607.14	4.749	206.104	1.3
610.93	4.66	202.241	0.91
618.59	2.367	102.726	0.4
619.84	1.09	47.3054	0.1
623.73	0.636	27.602	-0.04
625.25	2.302	99.9055	0.5
626.75	1.88	81.5909	0.3
628.36	1.14	49.4753	0.2
633.4	3.632	157.627	0.8
640.66	0.544	23.6093	-0.01
641.97	0.452	19.6165	0.01
643.03	1.04	45.1354	0
643.4	0.039	1.69258	-0.3
644.16	0.09	3.90595	0
644.88	0.467	20.2675	0
645.24	0.274	11.8914	-0.1
645.33	0.099	4.29654	-0.1
645.41	0.851	36.9329	0.05
645.74	0.028	1.21518	-0.1
646.23	0.413	17.924	0.01
652.26	4.858	210.834	1.1
653.38	1.89	82.0249	0.3
653.44	1.35	58.5892	0.2
653.59	1.63	70.741	0.2
653.84	1.13	49.0413	0.2
654.41	0.632	27.4284	0
654.46	5.384	233.662	1.3
654.53	4.832	209.706	1.1
665.2	0.046	1.99637	-0.2
673.34	0.529	22.9583	0
678.85	2.15	93.3087	0.3
680.41	3.103	134.668	0.04
683.17	4.83	209.619	1.2
683.37	3.395	147.341	0.7
683.61	2.25	97.6487	0.3
684.3	1.5	65.0991	0.2
686.06	2.02	87.6668	0.34
686.23	0.904	39.2331	-0.58
686.54	1.28	55.5513	-0.28
686.74	0.389	16.8824	-0.7
687.42	3.846	166.914	0.3
687.62	1.22	52.9473	-0.33
687.83	1.1	47.7394	0
687.97	0.927	40.2313	0.05
688.05	0.474	20.5713	-0.67
688.12	1.23	53.3813	-0.1
688.23	3.151	136.752	0.01
688.77	1.72	74.647	-0.37
688.91	0.592	25.6925	0.07
689.02	1.9	82.4589	0.4
689.03	1.85	80.2889	0.3
689.72	2.928	127.073	0.6
690.01	1.44	62.4952	0.2
690.02	2.629	114.097	0.5
690.05	3.583	155.5	0.1
690.22	1.2	52.0793	-0.5
690.71	2.03	88.1008	0.3
691.21	0.643	27.9058	-0.05
691.33	0.615	26.6906	-0.01
691.56	4.106	178.198	0.3
691.63	1.51	65.5331	0.1
691.64	2.491	108.108	-0.1
692.57	3.754	162.921	0.7
692.83	3.1824	138.114	0.634
693.1	2.381	103.334	0.4
693.22	1.84	79.8549	0.34
693.36	4.057	176.071	0.5
693.41	0.466	20.2241	0.03
693.66	1.44	62.4952	0.2
693.8	4.9288	213.907	1.198
693.86	3.0888	134.052	0.607
693.88	0.95	41.2294	0.1
693.9	1.44	62.4952	0.18
694.04	4.8386	209.992	1.176
694.06	3.1526	136.821	0.631
694.16	4.4326	192.372	1.049
694.16	4.5799	198.765	1.116
694.16	4.862	211.008	1.136
694.22	1.62	70.3071	0.2
694.25	2.9467	127.885	0.55
694.25	4.918	213.438	1.175
694.35	4.8361	209.884	1.198
694.47	1.38	59.8912	0.1
694.54	0.067	2.90776	-0.1
694.57	1.63	70.741	0.2
694.65	4.98	216.129	1.171
694.68	2.707	117.482	0.5
694.75	4.4803	194.442	1.078
694.75	5.1478	223.412	1.147
694.77	0.099	4.29654	-0.2
694.81	4.062	176.288	0.98
694.87	0.803	34.8497	0.01
694.88	0.581	25.2151	0.08
694.93	4.9284	213.89	1.169
694.94	1.41	61.1932	0.19
694.95	5.1124	221.875	1.204
694.98	1.22	52.9473	0.3
694.98	1.46	63.3631	0.1
694.99	0.469	20.3543	-0.1
695	0.764	33.1572	0.1
695.05	4.808	208.664	1.118
695.15	4.3158	187.303	1.022
695.15	4.8889	212.175	1.183
695.2	0.614	26.6472	-0.1
695.4	4.5281	196.517	1.088
695.56	0.666	28.904	0.01
695.77	2.394	103.898	0.4
696	1.73	75.081	0.2
696.24	4.628	200.853	1.11
696.25	2.806	121.779	0.6
696.26	1.48	64.2311	0.2
696.3	1.67	72.477	0.2
696.7	3.245	140.831	0.7
696.71	2.921	126.77	0.6
696.98	0.498	21.6129	-0.21
697.07	2.341	101.598	0.4
697.48	0.574	24.9113	0.08
698.42	1.53	66.4011	-0.4
699.1	4.86	210.921	1.21
699.46	3.484	151.204	0.2
699.76	2.23	96.7807	-0.2
700.43	2.3	99.8187	0.5
700.56	2	86.7988	0.29
700.6	1.72	74.647	0.2
700.81	3.411	148.035	0.8
701.03	2.23	96.7807	0.4
701.39	4.517	196.035	0.91
701.67	5.007	217.301	1.25
701.78	4.908	213.004	1.19
701.84	1.96	85.0629	0.2
701.88	3.859	167.478	0.82
701.88	4.71	204.411	1.03
702.38	4.161	180.585	0.92
702.57	4.478	194.343	1.11
702.57	4.664	202.415	1.1
703.45	5.009	217.388	1.12
703.47	4.168	180.889	0.95
703.56	1.71	74.213	0.1
703.68	5.127	222.509	1.2
703.89	2.999	130.155	0.46
703.96	4.299	186.574	0.98
703.99	1.67	72.477	0.2
704.06	4.554	197.641	1.01
704.42	1.58	68.5711	0.2
704.65	3.174	137.75	0.59
705.05	4.05	175.768	0.92
705.17	1.6	69.4391	0.1
705.98	4.844	210.227	1.2
706.01	2.758	119.696	0.47
708.83	1.15	49.9093	-0.5
709.01	3.549	154.025	0.75
718.96	1.04	45.1354	0.1
719.7	0.034	1.47558	-0.2
727.49	1.04	45.1354	0.1
728.98	2.18	94.6107	0.3
732.99	4.46	193.561	1
734.84	0.75	32.5496	0
737.94	0.715	31.0306	0
740.29	0.471	20.4411	-0.03
740.45	0.799	34.6761	-0.02
740.75	0.964	41.837	-0.02
741.37	0.537	23.3055	0
743.36	0.542	23.5225	-0.05
743.61	0.12	5.20793	-0.1
744.65	0.051	2.21337	-0.1
744.79	0.462	20.0505	0
745.54	4.4	190.957	1
750	4.055	175.985	0.9
752.35	1.24	53.8153	0.2
752.69	1.59	69.0051	0.1
753.05	1.02	44.2674	0.1
753.68	4.115	178.589	0.9
754.59	1.75	75.949	0.1
754.76	4.97	215.695	1.1
772.37	1.04	45.1354	0.1
773.73	0.849	36.8461	0
773.96	4.862	211.008	1.2
777.93	1.92	83.3269	0.1
778.12	1.14	49.4753	0.1
781.81	1.49	64.6651	0.13
782.06	2.473	107.327	-0.15
782.1	4.264	185.055	1
783.37	1.96	85.0629	-0.22
783.54	0.384	16.6654	-0.7
784.85	1.53	66.4011	-0.35
785.06	0.835	36.2385	-0.58
785.7	1.21	52.5133	-0.45
786.14	2.06	89.4028	0.3
786.22	1.96	85.0629	-0.23
786.41	0.996	43.2258	-0.49
786.86	0.545	23.6527	-0.63
786.89	1.2	52.0793	0.01
787.09	1.22	52.9473	0.01
787.12	2.16	93.7427	0.39
787.13	2.376	103.117	0.41
787.14	2.12	92.0068	0.34
787.26	2.657	115.312	0.3
787.54	2.693	116.875	-0.1
787.55	1.06	46.0034	-0.27
787.64	1.12	48.6073	-0.28
788.11	1.64	71.175	0.2
788.13	2.17	94.1767	0.36
788.28	1.46	63.3631	0.14
788.66	1.41	61.1932	-0.1
788.74	1.2	52.0793	-0.5
788.94	1.58	68.5711	0.1
789.04	1.16	50.3433	0.02
789.42	1.46	63.3631	-0.33
789.71	2.23	96.7807	0.3
790.25	1.66	72.043	-0.3
790.51	0.686	29.772	-0.07
790.92	1.66	72.043	0.1
790.94	3.142	136.361	0
791.09	0.773	33.5477	-0.02
791.21	1.63	70.741	0.1
791.29	4.753	206.277	0.71
791.75	0.521	22.6111	-0.01
791.99	2.431	105.504	0.4
792.2	0.585	25.3887	0.01
792.39	4.3649	189.434	0.916
792.49	3.358	145.735	0.2
792.51	2.18	94.6107	0.3
792.81	0.15	6.50991	-0.1
792.89	0.542	23.5225	0.05
792.9	1.73	75.081	0.24
792.97	2.638	114.488	0.4
792.99	4.3578	189.126	0.981
793.18	1.34	58.1552	0.1
793.19	4.4069	191.257	1.04
793.27	1.44	62.4952	0.2
793.48	3.3144	143.843	0.697
793.53	1.79	77.685	0.1
793.58	4.1283	179.166	0.957
793.74	1.51	65.5331	0.1
793.76	0.961	41.7068	-0.1
793.78	0.925	40.1445	0.1
793.78	1.18	51.2113	0
793.87	4.427	192.129	1
793.89	1.61	69.8731	0.1
793.9	4.2664	185.159	1.012
793.92	1.55	67.2691	-0.4
793.98	2.3902	103.733	0.381
793.98	3.9272	170.438	0.862
794.02	0.09	3.90595	-0.1
794.18	4.3548	188.996	1.031
794.22	2.11	91.5728	0.2
794.47	2.3642	102.605	0.369
794.47	4.2802	185.758	1.017
794.5	3.6295	157.518	0.762
794.69	1.67	72.477	0.2
794.71	0.051	2.21337	-0.2
794.74	0.519	22.5243	0.05
794.76	1.3	56.4192	-0.5
794.77	0.559	24.2603	-0.1
794.77	3.2483	140.974	0.735
794.86	2.12	92.0068	0.2
794.94	1.52	65.9671	0.1
795.07	4.1294	179.214	0.98
795.08	2.3321	101.212	0.3
795.24	0.829	35.9781	-0.09
795.36	3.7475	162.639	0.776
795.37	2.5249	109.579	0.361
795.52	2.489	108.021	0.4
795.53	0.895	38.8425	-0.03
795.67	2.44	105.895	0.5
795.95	2.13	92.4408	0.3
795.97	2.447	106.198	0.4
796.14	4.4578	193.466	1.07
796.35	3.783	164.18	0.77
797.04	4.145	179.891	0.95
797.25	3.3431	145.089	0.725
797.27	4.72	204.845	1.2
798.59	3.001	130.242	0
799.13	1.58	68.5711	0
799.62	2.18	94.6107	0.4
799.69	1.9	82.4589	0.2
800.4	4.575	198.552	1.09
800.71	2.22	96.3467	0.4
800.86	2.684	116.484	-0.2
801.01	4.138	179.587	0.82
801.31	3.397	147.428	0.63
801.8	3.898	169.171	0.82
801.97	1.99	86.3648	0.2
801.99	2.01	87.2328	0.1
802.24	1.72	74.647	0
802.3	3.726	161.706	0.74
802.49	2.3	99.8187	0.31
802.59	3.586	155.63	0.74
802.59	4.161	180.585	0.95
802.76	1.66	72.043	0.1
802.79	4.034	175.073	0.85
803.28	4.657	202.111	1.1
803.38	3.806	165.178	0.52
803.56	2.19	95.0447	0.3
803.76	4.492	194.95	1.08
803.78	2.452	106.415	0.28
804.18	3.517	152.636	0.65
804.28	3.379	146.647	0.6
804.59	2.29	99.3847	0.28
804.67	2.93	127.16	0.46
805.72	2.3	99.8187	0.28
806.35	4.733	205.409	1.3
808.53	2.668	115.79	0.23
816.26	2.36	102.423	0.4
819.53	1.03	44.7014	0.1
820.2	1.08	46.8714	-0.5
826.07	1.06	46.0034	0.1
828.5	2.01	87.2328	0.2
840.1	1.04	45.1354	0
840.5	0.932	40.4483	-0.04
840.53	0.604	26.2132	0
840.93	0.647	28.0794	-0.08
842.59	0.22	9.54787	-0.1
843.31	0.588	25.5189	-0.05
843.37	0.13	5.64192	-0.2
843.51	0.557	24.1735	0
844.36	4.145	179.891	0.92
844.7	0.074	3.21156	-0.1
844.83	3.774	163.789	0.7
847.4	3.691	160.187	0.7
852.93	1.66	72.043	0.1
853.6	1.04	45.1354	0.1
853.77	3.298	143.131	0.6
853.83	1.89	82.0249	0
854.12	4.533	196.73	1.1
864.5	2.28	98.9507	0.3
868.18	4.697	203.847	1.2
872.31	1.01	43.8334	0
872.52	1.05	45.5694	0
877.37	1.29	55.9852	-0.37
879.35	2.404	104.332	0.4
882.17	3.795	164.701	0.8
882.26	0.405	17.5768	-0.69
882.4	2.23	96.7807	0
882.56	1.12	48.6073	-0.22
883.66	1.29	55.9852	-0.2
884.63	0.586	25.4321	-0.66
884.84	0.794	34.4591	-0.58
885.19	2.25	97.6487	0.29
885.91	1.19	51.6453	-0.03
886.14	1.26	54.6833	-0.37
886.71	1.06	46.0034	-0.4
887.69	1.09	47.3054	-0.49
887.97	0.08	3.47195	-0.2
888.61	1.26	54.6833	-0.4
888.81	0.544	23.6093	0
888.9	1.17	50.7773	-0.5
889.15	2.03	88.1008	0.2
889.37	0.994	43.139	-0.53
889.66	1.76	76.383	0.1
889.74	1.6	69.4391	-0.1
889.96	1.64	71.175	0.2
890.3	0.856	37.1499	-0.08
890.32	1.62	70.3071	-0.3
890.54	2.18	94.6107	-0.3
890.74	1.75	75.949	0.1
891	2.69	116.744	0.443
891.01	0.955	41.4464	0
891.15	1.76	76.383	0
891.38	2.196	95.3051	0.289
891.57	3.412	148.079	0.718
891.8	2.9598	128.454	0.555
891.83	2.53	109.801	0.3
891.87	2.245	97.4317	0.139
891.93	0.663	28.7738	-0.04
892.07	2.22	96.3467	0.246
892.11	0.915	39.7105	0
892.17	3.9694	172.27	0.8
892.19	0.064	2.77756	-0.2
892.52	2.29	99.3847	0.149
892.56	2.546	110.495	-0.1
892.63	1.74	75.515	0.17
[truncated: 1,667 more rows]

## Sheet: North Atlantic
Water depth (m)	O2 ml/l	O2 umol/kg	d13C of DIC
0	4.556	197.728	1.85
0.5	5.405	234.574	1.82
0.79	5.775	250.632	1.8
0.99	4.526	196.426	1.8
0.99	4.54	197.033	1.87
1.09	5.238	227.326	1.8
1.09	6.298	273.33	1.64
1.58	6.84	296.852	1.55
1.59	6.222	270.031	1.83
1.68	6.47	280.794	1.36
1.78	5.963	258.791	1.8
1.79	4.744	205.887	1.53
1.88	5.864	254.494	1.86
1.88	5.894	255.796	1.8
1.98	5.279	229.106	1.78
1.99	4.448	193.041	1.4
2.08	6.16	267.34	1.31
2.08	6.185	268.425	1.3
2.18	6.61	286.87	1.45
2.19	5.322	230.972	1.04
2.28	5.258	228.194	1.71
2.28	6.683	290.038	1.62
2.29	4.427	192.129	1.6
2.38	4.829	209.576	1.37
2.38	6.608	286.783	1.48
2.39	4.82	209.185	1.64
2.48	4.521	196.209	1.5
2.48	4.627	200.809	1.3
2.48	5.318	230.798	1.32
2.48	5.997	260.266	1.34
2.49	4.432	192.346	1.6
2.67	6.188	268.556	1.54
2.88	4.43	192.259	1.4
2.88	4.971	215.739	1.24
2.88	5.589	242.559	1.5
2.98	5.368	232.968	1.81
2.98	5.593	242.733	1.5
2.98	5.697	247.246	1.46
3.07	5.896	255.883	1.41
3.08	4.799	208.274	1.65
3.08	5.277	229.019	1.4
3.17	5.981	259.572	1.58
3.18	4.469	193.952	1.4
3.18	4.813	208.881	1.35
3.18	4.84	210.053	1.47
3.18	4.893	212.353	1.28
3.18	4.935	214.176	1.27
3.18	4.946	214.654	1.44
3.28	4.985	216.346	1.23
3.38	4.785	207.666	1.3
3.38	4.829	209.576	1.55
3.47	6.16	267.34	1.5
3.48	4.9	212.657	1.3
3.48	4.907	212.961	1.63
3.48	5.088	220.816	1.39
3.48	5.589	242.559	1.49
3.57	5.086	220.729	1.33
3.58	4.834	209.793	1.31
3.58	5.006	217.257	1.21
3.58	5.01	217.431	1.23
3.77	5.74	249.113	1.27
3.78	4.916	213.352	1.54
3.78	5.015	217.648	1.18
3.78	5.086	220.729	1.22
3.87	5.045	218.95	1.15
3.97	4.526	196.426	1.4
3.97	4.918	213.438	1.26
3.97	4.937	214.263	1.19
4.07	4.886	212.05	1.36
4.07	4.909	213.048	1.07
4.07	4.941	214.437	1.42
4.07	4.957	215.131	1.42
4.17	4.817	209.055	1.37
4.17	5.042	218.82	1.17
4.27	4.868	211.268	1.35
4.27	4.884	211.963	1.59
4.27	4.939	214.35	1.2
4.27	4.994	216.737	1.23
4.27	5.026	218.125	1.37
4.37	4.618	200.419	1.43
4.37	4.886	212.05	1.27
4.37	5.052	219.254	1.19
4.67	4.834	209.793	1.59
4.67	4.882	211.876	1.42
4.77	4.859	210.878	1.3
4.77	4.873	211.485	1.42
4.87	4.857	210.791	1.49
4.87	4.859	210.878	1.35
4.87	4.967	215.565	1.36
4.97	4.861	210.965	1.32
4.97	4.902	212.744	1.33
5.17	4.778	207.362	1.44
5.17	4.951	214.871	1.47
5.27	4.923	213.655	1.29
5.36	4.928	213.872	1.29
5.76	4.971	215.739	1.43
5.86	4.921	213.569	1.52
6.06	4.962	215.348	1.34
6.26	4.854	210.661	1.34
6.26	5.003	217.127	1.49
6.35	6.947	301.496	1.97
6.36	4.951	214.871	1.52
6.46	4.953	214.957	1.51
6.66	4.868	211.268	1.57
6.86	4.875	211.572	1.41
6.95	4.815	208.968	1.2
7.05	4.719	204.802	1.25
7.05	4.836	209.88	1.29
8.25	4.82	209.185	1.57
8.91	6.064	263.174	1.19
8.91	6.119	265.561	1.09
9.13	5.986	259.789	2.01
9.25	4.85	210.487	1.64
9.32	6.149	266.863	1.33
9.9	5.977	259.398	1.18
9.9	6.025	261.481	1.3
9.93	5.075	220.252	1.37
10.74	4.893	212.353	1.62
11.89	6.018	261.178	1.19
11.89	6.105	264.953	1.16
13.01	4.916	213.352	1.25
13.61	4.962	215.348	1.58
18.96	5.077	220.339	1.55
19.03	5.864	254.494	1.87
19.32	6.091	264.346	1.73
19.47	4.847	210.357	1.74
20.4	4.606	199.898	1.88
20.9	6.179	268.165	1.55
21.19	6.309	273.807	1.69
21.69	6.28	272.548	1.68
25.43	4.98	216.129	1.34
28.71	5.132	222.726	1.08
28.72	6.018	261.178	1.25
29.61	4.836	209.88	1.43
29.71	6.02	261.264	1.11
29.71	6.059	262.957	1.19
30.7	6.048	262.48	1.14
30.7	6.126	265.865	1.2
40	4.675	202.892	1.86
40.04	4.948	214.74	1.49
41.22	4.898	212.57	1.24
41.69	6.158	267.254	1.57
43.32	4.797	208.187	1.72
43.69	5.999	260.353	1.59
44.07	5.988	259.876	1.17
44.2	5.451	236.57	1.08
44.36	5.733	248.809	1.47
46.25	6.048	262.48	1.34
48.43	4.71	204.411	1.4
49.57	4.884	211.963	1.44
49.87	5.003	217.127	1.43
50.2	4.957	215.131	1.12
50.49	4.82	209.185	1.57
50.67	4.955	215.044	1.54
51.94	5.274	228.889	1.35
52.02	4.866	211.182	1.18
52.09	5.215	226.328	1.14
52.18	4.661	202.285	1.4
53.08	4.723	204.975	1.58
58.43	5.926	257.185	1.12
59.42	6.045	262.349	1.06
59.42	6.119	265.561	1.07
59.8	4.533	196.73	1.72
60.41	6.048	262.48	1.12
60.6	6.107	265.04	1.13
63.38	6.013	260.961	1.07
67.78	5.582	242.256	2.84
67.85	5.104	221.511	1.61
69.15	5.619	243.861	1
69.52	5.956	258.487	1.2
71.2	5.768	250.328	0.97
71.55	5.299	229.974	0.96
76.68	4.893	212.353	1.2
77.23	6.096	264.563	1.09
78.47	5.019	217.822	1.21
79.27	4.834	209.793	1.28
79.41	6.126	265.865	1.02
81.2	2.27	98.5167	0.77
90.89	4.946	214.654	1.54
92.72	5.21	226.111	1.17
97.53	5.219	226.502	1.29
97.72	6.087	264.172	0.96
97.76	5.006	217.257	1.11
98.02	5.954	258.4	1.08
98.03	5.931	257.402	1.01
98.16	5.286	229.409	1.42
98.2	4.703	204.107	0.75
98.24	4.111	178.415	0.92
99.02	5.997	260.266	1.07
99.02	6.075	263.651	0.88
99.06	5.648	245.12	0.96
99.14	4.985	216.346	1.49
99.5	1.57	68.1371	0.48
99.5	4.345	188.57	0.84
99.51	5.986	259.789	0.95
99.58	4.703	204.107	1.49
99.63	4.902	212.744	1.35
99.78	7.058	306.313	0.91
99.93	4.99	216.563	1.47
99.99	4.239	183.97	1.31
100.01	6.068	263.348	1.19
100.17	4.946	214.654	1.44
100.33	4.93	213.959	1.33
100.82	4.999	216.954	1.46
101.54	4.762	206.668	1.05
101.91	5.052	219.254	1.2
101.96	5.033	218.429	1.42
101.98	4.838	209.966	1.11
102.19	5.807	252.02	0.96
102.46	7.68	333.308	0.78
102.86	5.29	229.583	0.98
114.81	4.889	212.18	1.15
123.68	4.772	207.102	0.62
124.83	4.861	210.965	1.55
128.81	4.971	215.739	1.22
139.36	4.801	208.361	1.11
147.07	4.622	200.592	1
147.1	4.87	211.355	1
147.11	6.146	266.733	0.92
148.29	4.638	201.286	1.08
148.5	4.744	205.887	1.28
148.51	6.096	264.563	0.96
148.63	4.342	188.44	1.09
148.82	5.309	230.408	0.92
148.86	6.874	298.328	0.88
149.05	4.459	193.518	1.32
149.18	4.896	212.484	1.18
149.48	4.655	202.024	1.1
149.72	4.98	216.129	1.12
149.9	1.72	74.647	0.5
150.19	2.713	117.743	0.66
150.3	5.816	252.411	0.95
150.33	4.544	197.207	1.32
150.67	3.567	154.806	0.78
150.82	4.588	199.117	1
150.97	3.42	148.426	0.75
151.07	4.535	196.816	1.11
151.07	4.974	215.869	1.18
151.56	3.709	160.968	1.07
152.14	4.599	199.594	0.98
156.21	4.485	194.646	1
171.57	4.003	173.728	0.64
179.14	4.618	200.419	1.04
182.5	4.57	198.335	0.95
189.79	4.673	202.805	1.01
190.92	4.283	185.88	1.06
193.31	3.298	143.131	0.74
196.54	6.468	280.707	0.62
197.08	5.628	244.252	0.93
197.26	4.896	212.484	1.06
197.64	5.368	232.968	0.92
197.81	4.87	211.355	0.99
198.11	4.361	189.265	0.96
198.21	4.618	200.419	1
198.3	5.798	251.63	0.93
198.73	4.434	192.433	1.12
198.92	4.521	196.209	0.97
199.09	4.115	178.589	1
199.19	4.905	212.874	1
199.3	4.083	177.2	1.1
199.34	3.463	150.292	0.87
199.62	4.581	198.813	0.95
199.69	4.446	192.954	0.9
199.71	4.439	192.65	0.94
199.8	1.82	78.9869	0.54
200.01	4.657	202.111	0.94
200.15	4.531	196.643	0.93
200.26	6.087	264.172	0.94
200.45	4.751	206.191	0.96
200.91	4.455	193.344	0.89
208.32	4.544	197.207	0.91
219.37	4.372	189.742	0.97
220.78	3.585	155.587	0.88
222.55	4.586	199.03	0.9
223.01	4.524	196.339	0.92
223.34	4.446	192.954	1.05
223.44	4.645	201.59	0.87
223.84	4.443	192.824	0.95
225.72	4.599	199.594	0.92
230.65	4.425	192.042	0.87
244.15	4.37	189.655	0.81
246.64	6.156	267.167	0.9
247.05	5.579	242.125	0.91
247.29	4.505	195.514	0.97
247.66	4.528	196.513	0.91
247.77	4.489	194.82	0.79
248.3	4.586	199.03	0.9
248.59	4.71	204.411	0.99
248.72	3.181	138.054	0.73
248.77	4.574	198.509	0.96
248.85	4.342	188.44	0.88
248.95	4.648	201.72	0.9
249.44	4.762	206.668	0.94
249.45	4.184	181.583	0.98
249.64	4.515	195.948	0.9
250.03	4.583	198.9	0.9
250.58	3.307	143.522	0.7
251.41	2.554	110.842	0.58
251.91	4.14	179.674	0.93
257.64	4.478	194.343	0.92
262.94	4.551	197.511	1.09
267.86	4.528	196.513	0.9
268.2	4.524	196.339	0.93
272.36	4.209	182.668	0.82
272.68	4.751	206.191	0.99
273.95	4.586	199.03	0.89
276.03	4.531	196.643	0.89
283.24	4.54	197.033	1.02
284.44	4.714	204.585	0.94
294.4	3.133	135.97	0.58
295.35	5.717	248.114	0.91
295.64	4.216	182.972	0.98
295.72	4.698	203.89	1.01
295.78	4.494	195.037	0.86
296.14	3.443	149.424	0.57
296.34	5.729	248.635	0.92
296.58	3.994	173.337	0.81
296.58	4.535	196.816	0.9
297.04	4.831	209.663	0.89
297.07	4.668	202.588	0.98
297.2	1.45	62.9292	0.41
297.27	4.572	198.422	0.94
297.43	4.593	199.334	0.88
297.53	6.027	261.568	0.93
297.58	4.154	180.281	0.92
297.7	4.925	213.742	1
297.74	2.945	127.811	0.68
297.91	6.016	261.091	0.87
298.08	4.613	200.202	0.9
298.17	4.069	176.592	0.87
298.56	3.725	161.663	0.77
298.9	6.027	261.568	1.03
299.58	4.081	177.113	0.92
299.85	4.629	200.896	1.11
299.99	4.905	212.874	0.79
300.22	4.831	209.663	0.96
300.34	4.496	195.124	0.85
315.1	3.241	140.658	0.72
321.93	4.627	200.809	0.94
332.98	4.577	198.639	0.87
345.72	5.529	239.955	0.92
346.06	3.776	163.876	0.46
346.29	5.619	243.861	0.93
347.22	4.641	201.417	0.85
347.43	5.013	217.561	0.79
347.96	4.317	187.355	0.78
348.13	4.673	202.805	0.97
348.66	4.508	195.645	0.87
349.45	4.2	182.278	0.8
349.64	4.416	191.652	0.86
349.85	4.567	198.205	0.82
372.31	4.664	202.415	0.88
393.66	4.648	201.72	0.96
395.52	4.879	211.746	1.03
395.55	3.984	172.903	0.93
395.64	3.707	160.882	0.75
395.76	6.045	262.349	1
395.84	4.875	211.572	1.03
395.84	5.717	248.114	0.91
396.23	4.877	211.659	0.99
396.65	4.235	183.797	0.78
396.7	5.747	249.416	0.91
396.79	5.949	258.183	0.93
396.94	6.087	264.172	0.87
397.16	4.257	184.751	0.84
397.19	2.75	119.348	0.62
397.37	3.764	163.355	0.77
397.45	4.517	196.035	0.88
397.55	4.264	185.055	0.78
397.61	4.524	196.339	0.9
397.84	4.997	216.867	0.42
397.85	4.37	189.655	0.79
398.09	4.515	195.948	0.85
398.11	3.564	154.676	0.81
398.75	6.185	268.425	0.94
398.81	3.73	161.88	0.88
399.1	1.23	53.3813	0.36
399.48	3.417	148.296	0.69
399.83	4.198	182.191	0.75
423.36	4.726	205.106	0.94
443.66	4.297	186.487	0.87
444.2	4.163	180.672	0.62
444.29	5.798	251.63	0.92
445.45	4.521	196.209	0.93
445.88	4.462	193.648	0.86
446.14	4.163	180.672	0.96
446.44	6.245	271.029	0.84
446.93	4.161	180.585	0.79
447.43	4.512	195.818	0.84
447.96	2.633	114.271	0.66
448.63	6.114	265.344	0.92
448.91	4	173.598	0.72
449.61	4.156	180.368	0.78
473.96	2.633	114.271	0.64
492.18	4.271	185.359	0.95
493.07	6.066	263.261	0.93
493.95	4.228	183.493	0.85
494.02	5.827	252.888	0.92
494.32	3.75	162.748	0.85
494.59	4.889	212.18	0.82
495.01	3.998	173.511	0.75
495.04	5.065	219.818	0.86
495.31	4.186	181.67	0.73
495.4	4.62	200.505	0.91
495.63	6.087	264.172	0.93
495.63	6.291	273.026	1
495.7	3.619	157.062	0.67
495.72	3.119	135.363	0.69
495.75	4.622	200.592	0.82
495.91	4.317	187.355	0.9
496.03	4.246	184.274	0.88
496.28	4.455	193.344	0.91
496.29	2.727	118.35	0.62
496.62	5.974	259.268	0.99
496.64	5.41	234.791	0.53
496.8	4.007	173.901	0.71
496.94	6.045	262.349	0.89
497.15	4.537	196.903	0.96
497.29	4.202	182.364	0.75
497.59	4.473	194.126	-3.48
497.6	6.066	263.261	0.97
497.66	3.36	145.822	0.68
497.94	4.381	190.133	0.9
542.74	5.777	250.718	0.87
543.33	5.159	223.898	0.76
544.17	5.07	220.035	0.62
544.37	3.746	162.574	0.74
544.66	5.965	258.878	0.9
545.08	4.15	180.108	0.94
545.16	4.492	194.95	0.79
545.91	6.355	275.803	0.84
547.03	5.203	225.807	0.73
547.05	4.285	185.967	0.83
548.73	4.223	183.276	0.79
549.53	2.688	116.658	0.56
554	3.362	145.909	0.72
567.67	2.662	115.529	0.63
591.44	3.989	173.12	0.81
591.94	3.906	169.518	0.85
592.8	6.096	264.563	0.93
592.84	5.917	256.794	0.9
593.14	4.519	196.122	0.93
593.53	4.79	207.883	0.69
593.73	3.916	169.952	0.77
593.82	5.185	225.026	0.84
593.91	4.053	175.898	0.69
594.61	4.01	174.032	0.74
594.91	4.2	182.278	0.85
595.02	4.014	174.205	0.79
595.5	3.645	158.191	0.7
595.5	4.193	181.974	0.89
595.62	3.53	153.2	0.81
595.95	3.069	133.193	0.67
595.96	4.005	173.815	0.86
595.98	3.417	148.296	0.65
596.13	4.03	174.9	0.8
596.38	6.739	292.469	1.03
596.39	6.546	284.093	1.04
596.98	4.168	180.889	0.74
597.3	5.876	255.015	0.89
597.38	3.886	168.65	0.74
597.49	3.041	131.978	0.67
598.16	6.594	286.176	0.56
598.42	2.795	121.301	0.63
619.5	3.989	173.12	0.9
633.91	6.821	296.027	1.02
640.54	5.825	252.802	0.9
643.55	3.893	168.954	0.77
643.88	5.706	247.637	0.89
644.36	3.911	169.735	0.84
648.98	2.798	121.432	0.55
660.57	6.771	293.857	1.06
661.14	2.791	121.128	0.68
676.27	6.367	276.324	0.87
684.72	3.665	159.059	0.81
691.05	4.829	209.576	0.59
691.18	2.979	129.287	0.69
691.18	5.816	252.411	0.9
691.55	4.769	206.972	0.81
691.63	4.82	209.185	0.75
691.7	2.924	126.9	0.62
691.82	4.016	174.292	0.84
692.08	5.678	246.422	0.97
692.16	6.908	299.803	1.1
692.16	6.94	301.192	0.99
692.57	3.741	162.357	0.72
692.7	5.428	235.572	0.78
692.96	3.42	148.426	0.88
692.97	6.025	261.481	0.91
693.15	6.934	300.932	1.05
693.26	3.663	158.972	0.75
693.58	3.899	169.214	0.74
693.8	4.769	206.972	0.73
693.85	3.681	159.753	0.72
694.26	2.919	126.683	0.67
694.65	3.798	164.831	0.74
694.81	5.55	240.867	0.92
694.98	3.741	162.357	0.81
695.12	6.895	299.239	1.1
695.19	2.997	130.068	0.62
695.22	5.586	242.429	0.89
695.43	2.981	129.374	0.71
696.22	2.91	126.292	0.58
696.83	3.486	151.29	0.73
711.9	6.915	300.107	1.13
730.65	6.929	300.715	1.05
732.63	6.938	301.105	1.06
740.58	3.755	162.965	0.76
741.11	4.939	214.35	0.8
742.8	3.817	165.656	0.79
743.12	3.528	153.113	0.8
749.41	6.901	299.499	1
750.39	6.934	300.932	1.04
772.1	6.899	299.413	1.18
782.96	6.913	300.02	1.1
788.6	5.855	254.104	0.88
789.72	5.765	250.198	0.88
790.85	5.834	253.192	0.88
790.85	6.918	300.237	1.11
790.85	6.918	300.237	1.16
790.91	5.017	217.735	0.82
790.97	4.987	216.433	0.81
791.67	3.328	144.433	0.71
791.75	3.498	151.811	0.64
791.97	3.264	141.656	0.82
792.16	3.397	147.428	0.68
792.34	3.753	162.878	0.77
792.7	3.553	154.198	0.69
793	4.689	203.5	0.53
793.35	3.608	156.585	0.73
793.44	2.848	123.602	0.58
793.97	3.459	150.119	0.71
793.99	2.984	129.504	0.72
794.14	3.369	146.213	0.73
794.18	3.142	136.361	0.68
794.22	3.121	135.45	0.66
794.28	5.729	248.635	0.93
794.81	3.179	137.967	0.7
794.82	5.91	256.491	0.85
795.13	3.479	150.987	0.68
795.27	3.434	149.034	0.6
795.76	5.008	217.344	0.81
795.9	2.334	101.294	0.62
796.77	6.899	299.413	0.99
820.45	6.918	300.237	1.04
839.41	4.179	181.366	0.75
840.33	4.714	204.585	1.59
841.1	5.756	249.807	0.92
841.98	3.163	137.272	0.63
842.11	4.111	178.415	0.84
842.14	3.555	154.285	0.8
842.32	3.417	148.296	0.67
842.42	3.624	157.279	0.69
842.84	3.245	140.831	0.66
843.4	3.142	136.361	0.75
846.1	6.92	300.324	1.18
887.15	5.378	233.402	0.86
887.34	5.088	220.816	0.82
888.97	4.997	216.867	0.58
889.22	5.187	225.113	0.85
889.28	5.864	254.494	0.89
889.76	6.025	261.481	0.9
890.72	5.747	249.416	0.97
890.74	5.825	252.802	0.92
891.22	3.867	167.826	0.88
891.4	3.613	156.802	0.75
891.63	3.5	151.898	0.75
892.18	3.468	150.509	0.71
892.32	3.828	166.133	0.78
892.51	3.498	151.811	0.74
892.61	3.555	154.285	0.78
892.76	3.215	139.529	0.58
893.1	3.349	145.345	0.8
893.28	2.789	121.041	0.64
893.31	3.695	160.361	0.69
893.5	3.392	147.211	0.72
893.52	3.601	156.281	0.71
893.99	3.516	152.592	0.71
894.39	3.408	147.905	0.7
940.94	4.058	176.115	0.75
941.63	3.541	153.677	0.71
943.12	3.562	154.589	0.66
943.86	5.137	222.943	0.84
945.42	3.378	146.603	0.8
945.56	3.3	143.218	0.73
986.88	5.924	257.098	0.83
987.05	5.476	237.655	0.88
987.97	6.247	271.116	0.98
988.09	5.637	244.643	0.86
988.21	5.536	240.259	0.93
989.1	5.476	237.655	0.84
989.14	5.217	226.415	0.64
989.18	3.417	148.296	0.66
989.94	4.179	181.366	0.86
990.23	3.619	157.062	0.69
990.25	5.919	256.881	0.9
990.55	4.035	175.117	0.77
990.6	3.546	153.894	0.66
990.7	2.89	125.424	0.71
990.78	5.887	255.492	0.94
990.92	3.704	160.751	0.7
991	4.104	178.111	0.77
991.27	3.911	169.735	0.7
991.51	3.652	158.495	0.77
991.72	4.039	175.29	0.79
991.98	5.928	257.272	0.94
992.4	3.759	163.138	0.74
992.5	2.984	129.504	0.61
992.78	6.128	265.952	0.86
993.2	4.326	187.746	0.74
1014.84	4.62	200.505	0.9
1038.63	4.039	175.29	0.81
1039.39	4.329	187.876	0.83
1039.81	4.095	177.721	0.75
1081.18	3.876	168.216	0.79
1085.04	4.17	180.976	0.82
1085.53	6.28	272.548	1.01
1086.11	6.055	262.783	0.89
1086.38	4.622	200.592	0.93
1087.93	5.919	256.881	0.91
1088.13	4.746	205.974	0.88
1089.23	4.471	194.039	0.87
1090.2	3.977	172.599	0.85
1090.34	4.437	192.563	0.77
1090.42	6.027	261.568	0.96
1090.52	4.414	191.565	0.83
1090.9	5.736	248.939	0.87
1091.05	4.632	201.026	0.85
1091.16	4.944	214.567	0.81
1091.75	4.297	186.487	0.72
1091.88	6.091	264.346	0.92
1092.75	3.92	170.126	0.79
1094.44	3.773	163.746	0.68
1138.46	4.117	178.675	0.75
1159.49	4.769	206.972	0.9
1162.36	6.337	275.022	1.07
1163.6	5.295	229.8	1
1186.75	5.915	256.708	0.92
1187.09	3.927	170.43	0.78
1187.24	5.086	220.729	0.91
1188.42	6.169	267.731	0.89
1188.99	4.425	192.042	0.85
1189.49	4.675	202.892	0.83
1190.57	4.469	193.952	0.84
1201.04	6.094	264.476	0.93
1206.6	5.058	219.514	0.82
1222.42	6.286	272.809	1.05
1223.4	6.286	272.809	1.05
1233.87	5.297	229.887	1.01
1234.74	6.013	260.961	0.93
1235.06	4.549	197.424	0.88
1236.01	3.819	165.742	0.74
1236.97	5.983	259.659	0.94
1237.1	5.286	229.409	0.84
1237.1	6.309	273.807	0.9
1237.24	6.117	265.474	1
1238.18	4.198	182.191	0.87
1242.97	4.742	205.8	0.96
1278.36	5.614	243.644	0.86
1287.82	5.478	237.742	0.99
1288.16	4.857	210.791	0.84
1288.25	4.4	190.957	0.78
1288.33	5.182	224.896	0.9
1288.45	5.316	230.711	0.88
1288.97	5.389	233.879	0.78
1289.11	4.673	202.805	0.76
1289.83	4.384	190.263	0.85
1291.55	4.815	208.968	0.83
1332.29	5.27	228.715	1.05
1334.19	5.396	234.183	0.93
1373.59	6.071	263.478	0.94
1379.29	6.094	264.476	0.96
1382.96	6.227	270.248	1.03
1384.21	4.925	213.742	0.89
1384.46	6.162	267.427	1
1386.55	4.397	190.827	0.8
1386.58	5.159	223.898	0.89
1386.88	5.662	245.727	0.88
1387.47	5.538	240.346	0.96
1388.04	4.824	209.359	0.97
1392.48	5.231	227.022	0.96
1434.64	6.576	285.395	0.85
1434.72	5.506	238.957	0.92
1435.13	5.763	250.111	0.87
1435.65	5.756	249.807	0.96
1481.9	6.183	268.339	0.96
1482.26	5.306	230.277	0.93
1482.56	6.165	267.557	1
1483.44	5.869	254.711	0.94
1484.37	5.892	255.709	1.06
1484.68	5.596	242.863	0.91
1484.9	4.668	202.588	0.89
1484.96	5.288	229.496	0.9
1485	4.896	212.484	0.9
1485.19	5.804	251.89	1.03
1485.81	5.742	249.199	0.86
1486.15	4.795	208.1	0.87
1487.03	4.772	207.102	0.91
1487.21	4.801	208.361	0.87
1488.63	5.008	217.344	0.88
1528.82	5.283	229.279	1
1532.56	6.181	268.252	1.03
1533.37	5.938	257.706	1.1
1533.49	5.781	250.892	0.97
1533.63	6.596	286.263	0.92
1539.03	5.566	241.561	1.02
1582.46	5.591	242.646	1.08
1583.03	6.238	270.726	0.97
1583.3	5.125	222.422	0.9
1583.86	6.004	260.57	0.89
1583.99	5.435	235.876	0.97
1584.94	4.694	203.717	0.88
1585.22	6.224	270.118	1
1632.06	6.052	262.653	0.94
1632.74	5.926	257.185	1.02
1634.24	4.847	210.357	0.88
1634.35	5.933	257.489	1.06
1636.52	5.056	219.427	0.86
1680.16	6.254	271.42	1.04
1680.32	6.415	278.407	1.04
1682.37	5.132	222.726	0.96
1682.57	5.072	220.122	0.93
1686.65	5.694	247.116	1.02
1722.75	5.997	260.266	1
1727.79	6.078	263.782	0.97
1728.37	6.254	271.42	0.99
1728.48	5.605	243.254	-1.25
1730.07	6.087	264.172	1.16
1730.23	6.039	262.089	0.88
1732.05	5.862	254.407	0.95
1733.15	5.832	253.105	0.42
1733.2	5.676	246.335	1.07
1778.19	6.328	274.632	0.94
1780.54	6.183	268.339	0.98
1780.97	5.054	219.341	0.9
1781.15	6.142	266.559	0.99
1781.3	5.366	232.881	1
1781.93	5.979	259.485	1.01
1782.09	5.635	244.556	1.01
1782.84	4.896	212.484	0.85
1783.44	4.971	215.739	0.89
1828.75	6.087	264.172	1.01
1829.47	5.747	249.416	1.11
1829.9	6.091	264.346	0.96
1831.47	5.777	250.718	1.07
1833.48	5.224	226.719	0.86
1877.04	5.32	230.885	0.96
1878.82	6.599	286.393	0.99
1879.3	5.283	229.279	1.35
1880.17	5.729	248.635	1.06
1926.49	5.003	217.127	0.87
1926.69	6.057	262.87	1.04
1929.96	4.923	213.655	0.91
1966.7	6.592	286.089	1.15
1973.71	6.263	271.811	0.99
1974.65	6.183	268.339	1
1974.74	6.335	274.935	1.01
1974.85	6.234	270.552	0.94
1974.9	6.162	267.427	1.02
1976.62	5.841	253.496	0.97
1976.62	6.167	267.644	0.9
1977.02	5.242	227.5	0.93
1977.16	5.566	241.561	0.95
1977.95	5.685	246.726	1.2
1978.14	6.126	265.865	0.98
1978.26	6.089	264.259	1.01
1978.54	5.747	249.416	0.95
1979.33	5.99	259.963	1.06
1980.52	5.843	253.583	1.08
1982.84	5.435	235.876	1.02
1983.77	5.205	225.894	0.96
1987.55	6.123	265.735	1.02
2008.91	4.992	216.65	0.89
2024.57	6.139	266.429	1.1
2028.14	6.156	267.167	0.95
2073.99	5.478	237.742	0.79
2074.28	5.515	239.348	0.99
2075.02	6.123	265.735	1.01
2078.29	5.949	258.183	0.93
2123.03	6.19	268.642	1
2126.05	5.788	251.196	1.11
2126.81	6.066	263.261	1.07
2170.24	5.32	230.885	0.95
2170.79	6.183	268.339	0.99
2173.33	5.791	251.326	0.93
2174.49	6.133	266.169	1.04
2174.64	5.759	249.937	1.03
2175.1	5.619	243.861	1.08
2176.21	5.894	255.796	1.05
2176.23	6.213	269.641	0.98
2220.55	6.073	263.565	1.01
2221.84	6.144	266.646	0.99
2222.22	6.119	265.561	1.08
2223.28	6.128	265.952	1.04
2224.62	5.894	255.796	1.05
2224.87	4.951	214.871	0.86
2225.07	5.775	250.632	0.98
2225.33	6.002	260.483	1.06
2270.12	6.181	268.252	1.02
2270.53	6.146	266.733	0.96
2271.06	6.185	268.425	1.02
2274.1	5.619	243.861	0.93
2274.39	5.639	244.729	0.86
2320.05	5.988	259.876	1.04
2321.69	6.091	264.346	1.03
2367.48	6.222	270.031	1
2367.79	6.197	268.946	1.08
2370.55	6.142	266.559	1
2370.74	5.435	235.876	0.92
2371.48	5.662	245.727	0.97
2372.11	6.002	260.483	1.08
2372.46	5.804	251.89	0.9
2391.31	6.183	268.339	0.96
2416.78	6.199	269.033	1.04
2420.55	5.779	250.805	1.1
2420.66	5.915	256.708	1.08
2438.36	5.456	236.787	1.09
2465.45	6.018	261.178	1.02
2467	6.075	263.651	1.1
2467.92	5.956	258.487	1.01
2468.32	5.795	251.5	0.98
2468.42	6.156	267.167	1.13
2469.05	6.032	261.785	0.98
2469.37	5.855	254.104	0.99
2470.88	5.651	245.25	1
2470.97	5.788	251.196	1.07
2471.07	5.717	248.114	0.9
2471.66	5.417	235.095	0.98
2472.91	4.951	214.871	0.91
2473.28	5.784	251.022	1.03
2516.22	6.011	260.874	1.2
2517.15	6.13	266.038	0.99
2519.67	6.02	261.264	1.04
2556.51	6.179	268.165	1.01
2564.34	6.055	262.783	1.07
2564.38	6.245	271.029	1.04
2565.22	5.641	244.816	1.03
2567.09	5.818	252.498	0.93
2567.14	5.428	235.572	0.93
2568.02	5.999	260.353	1
2568.68	6.238	270.726	1.03
2660.51	5.736	248.939	0.95
2666.2	5.71	247.811	0.93
2666.6	5.924	257.098	1
2666.74	6.022	261.351	1.06
2673.73	5.614	243.644	0.96
2711.65	6.268	272.028	1.04
2712.06	5.832	253.105	0.99
2714.04	6.087	264.172	0.82
2714.56	6.036	261.959	0.99
2716.26	6.045	262.349	1.02
2716.91	5.793	251.413	1.1
2718.11	4.957	215.131	0.92
2757.77	6.309	273.807	1.04
2757.89	6.018	261.178	1.07
2762.62	6.24	270.812	0.94
2762.66	5.538	240.346	0.92
2763.5	5.651	245.25	0.94
2763.69	6.169	267.731	0.93
2765.07	5.811	252.194	0.92
2809.18	6.084	264.042	1.02
2813.35	6.004	260.57	1.13
2814.3	6.004	260.57	1.03
2858.21	5.736	248.939	0.9
2860.89	6.289	272.939	1
2860.96	5.708	247.724	0.98
2910.89	5.915	256.708	1.05
2935.79	5.993	260.093	1.08
2955.87	6.348	275.499	1.07
2956.01	6.123	265.735	1.04
2956.48	5.504	238.87	1.16
2957.39	6.057	262.87	1.24
2958.18	6.078	263.782	1.2
2959.02	5.885	255.406	0.92
2959.15	5.651	245.25	0.96
2959.44	5.834	253.192	0.91
2959.46	6.098	264.65	1.05
2959.64	5.644	244.946	0.95
2959.87	5.577	242.039	0.92
2960	6.277	272.418	1.06
2960.72	5.809	252.107	1.01
2962.84	4.957	215.131	0.9
2965.97	5.584	242.342	0.97
2999.18	6.188	268.556	1.02
3004.45	6.282	272.635	0.98
3055.89	6.073	263.565	1.03
3057.8	5.896	255.883	1.1
3058.77	6.011	260.874	1.02
3060.72	6.107	265.04	1.03
3101.1	6.383	277.018	1.07
3108.67	5.99	259.963	1.07
3152.61	6.28	272.548	0.92
3156.13	6.296	273.243	0.99
3156.38	5.903	256.187	0.98
3157.17	5.701	247.42	0.97
3157.94	5.963	258.791	0.99
3178.99	5.662	245.727	0.92
3201.43	6.142	266.559	1.02
3201.81	6.135	266.255	1.03
3203.79	6.13	266.038	1.02
3206.61	4.96	215.261	0.89
3250.38	6.073	263.565	1.11
3250.78	5.798	251.63	0.99
3255.29	6.128	265.952	1.08
3262.94	6.371	276.498	1.05
3297.34	6.266	271.941	0.92
3300.76	6.142	266.559	1.12
3302.2	6.238	270.726	1.01
3350.45	5.983	259.659	1.12
3351.68	5.903	256.187	0.92
3351.82	5.958	258.574	1.1
3401.87	5.99	259.963	1.03
3442.18	5.485	238.046	0.98
3445.45	5.694	247.116	0.94
3446.92	6.156	267.167	1.2
3447.8	6.142	266.559	1.01
3448.48	5.706	247.637	0.93
3448.63	6.146	266.733	0.88
3450.2	4.967	215.565	0.85
3450.23	6.323	274.415	1
3474.23	6.156	267.167	1.11
3495.19	6.087	264.172	1.07
3544.66	6.126	265.865	1.13
3547.5	5.798	251.63	0.95
3547.88	5.935	257.576	1
3593.48	6.27	272.114	0.94
3599.01	6.073	263.565	1.15
3644.18	6.009	260.787	1.08
3646.32	6.02	261.264	1.11
3688.8	6.192	268.729	1.01
3693.1	6.13	266.038	0.97
3693.41	6.139	266.429	1.01
3693.42	5.694	247.116	0.92
3736.69	6.089	264.259	1.08
3740.92	6.3	273.416	0.96
3742.33	5.931	257.402	0.96
3788.99	6.144	266.646	1.02
3792.09	5.848	253.8	0.98
3839.45	5.706	247.637	0.74
3839.82	6.043	262.263	1.07
3842.7	6.084	264.042	1.15
3913.8	5.967	258.964	0.93
3926.8	5.345	231.97	0.85
3932.44	5.974	259.268	1.05
3933.78	6.114	265.344	1.04
3933.88	6.192	268.729	1.01
3936.72	5.719	248.201	0.97
3939.31	4.978	216.042	0.88
3939.93	6.11	265.17	1
3940.72	5.926	257.185	0.98
3947.11	5.495	238.48	0.95
3949.57	5.476	237.655	0.97
3983.1	6.034	261.872	0.94
3985.69	6.252	271.333	0.94
4034.69	6.082	263.955	1
4035.12	6.229	270.335	1.03
4035.31	6.052	262.653	1.06
4039.97	6.098	264.65	1.13
4083.99	5.894	255.796	0.96
4176.82	6.098	264.65	1.02
4178.3	6.094	264.476	1.03
4180.01	5.903	256.187	1.04
4180.06	6.082	263.955	0.99
4183.37	4.99	216.563	0.87
4225.73	6.022	261.351	1.06
4229.64	5.726	248.505	0.86
4230.03	5.701	247.42	0.89
4233.76	6.05	262.566	1.14
4282.37	5.99	259.963	1
4316.77	6.117	265.474	0.97
4323.43	6.055	262.783	0.98
4373.91	6.218	269.858	0.91
4418.67	6.052	262.653	1.05
4420.11	5.295	229.8	0.84
4421.62	6.059	262.957	0.99
4422.53	5.795	251.5	0.88
4424.4	6.048	262.48	0.87
4427.15	4.983	216.259	0.91
4428.06	6.027	261.568	1.04
4428.4	5.515	239.348	0.91
4434.01	5.345	231.97	0.88
4507.15	5.85	253.887	0.96
4520.4	5.816	252.411	1.01
4520.8	5.956	258.487	0.98
4520.9	5.74	249.113	0.95
4618.56	5.71	247.811	0.88
4662.69	6.009	260.787	0.97
4663.53	6.009	260.787	1.03
4664.22	6.034	261.872	0.76
4665.95	5.974	259.268	1.06
4668.92	4.974	215.869	0.86
4669.07	5.775	250.632	0.88
4718.4	5.495	238.48	0.3
4754.75	6.172	267.861	0.9
4809.28	5.781	250.892	0.99
4811.98	5.873	254.885	0.99
4813.74	5.745	249.33	0.87
4831.77	5.999	260.353	0.93
4855.42	5.99	259.963	0.99
4887.99	4.987	216.433	0.87
4901.65	5.465	237.178	0.9
4902.18	5.552	240.954	0.9
4906.56	5.97	259.095	0.96
4908.8	5.901	256.1	1.02
4919.75	5.504	238.87	0.93
5006.03	5.717	248.114	0.88
5026.27	5.981	259.572	0.88
5028.02	5.965	258.878	0.88
5102.01	5.839	253.409	1.01
5150.66	6.032	261.785	0.9
5162.56	5.754	249.72	0.9
5198.18	5.777	250.718	0.95
5234.29	5.862	254.407	1.03
5252.18	5.485	238.046	0.93
5392.16	5.825	252.802	0.99
5394.68	5.713	247.941	0.92
5588.45	5.761	250.024	0.88
5608.02	5.804	251.89	0.96
5870.27	5.756	249.807	0.91

## Sheet: Southern Ocean
Water depth (m)	O2 ml/l	O2 umol/kg	d13C of DIC
0.69	7.755	336.562	1.39
0.7	5.417	235.095	1.3
1.48	8.061	349.843	1.6
1.49	6.008	260.744	1.81
1.58	8.227	357.047	1.12
1.59	5.534	240.172	1.33
1.59	6.286	272.809	2.17
1.59	6.605	286.653	1.9
1.69	5.947	258.096	1.21
1.69	6.943	301.322	1.82
1.79	6.196	268.903	1.84
1.88	6.541	283.876	1.93
1.98	6.698	290.689	1.7
2.08	6.424	278.798	1.75
2.08	7.76	336.779	1.4
2.18	5.062	219.688	1.96
2.18	5.713	247.941	1.98
2.18	7.712	334.696	1.61
2.18	7.918	343.637	1.53
2.28	5.575	241.952	2.03
2.28	6.429	279.015	1.93
2.38	6.543	283.962	1.88
2.38	7.927	344.027	1.64
2.48	4.932	214.046	1.17
2.48	5.29	229.583	2.02
2.48	7.895	342.638	1.54
2.57	7.764	336.953	1.25
2.58	5.106	221.597	1.2
2.68	5.463	237.091	1.39
2.68	5.863	254.451	2.01
2.78	5.439	236.049	1.97
2.78	5.52	239.565	1.46
2.78	6.516	282.791	1.8
2.87	6.557	284.57	1.89
2.87	6.852	297.373	1.7
2.87	8.222	356.83	1.39
2.87	8.249	358.002	1.59
2.88	4.982	216.216	1.1
2.88	6.362	276.107	1.85
2.97	6.665	289.257	1.64
2.97	6.929	300.715	1.72
2.97	7.239	314.168	1.98
2.98	5.258	228.194	1.69
2.98	5.669	246.031	1.52
3.07	6.693	290.472	1.8
3.08	4.775	207.232	1.3
3.17	6.121	265.648	1.74
3.17	6.631	287.782	1.63
3.17	7.326	317.944	1.59
3.18	5.791	251.326	1.92
3.27	6.847	297.156	1.6
3.27	7.87	341.553	0.9
3.27	7.992	346.848	1.7
3.28	4.955	215.044	1.06
3.28	5.079	220.426	1.13
3.28	5.508	239.044	1.49
3.37	6.362	276.107	1.88
3.37	6.645	288.389	1.58
3.37	6.976	302.754	2
3.37	7.33	318.118	1.6
3.37	7.948	344.939	1.15
3.47	5.04	218.733	1.13
3.47	6.153	267.037	1.87
3.47	6.589	285.959	1.85
3.47	6.665	289.257	1.8
3.47	7.689	333.698	1.45
3.47	7.721	335.087	1.56
3.48	5.322	230.972	1.93
3.56	7.7	334.176	1.46
3.57	6.484	281.402	1.62
3.57	7.009	304.187	1.72
3.67	5.343	231.883	0.89
3.67	6.734	292.252	1.46
3.76	7.836	340.078	0.94
3.76	7.946	344.852	1.3
3.77	6.583	285.698	1.58
3.77	6.691	290.385	1.71
3.86	6.823	296.114	1.85
3.86	7.941	344.635	1.36
3.86	8.28	359.347	1.41
3.87	5.125	222.422	1.03
3.87	7.161	310.783	1.68
3.96	7.342	318.639	1.9
4.16	7.562	328.186	1.82
4.16	7.735	335.694	1.32
4.17	5.768	250.328	1.8
4.17	5.91	256.491	1.53
4.26	7.732	335.564	1.27
4.26	8.083	350.797	1.38
4.27	5.747	249.416	1.04
4.27	6.748	292.859	1.73
4.36	7.989	346.718	1.69
4.37	5.855	254.104	1.39
4.45	7.854	340.859	1.12
4.46	6.807	295.42	1.75
4.46	7.516	326.19	1.6
4.47	5.701	247.42	1.28
4.47	6.123	265.735	1.96
4.56	7.585	329.185	1.75
4.65	7.535	327.015	1.07
4.66	5.1	221.337	1.03
4.66	5.573	241.865	1.53
4.66	6.555	284.483	1.65
4.66	6.608	286.783	1.76
4.66	6.789	294.639	1.72
4.66	7.012	304.317	1.78
4.66	7.282	316.035	1.49
4.67	5.021	217.908	1.23
4.67	5.187	225.113	1.59
4.75	7.567	328.403	1.77
4.75	7.622	330.79	1.4
4.75	7.84	340.251	1.56
4.85	7.09	307.702	1.7
4.85	7.56	328.1	1.69
4.85	7.588	329.315	1.78
4.85	7.693	333.872	0.6
4.85	7.941	344.635	1.37
4.86	5.364	232.794	1.93
4.86	6.268	272.028	1.64
4.86	6.757	293.25	1.46
4.86	6.764	293.554	2
4.86	7.142	309.959	1.38
4.86	7.152	310.393	1.85
4.95	6.911	299.933	1.85
4.95	7.556	327.926	1.79
4.95	7.771	337.257	1.1
5.05	7.204	312.649	1.62
5.05	7.631	331.181	1.5
5.05	7.829	339.774	1.09
5.06	7.039	305.488	1.5
5.15	6.504	282.27	1.73
5.15	7.023	304.794	1.54
5.15	7.409	321.546	1.63
5.16	5.332	231.406	2.31
5.25	7.918	343.637	1.28
5.26	6.84	296.852	1.84
5.26	6.943	301.322	1.81
5.45	7.455	323.543	1.59
5.45	7.546	327.492	1.71
5.45	8.29	359.781	1.61
5.55	7.542	327.318	1.58
5.56	5.586	242.429	1.89
5.56	6.52	282.964	1.71
5.65	6.626	287.565	1.56
5.66	5.892	255.709	0.98
5.75	7.113	308.7	1.76
5.76	5.017	217.735	1.03
5.76	5.106	221.597	1.52
5.76	5.251	227.89	1.84
5.84	7.937	344.461	1.3
5.85	8.093	351.231	1.39
5.94	7.037	305.402	1.46
5.94	7.971	345.937	1.35
5.95	7.466	324.02	1.36
5.96	5.063	219.731	1.02
6.26	5.274	228.889	1.67
6.34	7.852	340.772	3
6.35	5.166	224.201	1.19
6.35	5.986	259.789	1.17
6.45	5.065	219.818	1.23
6.45	6.387	277.192	1.46
6.54	6.679	289.865	2
6.65	5.791	251.326	1.56
6.75	5.178	224.722	1.21
6.84	7.363	319.55	1.57
6.85	5.977	259.398	1.96
7.04	7.344	318.725	1.6
7.04	7.351	319.029	1.67
7.04	7.365	319.637	1.62
7.13	7.728	335.391	1.45
7.14	6.778	294.161	1.69
7.25	4.638	201.286	1.14
7.43	6.668	289.387	1.9
7.43	7.507	325.799	1.6
7.53	7.723	335.174	1.59
7.54	7.074	307.007	1.41
7.62	7.927	344.027	1.3
7.62	7.939	344.548	1.4
7.72	7.999	347.152	1.3
7.73	6.67	289.474	1.74
7.73	7.461	323.803	1.5
7.73	7.904	343.029	1.75
7.74	6.18	268.208	1.89
7.75	5.114	221.945	1
7.83	7.581	329.011	1.6
7.83	8.149	353.662	1.01
7.94	6.265	271.897	2.2
8.02	7.87	341.553	1.2
8.03	6.782	294.335	1.76
8.04	5.522	239.652	1.49
8.12	7.666	332.7	1.1
8.14	5.57	241.735	2.28
8.22	6.944	301.366	1.8
8.22	7.785	337.864	1.71
8.32	7.549	327.622	1.47
8.34	4.795	208.1	1.2
8.44	5.058	219.514	1.13
8.52	8.37	363.253	1.49
8.62	6.705	290.993	1.64
8.62	7.229	313.734	1.8
8.63	5.189	225.2	1.5
8.71	7.39	320.722	1.7
8.71	8.22	356.743	1.62
8.72	7.767	337.083	1.74
8.72	7.982	346.414	1.26
8.73	6.174	267.948	1.38
8.73	6.615	287.087	1.41
8.74	5.049	219.124	1.5
8.81	7.753	336.476	1.21
8.82	7.353	319.116	1.8
8.82	8.005	347.412	1.23
8.82	8.331	361.561	1.44
8.83	4.911	213.135	1.2
8.84	4.986	216.389	1.3
8.91	7.585	329.185	0.93
8.91	8.032	348.584	1.83
8.92	6.346	275.413	1.9
9.01	8.345	362.168	1.45
9.11	7.983	346.458	1.03
9.13	4.781	207.493	1.2
9.21	7.023	304.794	1.46
9.23	4.674	202.849	1.2
9.23	5.978	259.442	1.9
9.31	7.326	317.944	0.95
9.32	6.537	283.702	2.26
9.41	7.431	322.501	1.8
9.41	7.464	323.933	0.95
9.41	7.836	340.078	1.21
9.41	7.907	343.159	1.74
9.43	5.332	231.406	1.5
9.43	5.43	235.659	1.82
9.5	7.974	346.067	1.01
9.51	7.829	339.774	1.6
9.52	6.429	279.015	1.89
9.61	8.18	355.007	1
9.62	7.067	306.704	1.78
9.62	7.094	307.875	1.81
9.63	4.977	215.999	1.5
9.63	4.986	216.389	1.3
9.63	6.019	261.221	1.98
9.7	7.59	329.402	1.16
9.7	8.196	355.702	1.43
9.71	6.5	282.096	1.75
9.72	5.706	247.637	2.4
9.8	7.795	338.298	1.09
9.82	6.017	261.134	1.9
9.82	7.221	313.387	1.28
9.92	5.942	257.879	1.19
9.93	5.207	225.981	1.8
10.01	6.532	283.485	1.8
10.01	7.438	322.805	1.6
10.01	8.235	357.394	0.93
10.03	4.857	210.791	1.2
10.03	5.382	233.576	2.05
10.03	5.4748	237.603	1.235
10.03	5.499	238.653	2.36
10.03	5.5076	239.027	1.268
10.03	5.5595	241.279	1.429
10.1	7.611	330.313	0.96
10.1	7.909	343.246	0.39
10.1	7.976	346.154	0.63
10.11	6.589	285.959	1.6
10.2	8.1	351.535	0.86
10.23	5.4252	235.451	1.232
10.23	5.4702	237.403	1.303
10.23	5.5012	238.749	1.261
10.3	7.036	305.358	1.79
10.3	7.739	335.868	0.56
10.33	5.3233	231.028	1.178
10.39	7.677	333.177	0.97
10.4	6.831	296.461	1.6
10.4	7.415	321.807	1.7
10.4	7.448	323.239	1.59
10.4	7.7	334.176	1.1
10.42	5.43	235.659	2
10.42	5.541	240.476	1.9
10.49	7.806	338.776	1.04
10.52	5.43	235.659	1.83
10.53	5.4753	237.625	1.216
10.61	6.304	273.59	2.01
10.61	6.311	273.894	1.9
10.62	5.4652	237.186	1.271
10.69	7.818	339.297	1.25
10.71	6.546	284.093	1.8
10.72	5.5664	241.579	1.376
10.72	5.6628	245.762	1.38
10.81	7.383	320.418	1.18
10.89	8.366	363.08	1.36
10.9	7.454	323.499	1.5
10.92	4.927	213.829	1.4
10.92	5.382	233.576	2
10.99	7.574	328.707	1.7
11.01	7.048	305.879	1.2
11.02	5.387	233.793	2.23
11.12	5.279	229.106	1.9
11.2	6.293	273.113	1.9
11.28	8.087	350.971	0.96
11.29	7.546	327.492	0.96
11.4	7.195	312.259	1.4
11.49	7.739	335.868	1.07
11.5	6.339	275.109	1.9
11.52	5.405	234.574	1.263
11.6	6.7	290.776	1.47
11.62	5.41	234.791	2.11
11.68	7.963	345.59	1.67
11.72	5.405	234.574	2.4
11.78	7.694	333.915	1.43
11.9	6.212	269.597	1.9
11.92	5.302	230.104	1.57
11.98	8.165	354.356	0.93
12.08	7.799	338.472	1.27
12.08	7.917	343.593	1.3
12.09	6.447	279.796	2
12.3	6.984	303.102	1.81
12.38	7.928	344.071	1.7
12.39	6.613	287	1.7
12.4	5.978	259.442	1.9
12.47	7.9	342.855	1.58
12.48	7.588	329.315	1.5
12.57	7.882	342.074	1.29
12.67	7.864	341.293	1.33
12.71	5.228	226.892	1.55
12.97	7.94	344.591	1.33
12.99	6.667	289.344	1.44
13.07	8.045	349.148	1.21
13.27	7.88	341.987	1.29
13.27	7.917	343.593	1.55
13.47	6.87	298.154	1.8
13.48	6.585	285.785	1.8
13.67	7.861	341.163	1.08
13.86	7.177	311.478	0.92
13.88	6.557	284.57	1.69
13.97	7.7	334.176	0.96
14.06	7.583	329.098	1.1
14.07	7.934	344.331	1.74
14.26	7.871	341.597	1.12
14.56	7.801	338.559	1.08
14.66	7.813	339.08	1.29
14.86	7.686	333.568	1.05
14.95	7.856	340.946	1.36
14.95	7.895	342.638	1.73
15.05	7.845	340.468	1.35
15.05	7.856	340.946	1.2
15.24	7.802	338.602	1.11
15.35	7.514	326.103	1.11
15.35	7.786	337.908	1.29
15.35	7.918	343.637	1.22
15.55	7.441	322.935	0.98
15.65	7.673	333.004	1.18
15.84	7.76	336.779	1.43
15.99	5.345	231.97	2.25
16.19	5.281	229.192	1.49
16.34	7.852	340.772	1.22
16.34	7.98	346.327	1.26
16.75	7.349	318.942	1.6
16.83	7.999	347.152	1.4
16.94	7.886	342.248	1.32
17.18	5.63	244.339	2.08
17.33	7.84	340.251	1.5
17.34	7.346	318.812	1.77
17.67	5.219	226.502	1.38
17.77	5.146	223.333	1.36
18.27	5.021	217.908	1.44
18.44	6.789	294.639	1.73
18.61	7.815	339.166	1.35
18.74	6.737	292.382	2.22
18.74	7.2	312.476	1.56
19.14	7.216	313.17	1.31
19.26	5.901	256.1	1.21
19.31	8.227	357.047	1.35
19.44	7.14	309.872	1.17
19.63	6.518	282.877	2.04
19.65	6.002	260.483	1.15
19.76	5.325	231.102	1.96
19.83	8.088	351.014	2.23
19.85	5.839	253.409	1.03
20.04	5.481	237.872	1.83
20.04	6.612	286.957	2.17
20.14	5.458	236.874	1.18
20.14	5.589	242.559	1.9
20.14	5.993	260.093	1.4
20.15	5.394	234.096	0.78
20.41	7.742	335.998	1.29
20.42	6.954	301.8	1.85
20.43	7.331	318.161	1.29
20.45	5.311	230.494	1.55
20.5	7.732	335.564	1.8
20.53	6.75	292.946	1.84
20.63	7.287	316.252	1.68
20.7	7.918	343.637	1.5
20.72	6.784	294.422	1.86
20.75	5.306	230.277	1.41
20.75	5.55	240.867	2.11
20.75	5.653	245.337	1.14
20.81	6.53	283.398	1.8
21.05	5.419	235.181	1.84
21.12	7.014	304.404	1.55
21.15	5.391	233.966	1.42
21.23	5.632	244.426	0.82
21.42	7.06	306.4	1.28
21.93	5.949	258.183	1.13
22.01	7.179	311.564	1.4
22.11	6.828	296.331	1.86
22.41	6.986	303.188	1.54
22.51	7.092	307.789	0.94
22.62	6.018	261.178	2.14
22.63	6.036	261.959	1.21
22.83	5.212	226.198	1.9
23.43	5.29	229.583	1.36
23.73	5.263	228.411	1.33
23.8	6.215	269.727	1.9
23.96	7.732	335.564	1.2
23.98	7.053	306.096	1.74
23.98	7.282	316.035	1.72
24.03	5.311	230.494	1.85
24.16	8.004	347.369	1
24.16	8.262	358.566	1.38
24.26	7.539	327.188	1.7
24.28	6.587	285.872	1.9
24.29	6.343	275.283	1.9
24.37	7.576	328.794	1.54
24.43	5.616	243.731	1.48
24.46	7.562	328.186	1.68
24.53	5.456	236.787	1.33
24.56	7.728	335.391	0.72
24.56	8.203	356.005	1.25
24.57	7.085	307.485	1.71
24.65	7.891	342.465	0.46
24.68	6.539	283.789	1.8
24.71	5.566	241.561	1.86
24.78	7.232	313.865	1.77
24.87	6.92	300.324	1.82
24.96	7.544	327.405	1.46
25.14	7.895	342.638	0.62
25.16	7.595	329.619	1.77
25.27	6.507	282.4	1.56
25.32	5.518	239.478	2.46
25.35	7.376	320.114	1.7
25.35	7.836	340.078	1.2
25.46	6.937	301.062	1.8
25.47	6.748	292.859	1.74
25.55	7.668	332.787	1.12
25.56	7.03	305.098	1.76
25.56	8.205	356.092	1.19
25.75	7.556	327.926	1.82
25.82	4.936	214.22	1.4
25.85	7.121	309.047	1.8
25.91	5.166	224.201	1.19
26.01	5.41	234.791	2.39
26.09	5.996	260.223	2
26.45	8.067	350.103	1.32
26.47	7.112	308.657	1.7
26.81	5.483	237.959	2.39
27.01	5.579	242.125	2.3
27.16	6.711	291.253	1.8
27.49	5.49	238.263	1.95
27.59	6.039	262.089	1.7
27.83	7.9	342.855	0.57
27.95	7.769	337.17	1.73
28.06	6.419	278.581	2.11
28.1	5.368	232.968	2.22
28.23	8.018	347.977	1.82
28.43	6.842	296.939	1.83
28.43	7.933	344.288	0.7
28.61	7.74	335.911	1
28.7	5.827	252.888	2.03
28.91	7.652	332.092	1.13
29.18	5.4	234.357	1.4
29.36	6.268	272.028	1.6
29.61	7.875	341.77	1.21
29.7	7.308	317.163	0.97
29.72	7.721	335.087	1.4
29.73	7.556	327.926	1.53
29.89	5.352	232.274	1.39
29.99	5.538	240.346	2.12
30.02	7.613	330.4	1.47
30.06	6.068	263.348	1.59
30.08	5.148	223.42	1.36
30.09	5.414	234.964	2.13
30.14	6.58	285.568	1.79
30.37	5.632	244.426	1.69
30.37	5.965	258.878	1.59
30.4	7.521	326.407	1.15
30.88	5.421	235.268	1.8
31.03	6.891	299.065	1.7
31.11	7.756	336.606	1.3
31.22	7.425	322.241	1.6
31.52	7.496	325.322	0.69
31.57	5.173	224.505	1.58
31.76	5.258	228.194	1.83
31.78	7.634	331.311	1.04
32.25	6.173	267.905	1.6
32.52	6.79	294.682	1.7
33	7.597	329.705	1.7
33.07	7.829	339.774	1.24
33.23	6.304	273.59	1.5
33.46	5.419	235.181	1.5
33.67	7.852	340.772	3.1
33.74	5.856	254.147	1
34.55	5.32	230.885	1.92
35.07	7.466	324.02	1.5
35.25	5.345	231.97	2.28
35.31	6.527	283.268	1.7
35.36	7.631	331.181	1.6
35.93	7.916	343.55	1.2
36.37	7.447	323.195	1.7
36.79	6.954	301.8	1.75
36.95	7.597	329.705	1.6
36.97	7.431	322.501	1.5
37.14	7.588	329.315	1.6
37.33	7.618	330.617	1.2
37.36	7.358	319.333	1.4
37.45	7.431	322.501	1.4
37.51	5.947	258.096	1.21
37.53	7.753	336.476	1.22
37.9	5.076	220.295	1.2
37.98	6.509	282.487	2.2
38.21	4.908	213.004	1.1
38.41	4.962	215.348	1.3
38.52	4.907	212.961	1.1
38.53	7.677	333.177	1.52
38.63	5.256	228.107	1.47
38.73	7.923	343.854	1.75
38.79	5.348	232.1	1.5
39.01	5.058	219.514	0.9
39.07	7.136	309.698	1.76
39.25	7.439	322.848	1.75
39.3	7.852	340.772	1.48
39.32	5.325	231.102	1.06
39.37	7.113	308.7	1.9
39.58	7.34	318.552	0.98
39.61	4.901	212.701	0.7
39.91	7.558	328.013	1.38
40.06	6.417	278.494	1.96
40.28	7.67	332.874	0.98
40.3	7.243	314.342	0.97
40.38	5.924	257.098	1.62
40.38	7.532	326.884	1.02
41.02	7.82	339.383	0.74
41.29	7.797	338.385	1.64
41.45	7.161	310.783	1.66
41.48	7.921	343.767	1.31
41.97	7.79	338.081	1.06
42.17	7.67	332.874	1.16
42.72	6.454	280.1	1.46
42.88	8.227	357.047	1.62
43.06	5.94	257.793	1.12
43.69	5.283	229.279	1.73
43.79	5.03	218.299	1.46
43.93	6.27	272.114	1.98
44.1	6.543	283.962	1.83
44.24	5.789	251.239	1.71
44.35	7.703	334.306	1.09
44.65	5.619	243.861	1.57
44.67	5.612	243.558	1.84
44.75	7.776	337.474	1.28
44.84	5.835	253.236	1.57
44.94	7.836	340.078	1.2
45.14	7.894	342.595	1.58
45.24	7.661	332.483	1.06
45.84	6.76	293.38	0.8
45.86	5.224	226.719	1.18
46.17	5.428	235.572	1.85
46.33	7.76	336.779	1.48
46.33	7.96	345.459	1.65
46.43	5.531	240.042	1.28
46.53	7.857	340.989	1.26
46.65	7.114	308.743	1.8
46.81	6.844	297.026	1.94
46.82	7.583	329.098	1.1
46.92	7.76	336.779	0.43
46.95	8.128	352.75	1.29
47.23	5.091	220.946	1.04
47.25	5.749	249.503	0.91
47.42	7.933	344.288	1.6
48.12	5.938	257.706	1.21
48.15	5.897	255.926	1.9
48.19	6.553	284.396	1.62
48.19	7.113	308.7	1.6
48.48	7.356	319.246	0.93
48.51	7.689	333.698	1.35
48.54	7.583	329.098	1.8
48.62	7.369	319.81	1.6
48.65	6.587	285.872	1.7
48.68	6.355	275.803	1.9
48.75	5.478	237.742	1.13
48.76	6.534	283.572	1.8
48.85	5.4039	234.526	1.246
48.91	7.253	314.776	0
48.97	7.121	309.047	1.7
49.14	5.905	256.274	1.01
49.15	5.272	228.802	1.68
49.15	5.483	237.959	1.285
49.19	7.744	336.085	0.89
49.21	8.013	347.76	0.9
49.23	6.224	270.118	2
49.24	7.087	307.572	1.62
49.3	6.112	265.257	1.73
49.35	5.5712	241.787	1.323
49.39	7.767	337.083	1.54
49.41	7.673	333.004	0.58
49.44	5.5145	239.326	1.262
49.45	5.4613	237.017	1.274
49.5	7.79	338.081	1.19
49.51	7.895	342.638	1.49
49.54	5.456	236.787	1.13
49.54	6.507	282.4	1.73
49.57	6.957	301.93	1.88
49.63	5.577	242.039	0.92
49.64	5.345	231.97	1.232
49.64	5.4252	235.451	1.236
49.66	7.124	309.177	0.46
49.69	7.037	305.402	1.83
49.89	6.261	271.724	0.59
49.91	5.784	251.022	0.96
49.91	5.843	253.583	1.03
49.93	6.932	300.845	1.8
49.98	6.75	292.946	1.82
49.98	7.225	313.561	1.22
50	6.045	262.349	0.96
50.03	5.931	257.402	0.96
50.08	6.98	302.928	0.86
50.11	7.613	330.4	1.06
50.19	5.839	253.409	0.96
50.19	6.619	287.261	1.58
50.19	7.216	313.17	1.07
50.21	7.629	331.094	1.42
50.27	7.14	309.872	1.34
50.27	7.335	318.335	1.42
50.29	7.744	336.085	1.06
50.29	7.829	339.774	1.38
50.31	7.638	331.485	1.75
50.38	7.053	306.096	0.97
50.4	7.976	346.154	0.73
50.42	8.035	348.714	1.02
50.44	5.4771	237.703	1.285
50.44	5.4819	237.911	1.291
50.47	7.204	312.649	1.41
50.47	7.331	318.161	1.75
50.5	7.921	343.767	1.27
50.54	5.5822	242.264	1.355
50.57	7.986	346.588	0.88
50.59	7.795	338.298	1.05
50.69	6.732	292.165	2.14
50.82	7.115	308.787	1.72
50.83	5.47	237.395	1.258
50.92	7.758	336.693	1.31
50.97	6.217	269.814	1.9
51.05	7.273	315.644	1.33
51.12	7.025	304.881	1.39
51.14	5.3438	231.918	1.183
51.16	6.849	297.243	1.76
51.28	7.606	330.096	1.38
51.48	7.062	306.487	1.69
51.48	7.921	343.767	1.48
51.49	7.374	320.027	1.8
51.79	7.865	341.336	1.21
51.83	5.313	230.581	1.85
51.91	5.694	247.116	0.69
51.93	5.249	227.804	1.05
51.95	7.136	309.698	1.58
51.97	7.926	343.984	1.66
52.04	7.409	321.546	1.58
52.13	5.46	236.961	2.31
52.35	7.097	308.006	0.86
52.45	6.904	299.63	1.68
52.49	6.195	268.859	1.63
52.57	7.91	343.289	1.59
52.59	5.646	245.033	0.77
52.66	7.068	306.747	0.78
52.66	7.91	343.289	1.6
52.81	7.402	321.242	1.39
53.03	6.451	279.97	1.77
53.06	7.93	344.157	1.32
53.18	6.27	272.114	1.84
53.31	5.499	238.653	1.26
53.42	5.387	233.793	2.23
53.56	7.059	306.356	0.89
53.61	5.084	220.643	1.71
53.75	7.894	342.595	1.35
53.88	7.663	332.57	1
53.99	6.267	271.984	1.91
54.05	6.25	271.246	1.59
54.16	6.491	281.706	1.81
54.28	6.056	262.827	1.72
54.46	7.636	331.398	1.2
54.55	6.247	271.116	1.69
54.55	7.491	325.105	1.05
54.86	6.059	262.957	1.55
54.99	5.626	244.165	1
55.06	7.849	340.642	1.22
55.08	7.054	306.139	1.75
55.44	6.849	297.243	0.78
55.5	5.497	238.567	1.76
55.65	8.074	350.407	0.5
55.66	7.737	335.781	1.6
55.7	6.859	297.677	1.7
55.71	5.446	236.353	1.4
55.79	5.794	251.456	1.63
55.84	8.212	356.396	1.46
55.89	6.242	270.899	1.64
55.97	7.85	340.685	1.45
56	4.706	204.238	1
56.43	7.285	316.165	0.9
56.49	5.318	230.798	1.58
56.69	5.573	241.865	1.42
56.75	7.358	319.333	1.49
56.76	6.21	269.51	1.99
56.77	5.883	255.319	1.78
56.84	7.884	342.161	1.48
56.89	5.226	226.805	1.64
57.12	7.493	325.192	1.13
57.14	7.963	345.59	1.3
57.24	7.879	341.944	1.33
57.29	5.41	234.791	2.04
57.34	7.533	326.928	0.91
57.36	7.721	335.087	1.2
57.4	6.886	298.848	1.7
57.42	6.438	279.405	1.6
57.73	6.378	276.801	1.93
57.9	6.753	293.076	1.73
58.23	6.307	273.72	1
58.36	6.273	272.245	1.6
58.6	7.624	330.877	1.03
58.67	6.789	294.639	1.64
58.8	6.847	297.156	0.75
58.9	8.088	351.014	1.56
59.11	7.588	329.315	1.08
59.16	6.776	294.074	1.5
59.3	7.064	306.573	0.91
59.31	7.464	323.933	0.96
59.59	7.728	335.391	1.2
59.64	6.304	273.59	0.4
59.76	7.829	339.774	1.74
60.07	5.609	243.427	1.07
60.2	7.985	346.544	1.37
60.26	7.742	335.998	1.06
60.36	5.563	241.431	1.35
60.42	8.109	351.926	1.11
60.56	5.52	239.565	1.22
60.62	7.264	315.253	1.58
61.1	7.677	333.177	1.54
62.75	5.483	237.959	1.36
63.92	6.624	287.478	0.7
64.05	7.817	339.253	1.32
64.15	7.882	342.074	1.56
64.34	6.596	286.263	0.92
64.41	7.565	328.317	1.01
64.53	7.707	334.479	0.86
64.63	5.345	231.97	2.28
64.64	7.234	313.951	1.09
64.66	7.868	341.467	1.19
64.76	7.349	318.942	0.98
65.44	7.705	334.393	1.16
65.53	5.462	237.048	2.04
65.68	6.288	272.896	1.94
65.91	7.521	326.407	0.95
66.02	3.961	171.905	0.65
67.01	6.679	289.865	1.6
67.55	7.673	333.004	1.41
67.73	6.791	294.725	0.99
68.92	8.087	350.971	1.35
69.4	6.546	284.093	1.81
69.64	4.961	215.305	1.12
69.8	5.835	253.236	1.53
69.97	7.553	327.796	1.01
70.01	6.849	297.243	0.79
70.46	6.47	280.794	1.8
70.49	5.697	247.246	1.44
70.59	5.859	254.277	2.35
71.93	7.282	316.035	1.55
71.99	6.139	266.429	1.7
72.47	6.139	266.429	1.9
72.58	7.193	312.172	1.66
72.64	7.441	322.935	1.64
72.76	7.91	343.289	1.21
72.94	6.534	283.572	1.8
73.09	7.121	309.047	1.8
73.16	6.578	285.481	1.8
73.24	6.872	298.241	1.03
73.25	7.319	317.64	1.18
73.38	5.612	243.558	1.54
73.39	6.729	292.035	0.91
73.47	6.798	295.029	1.82
73.76	6.876	298.414	1.76
73.88	6.706	291.036	1.76
73.96	7.503	325.626	1.6
73.99	6.56	284.7	1.9
74.04	7.255	314.863	1.04
74.13	6.883	298.718	0.79
74.14	6.821	296.027	0.97
74.24	7.684	333.481	1.14
74.29	8.103	351.665	1.19
74.34	7.466	324.02	1.09
74.48	8.148	353.618	1.28
74.64	7.151	310.349	0.92
74.67	7.852	340.772	1.48
74.81	5.221	226.588	1.07
74.81	5.859	254.277	1.3
74.82	6.729	292.035	0.74
74.83	4.947	214.697	0.5
74.83	6.518	282.877	0.88
74.83	7.114	308.743	0.9
74.87	5.46	236.961	1.4
74.93	5.928	257.272	0.39
75.06	7.491	325.105	1.15
75.06	7.668	332.787	0.98
75.12	5.469	237.351	1.39
75.15	7.629	331.094	0.7
75.25	7.289	316.338	1.26
75.33	7.089	307.658	0.94
75.34	8.141	353.315	1.35
75.38	7.663	332.57	1.42
75.42	6.601	286.48	1.5
75.46	7.094	307.875	0.83
75.54	6.013	260.961	0.7
75.56	8.375	363.47	1.46
75.58	7.204	312.649	1.32
75.66	6.502	282.183	1.8
75.83	5.701	247.42	0.96
75.85	5.935	257.576	1.79
75.94	6.02	261.264	0.83
75.98	7.347	318.856	0.75
76.02	6.907	299.76	1
76.07	7.106	308.396	1.02
76.18	6.927	300.628	1.42
76.3	6.698	290.689	1.6
76.34	7.175	311.391	1.54
76.48	7.689	333.698	1.25
76.55	4.363	189.352	1.13
76.57	6.928	300.671	1.9
76.59	6.504	282.27	1.57
76.69	5.887	255.492	0.89
76.73	7.748	336.259	1.16
76.74	5.905	256.274	1.99
76.81	7.919	343.68	1.5
77.11	7.475	324.411	1.66
77.31	6.463	280.49	0.76
77.51	6.792	294.769	0.68
77.57	7.803	338.646	1.07
77.9	7.878	341.901	1.31
78.03	3.902	169.345	1.03
78.31	6.318	274.198	1.63
78.34	6.502	282.183	1.6
78.4	7.941	344.635	1.45
78.51	7.583	329.098	0.94
78.67	7.79	338.081	1.49
78.68	5.66	245.641	1.49
78.75	7.9	342.855	1.71
78.89	6.079	263.825	1.72
78.94	6.314	274.024	1.49
78.99	6.787	294.552	1.57
79.1	5.591	242.646	1.4
79.1	7.089	307.658	0.8
79.13	6.743	292.642	1.7
79.24	6.635	287.955	1.75
79.65	5.956	258.487	1.44
79.74	7.703	334.306	1.4
79.78	7.452	323.412	0.5
79.87	5.949	258.183	1.32
79.92	7.116	308.83	1.6
80.14	7.797	338.385	1.46
80.39	5.859	254.277	1.34
80.41	7.661	332.483	0.1
80.48	6.808	295.463	0.78
80.57	6.258	271.594	0.73
80.62	4.653	201.937	1
80.71	6.075	263.651	1.5
80.76	6.686	290.169	1.7
80.84	7.618	330.617	1.3
80.93	6.723	291.774	1.6
81.21	6.461	280.404	0.71
81.38	5.008	217.344	0.92
81.48	6.891	299.065	1.48
81.5	6.693	290.472	1.7
81.51	6.129	265.995	1.95
81.69	5.132	222.726	0.95
81.91	5.26	228.281	1.67
81.96	7.636	331.398	1.17
82.03	6.251	271.29	1.4
82.12	6.456	280.187	1.88
82.56	5.969	259.051	0.7
82.59	7.728	335.391	1.36
82.7	5.862	254.407	1.96
82.84	7.427	322.327	1.5
82.95	7.967	345.763	1.07
83.34	5.231	227.022	1.42
83.38	5.761	250.024	1.53
83.4	6.695	290.559	1.52
83.45	7.905	343.072	1.48
83.49	6.243	270.943	2.23
83.69	6.408	278.103	1.5
84.34	6.286	272.809	0.73
84.34	7.94	344.591	1.23
84.65	5.125	222.422	0.62
84.69	7.542	327.318	1.38
84.89	7.604	330.009	1.05
85.03	6.511	282.574	0.83
85.36	7.914	343.463	1.5
85.76	7.898	342.769	1.06
85.82	7.23	313.778	1.02
86.05	7.005	304.013	0.87
86.21	6.789	294.639	1.73
86.52	7.507	325.799	0.89
86.81	5.644	244.946	1.47
87.27	6.525	283.181	1.85
87.34	7.11	308.57	1.52
87.4	6.564	284.874	0.75
87.5	6.7	290.776	1.44
87.55	7.872	341.64	1.16
88.59	6.348	275.499	0.87
88.59	7.615	330.487	1.34
88.69	6.32	274.284	1.56
88.72	6.429	279.015	0.65
88.89	6.227	270.248	0.84
88.94	6.973	302.624	0.77
88.99	7.551	327.709	1.21
89.09	6.656	288.867	1.72
89.26	7.659	332.396	0.86
89.45	6.612	286.957	0.67
89.73	6.47	280.794	1.71
89.97	7.076	307.094	0.95
90.29	6.911	299.933	1.64
90.34	5.456	236.787	1.07
90.49	7.507	325.799	1.5
90.87	6.7	290.776	0.8
91.33	5.467	237.265	1.21
91.46	7.857	340.989	1.17
91.72	5.641	244.816	1.25
92.47	7.808	338.863	0.53
92.48	7.51	325.93	1.05
92.91	6.686	290.169	1.6
92.99	5.958	258.574	0.66
93.13	5.745	249.33	1.33
93.42	5.529	239.955	1.33
93.53	6.364	276.194	1.73
94.33	5.108	221.684	1.2
94.43	8.101	351.579	1.24
94.47	6.454	280.1	1.64
94.89	5.969	259.051	1.56
95.12	5.426	235.485	1.4
95.3	4.111	178.415	0.7
95.37	7.062	306.487	1.75
95.74	5.38	233.489	0.68
96.02	5.699	247.333	0.52
96.25	7.654	332.179	1.07
96.27	6.921	300.367	1.67
96.6	5.857	254.19	1.8
96.67	5.911	256.534	1.78
96.83	7.5	325.496	1.4
97.29	5.3773	233.372	1.254
97.51	4.914	213.265	1.1
97.77	4.837	209.923	0.9
97.91	6.599	286.393	1.7
97.98	5.5067	238.988	1.287
98.01	7.42	322.024	1.74
98.05	6.081	263.912	1.9
98.08	5.1682	224.297	1.19
98.09	6.548	284.179	0.79
98.09	7.829	339.774	1.4
98.16	5.127	222.509	0.9
98.19	5.384	233.662	1.3
98.2	5.3279	231.228	1.185
98.35	7.227	313.648	1.26
98.39	7.188	311.955	1.04
98.48	5.4195	235.203	1.176
98.68	5.55	240.867	1.325
98.68	5.644	244.946	1.14
98.69	6.424	278.798	0.87
98.72	6.95	301.626	1.77
98.73	6.608	286.783	1.6
98.79	7.305	317.033	1.26
98.88	5.4682	237.317	1.275
98.88	5.579	242.125	1.72
98.98	7.546	327.492	1.17
99.06	6.592	286.089	0.96
99.12	6.025	261.481	0.17
99.17	5.515	239.348	0.6
99.18	7.207	312.78	1.03
99.26	7.927	344.027	1.42
99.4	5.911	256.534	0.6
99.43	6.814	295.724	1.5
99.44	7.202	312.563	1.21
99.45	6.53	283.398	0.8
99.53	7.445	323.109	1.02
99.57	5.4613	237.017	1.259
99.6	7.069	306.79	0.62
99.64	6.879	298.545	1.37
99.65	7.136	309.698	1.06
99.71	5.793	251.413	0.71
99.72	6.992	303.449	1.5
99.76	6.117	265.474	0.74
99.76	7.142	309.959	1.26
99.77	6.188	268.556	0.73
99.79	6.697	290.646	0.82
99.83	6.821	296.027	1.32
99.85	7.514	326.103	0.94
99.87	4.951	214.871	0.44
99.87	5.3346	231.519	1.249
99.87	5.614	243.644	1.25
99.89	7.101	308.179	0.4
99.9	7.253	314.776	1.16
99.97	6.495	281.879	1.76
99.97	7	303.796	1.02
100.07	4.8733	211.498	1.006
100.07	5.547	240.737	1.19
100.07	6.426	278.885	1.8
100.08	6.706	291.036	1.23
100.19	5.12	222.205	0.5
100.22	7.354	319.159	1.1
100.24	7.129	309.394	1.34
100.25	7.572	328.62	1
100.27	5.742	249.199	1.65
100.35	5.586	242.429	0.8
100.35	6.332	274.805	0.48
100.35	7.721	335.087	1.01
100.43	8.189	355.398	1.37
100.5	7.255	314.863	1.29
100.52	7.243	314.342	1.15
100.54	6.504	282.27	1.7
100.69	7.537	327.101	0.84
100.79	7.239	314.168	0.77
100.86	5.4333	235.802	1.279
100.89	6.833	296.548	0.73
101	5.265	228.498	0.93
101.09	7.26	315.08	1.62
101.13	7.081	307.311	1.3
101.25	6.936	301.018	1.37
101.25	6.938	301.105	1.37
101.56	3.342	145.041	0.85
101.59	4.645	201.59	0.39
101.6	6.654	288.78	1.71
101.63	8.036	348.758	0.91
101.74	5.842	253.539	1.8
101.79	7.016	304.49	0.95
101.79	7.404	321.329	1.3
101.81	7.218	313.257	1.43
101.86	7.526	326.624	1.14
101.95	6.376	276.715	0.84
101.95	7.689	333.698	1.19
102.15	6.665	289.257	0.61
102.26	5.277	229.019	1.7
102.35	5.378	233.402	1.63
102.38	7.144	310.045	1.7
102.56	6.654	288.78	1.39
102.76	5.715	248.028	1.47
102.81	5.644	244.946	1.5
102.84	7.88	341.987	1.26
102.91	7.266	315.34	1
102.96	5.414	234.964	1.05
102.98	5.74	249.113	0.69
102.99	5.559	241.257	-0.7
103.14	6.587	285.872	0.69
103.21	5.444	236.266	1.72
103.32	5.446	236.353	1.26
103.42	4.611	200.115	0.43
103.43	7.122	309.091	0.76
103.53	6.142	266.559	1.38
103.55	7.027	304.968	0.7
103.74	5.694	247.116	1.91
103.76	6.603	286.566	1.6
103.9	7.696	334.002	1.3
103.98	5.61	243.471	1.41
103.98	5.912	256.577	1.22
104.04	6.838	296.765	1.53
104.21	5.531	240.042	0.8
104.25	5.963	258.791	1.32
104.33	5.571	241.778	1.44
104.44	5.641	244.816	2.07
104.52	6.493	281.792	1.54
104.59	6.751	292.989	1.7
104.66	6.725	291.861	0.9
104.69	6.566	284.961	1.59
104.74	4.501	195.341	0.32
104.86	5.458	236.874	0.65
104.87	4.703	204.107	0.78
105	5.765	250.198	1.48
105	7.523	326.494	1.27
105.03	6.592	286.089	1.49
105.05	5.366	232.881	1.3
105.16	5.678	246.422	-0.2
105.23	5.825	252.802	1.34
105.37	6.047	262.436	1.83
105.41	4.84	210.053	0.82
105.62	6.693	290.472	1.5
105.67	6.53	283.398	1.57
105.73	4.223	183.276	0.25
105.8	7.13	309.438	0.9
105.83	5.648	245.12	1.86
105.92	7.836	340.078	1.5
105.93	5.435	235.876	1.33
105.94	6.058	262.914	1.83
106.12	6.215	269.727	1.4
106.13	5.994	260.136	1.3
106.14	7.443	323.022	0.8
106.21	7.39	320.722	1.62
106.24	6.279	272.505	1.73
106.26	6.394	277.496	0.79
106.26	6.884	298.762	1.7
106.3	5.821	252.628	1.77
106.59	5.814	252.324	1.4
106.6	4.954	215.001	0.44
106.61	6.32	274.284	1.76
106.72	5.722	248.331	1.54
106.82	5.75	249.547	1.78
106.85	6.385	277.105	1.83
106.93	6.571	285.178	1.57
106.96	6.626	287.565	0.75
107.12	6.626	287.565	1.61
107.26	6.879	298.545	1.61
107.31	7.247	314.516	1.2
107.32	6.734	292.252	1.48
107.35	6.64	288.172	1.65
107.39	5.794	251.456	0.65
107.39	7.652	332.092	1.25
107.46	6.576	285.395	1.45
107.55	6.107	265.04	1.2
107.81	6.497	281.966	1.44
108.36	5.727	248.548	1.5
108.57	6.094	264.476	1.4
108.6	5.607	243.341	1.5
108.69	6.725	291.861	1.5
108.73	6.58	285.568	1.51
108.83	7.588	329.315	1.1
109.2	5.465	237.178	1.46
109.27	5.221	226.588	0.52
109.5	5.499	238.653	1.43
109.5	5.559	241.257	1.32
109.7	5.697	247.246	1.71
109.78	6.761	293.423	0.91
110.11	7.581	329.011	1.13
110.19	5.786	251.109	1.8
110.39	5.635	244.556	1.3
110.4	7.076	307.094	1.71
110.73	7.976	346.154	0.87
110.89	5.426	235.485	1.2
112.04	6.654	288.78	1.47
112.04	7.337	318.422	1.02
112.14	7.694	333.915	1.18
112.47	5.219	226.502	1.21
112.54	7.546	327.492	1.37
112.97	5.439	236.049	1.51
113.17	5.322	230.972	1.38
113.27	5.467	237.265	1.05
113.28	6.573	285.264	0.67
113.37	5.088	220.816	0.47
113.39	6.173	267.905	1.5
113.53	6.739	292.469	0.92
113.75	5.283	229.279	1.32
113.77	7.328	318.031	1.21
114.15	6.261	271.724	0.65
114.32	6.537	283.702	0.7
114.39	7.822	339.47	1.12
114.48	8.166	354.4	1.4
114.56	4.772	207.102	1.1
114.72	5.975	259.312	0.68
114.76	5.492	238.35	1.36
114.86	5.26	228.281	0.59
115.02	7.87	341.553	1.41
115.15	5.561	241.344	1.24
115.24	6.75	292.946	1.57
115.51	5.15	223.507	0.68
115.57	7.388	320.635	1.42
115.57	7.719	335	1
116.5	7.755	336.562	1.6
116.53	4.326	187.746	0.52
116.97	7.87	341.553	1.67
117.14	5.368	232.968	1.37
117.32	6.718	291.557	1.6
117.38	6.484	281.402	1.65
118.93	5.006	217.257	1.59
119.02	5.123	222.335	1.22
119.13	5.044	218.907	1.18
119.6	6.56	284.7	1.56
119.7	6.836	296.678	0.59
119.72	4.267	185.185	1.22
120.28	5.726	248.505	0.64
121.51	5.46	236.961	1.37
121.53	7.206	312.736	1.5
121.64	5.607	243.341	0.64
121.64	5.824	252.758	0.66
121.69	6.371	276.498	1.7
122.14	4.698	203.89	0.44
122.35	7.661	332.483	1.04
122.71	6.318	274.198	1.5
122.73	7.298	316.729	0.92
122.91	5.417	235.095	1.26
122.93	5.692	247.029	0.67
122.99	5.501	238.74	1.97
123.24	6.516	282.791	1.29
123.44	7.615	330.487	0.92
123.65	4.239	183.97	0.31
123.77	5.318	230.798	1.11
123.83	6.491	281.706	1.29
123.84	6.543	283.962	1.5
124.51	6.047	262.436	0.6
124.51	7.528	326.711	0.98
124.58	1.32	57.2872	0.24
124.8	5.866	254.581	1.21
124.94	4.636	201.2	0.4
125.11	6.111	265.214	0.61
125.28	4.959	215.218	1.1
125.39	6.072	263.521	0.7
125.51	5.962	258.747	1.75
125.63	6.959	302.017	1.13
125.79	5.826	252.845	1.65
125.83	4.625	200.722	0.55
126.04	5.465	237.178	0.66
126.37	5.557	241.171	1.57
126.41	6.775	294.031	1.56
126.57	1.47	63.7971	0.35
126.98	5.446	236.353	1.5
127.04	6.64	288.172	1.7
127.08	5.334	231.492	0.53
127.09	6.935	300.975	0.93
127.15	6.61	286.87	1.45
127.34	6.47	280.794	1.57
127.46	5.803	251.847	1.56
127.68	5.623	244.035	0.59
127.76	5.57	241.735	1.82
127.97	7.682	333.394	1.2
128.23	6.537	283.702	1.47
128.3	5.098	221.25	0.38
128.92	7.032	305.185	0.91
129.24	6.815	295.767	1.56
129.27	5.43	235.659	1.22
129.41	7.02	304.664	0.81
129.54	5.536	240.259	1.79
129.85	7.606	330.096	1.33
130.12	6.944	301.366	1.3
130.22	7.473	324.324	0.93
130.24	3.95	171.428	1
130.24	5.68	246.509	1.56
130.34	5.639	244.729	1.7
130.44	5.46	236.961	1.71
130.55	6.836	296.678	1.36
130.68	6.686	290.169	1.48
130.78	6.661	289.084	1.5
130.87	7.694	333.915	1.4
131	6.667	289.344	1.12
131.08	5.791	251.326	1.56
131.1	6.028	261.612	1.51
131.33	5.485	238.046	1.77
131.44	6.164	267.514	1.7
131.53	1.93	83.7609	0.43
131.88	7.262	315.167	0.93
132.13	7.48	324.628	1.11
132.49	6.41	278.19	1.43
132.53	7.399	321.112	1.11
132.64	7.172	311.261	1.49
133.22	5.019	217.822	1.66
133.22	6.564	284.874	0.99
134.21	5.299	229.974	0.6
134.77	6.267	271.984	1.4
134.95	4.482	194.516	0.39
135	4.563	198.032	0.42
135.01	7.719	335	1.04
135.03	4.138	179.587	0.43
135.9	5.525	239.782	1.7
136.98	7.611	330.313	1.34
137.1	5.276	228.975	1.3
137.68	5.46	236.961	1.15
137.87	4.583	198.9	0.62
138.1	5.902	256.143	1.48
138.56	5.628	244.252	0.6
138.59	6.631	287.782	0.67
138.6	6.514	282.704	0.66
139.17	4.377	189.959	0.32
139.24	6.798	295.029	1.53
139.5	5.389	233.879	0.54
140.05	6.55	284.266	1.5
140.16	6.178	268.122	1.45
140.21	6.132	266.125	1.4
140.36	5.016	217.691	1.16
140.66	5.584	242.342	1.27
140.74	6.539	283.789	1.47
142.12	7.153	310.436	1.45
142.64	5.568	241.648	1.7
143.33	7.195	312.259	0.89
143.38	4.207	182.581	0.38
143.8	6.963	302.19	0.91
144.07	7.926	343.984	1.24
144.14	5.866	254.581	0.56
144.48	5.492	238.35	1.25
144.51	4.947	214.697	1.18
144.54	5.577	242.039	0.67
144.56	6.624	287.478	1.51
145.05	7.484	324.801	1.38
145.09	7.438	322.805	1.15
145.22	5.382	233.576	1.37
145.25	6.867	298.024	1.41
145.33	4.473	194.126	0.51
145.79	4.749	206.104	0.34
146.3	5.688	246.856	1.7
146.71	7.424	322.197	1.4
146.94	7.001	303.839	1.5
147.05	6.429	279.015	1.5
147.31	5.3392	231.718	1.308
147.31	5.414	234.964	1.14
147.47	4.414	191.565	0.4
147.51	5.0954	221.137	1.187
147.67	6.647	288.476	1.5
147.76	5.01	217.431	0.56
147.76	6.199	269.033	1.6
147.8	6.947	301.496	1.52
147.86	6.174	267.948	0.87
147.9	4.8779	211.698	1.073
147.9	4.9938	216.728	1.179
147.92	7.797	338.385	1.67
147.94	4.099	177.894	0.24
148.05	6.484	281.402	1.05
148.1	4.6839	203.279	1.045
148.13	5.196	225.503	0.62
148.18	6.318	274.198	1.5
148.2	4.9065	212.939	1.107
148.3	4.7682	206.937	1.042
148.3	4.8944	212.414	1.092
148.3	5.274	228.889	1.63
148.4	6.479	281.185	1.37
148.52	4.6846	203.309	0.946
148.53	4.411	191.435	0.43
148.71	5.882	255.275	0.75
148.81	7.402	321.242	1.6
148.85	5.802	251.803	0.73
148.91	6.373	276.584	1.6
149.06	7.746	336.172	0.99
149.07	5.107	221.641	0.53
149.15	5.03	218.299	0.48
149.16	6.527	283.268	1.17
149.19	4.257	184.751	-0.5
149.19	5.4057	234.604	1.21
149.22	5.332	231.406	1.17
149.28	6.98	302.928	1.35
149.35	4.896	212.484	0.5
149.36	5.889	255.579	1.39
149.39	5.57	241.735	1.67
149.41	7.558	328.013	0.95
149.54	4.526	196.426	0.44
149.55	6.615	287.087	0.92
149.69	5.435	235.876	1.52
149.77	7.257	314.95	0.71
149.83	6.755	293.163	0.87
149.94	4.904	212.831	0.38
149.98	7.464	323.933	0.55
150.01	6.849	297.243	0.77
150.07	4.542	197.12	0.4
150.33	5.841	253.496	0.72
150.34	5.529	239.955	0.63
150.48	4.9111	213.139	1.132
150.49	5.173	224.505	0.17
150.5	5.414	234.964	1.5
150.58	5.185	225.026	0.37
150.89	4.923	213.655	1.67
151.06	4.744	205.887	0.46
151.08	1.48	64.2311	0.26
151.18	3.734	162.053	0.94
151.19	7.843	340.382	0.93
151.32	4.393	190.654	0.4
151.58	7.425	322.241	0.97
151.77	4.879	211.746	1.18
151.82	7.033	305.228	0.99
151.82	7.491	325.105	1.16
151.91	5.371	233.098	0.41
152.12	6.458	280.273	0.77
152.17	5.481	237.872	1.84
152.21	5.669	246.031	0.48
152.32	5.713	247.941	0.55
152.61	6.826	296.244	0.93
152.89	6.963	302.19	0.89
153.09	5.956	258.487	1.25
153.63	6.017	261.134	0.5
153.75	5.031	218.342	0.41
153.76	1.42	61.6272	0.26
153.78	4.409	191.348	0.43
153.81	5.561	241.344	1.3
153.85	6.652	288.693	1.5
153.9	7.148	310.219	1.01
154.05	4.232	183.666	0.4
154.1	7.716	334.87	1.2
154.14	6.376	276.715	1.37
154.2	5.182	224.896	0.56
154.22	5.986	259.789	1.22
154.23	4.294	186.357	0.34
154.3	4.48	194.429	0.54
154.3	4.831	209.663	0.76
154.45	6.785	294.465	1.48
154.47	6.705	290.993	1.5
154.48	7.069	306.79	1.1
154.57	6.681	289.952	1.49
154.77	6.332	274.805	1.45
154.85	5.971	259.138	1.62
154.87	6.514	282.704	1.48
154.94	5.605	243.254	1.23
154.95	6.679	289.865	1.56
154.96	5.931	257.402	1.21
154.98	7.009	304.187	1.22
155	5.8	251.717	1.24
155.12	6.245	271.029	0.7
155.12	7.526	326.624	1.3
155.17	4.657	202.111	0.38
155.24	5.116	222.031	1.6
155.32	5.676	246.335	1.53
155.39	5.911	256.534	1.51
155.54	5.667	245.944	1.56
155.73	4.156	180.368	0.3
155.79	6.626	287.565	1.08
155.81	6.875	298.371	1.6
155.82	7.385	320.505	1.59
155.86	4.823	209.315	0.5
155.94	5.547	240.737	1.64
156.03	6.803	295.246	1.63
156.14	7.167	311.044	1.1
156.16	6.412	278.277	1.5
156.49	6.079	263.825	1.2
156.71	6.675	289.691	1.5
156.93	5.176	224.635	1.36
157.04	6.608	286.783	1.43
157.22	6.966	302.32	1.38
157.41	5.384	233.662	1.36
157.56	7.191	312.085	1.37
157.66	4.747	206.017	0.4
157.76	6.621	287.348	1.46
157.92	4.857	210.791	0.69
157.93	6.089	264.259	1.3
158.37	5.789	251.239	1.38
158.41	6.281	272.592	1.59
158.42	5.345	231.97	1.34
158.45	4.409	191.348	0.36
158.53	5.334	231.492	1.37
158.64	4.368	189.569	0.39
158.85	7.634	331.311	0.99
158.93	5.125	222.422	0.48
159.05	5.734	248.852	0.9
159.13	5.701	247.42	0.79
159.27	8.005	347.412	1.27
159.33	6.16	267.34	1.4
159.37	4.723	204.975	0.35
159.66	6.429	279.015	0.81
159.71	5.338	231.666	1.24
159.85	6.991	303.405	1.01
159.97	4.088	177.417	0.44
160.49	5.733	248.809	0.67
160.7	5.026	218.125	1.34
160.72	5.831	253.062	0.57
161.02	4.756	206.408	0.44
162.21	6.527	283.268	0.83
162.37	7.992	346.848	1.02
162.62	6.617	287.174	0.63
162.8	4.847	210.357	0.4
163.13	4.193	181.974	0.34
163.16	6.803	295.246	0.75
163.48	5.033	218.429	1.62
164.28	4.939	214.35	0.57
164.48	4.198	182.191	0.5
164.61	6.569	285.091	1.2
164.95	4.92	213.525	1.2
165.27	5.476	237.655	1.54
165.3	6.585	285.785	1.45
165.34	5.41	234.791	1.56
165.82	4.262	184.968	0.37
166	6.056	262.827	1.46
166.1	6.603	286.566	1.47
166.45	6.594	286.176	1.41
166.57	6.116	265.431	0.75
166.6	7.362	319.507	1.4
166.86	7.136	309.698	1.17
167.89	5.64	244.773	0.61
168.03	6.148	266.82	1.5
168.37	5.52	239.565	1.28
168.9	5.028	218.212	1.19
169.24	5.026	218.125	1.41
169.33	2.853	123.819	0.76
169.63	0.601	26.083	0.03
170.08	7.537	327.101	0.9
170.18	4.457	193.431	0.38
171.26	7.028	305.011	1.02
171.34	5.451	236.57	1.49
171.37	4.315	187.268	0.44
171.86	4.4	190.957	0.37
172.46	5.162	224.028	0.52
172.63	5.334	231.492	1.18
172.95	4.744	205.887	0.32
173.09	6.385	277.105	1.23
173.17	6.141	266.516	0.75
173.34	5.996	260.223	1.39
173.37	6.479	281.185	1.27
173.38	6.998	303.709	1.32
173.4	7.579	328.924	0.89
173.78	4.648	201.72	0.48
174	5.318	230.798	1.19
174.06	7.4	321.156	1.47
174.1	5.169	224.332	1.35
174.1	5.394	234.096	1.61
174.18	6.097	264.606	0.59
174.44	4.2	182.278	0.44
174.56	4.067	176.505	0.4
174.56	6.748	292.859	1.3
174.59	5.058	219.514	1.49
175.19	5.439	236.049	1.61
175.29	5.336	231.579	1.2
175.41	4.129	179.196	0.44
175.52	5.071	220.078	0.58
175.76	5.104	221.511	1.06
175.84	6.679	289.865	1.6
175.94	6.668	289.387	1.5
176.08	5.32	230.885	1.57
176.08	5.98	259.529	1.45
176.45	4.515	195.948	0.39
178.11	6.711	291.253	1.5
178.15	5.796	251.543	1.57
178.15	6.475	281.011	1.42
178.38	4.216	182.972	0.3
178.45	4.34	188.353	0.34
178.47	5.327	231.189	0.46
178.7	5.738	249.026	0.65
179.35	5.1	221.337	1.31
179.44	6.718	291.557	1.56
179.67	6.773	293.944	1.5
179.7	6.663	289.17	1.54
179.81	6.452	280.013	1.64
180.25	6.09	264.302	1
180.58	4.14	179.674	0.36
180.9	4.6	199.637	0.41
181.34	5.015	217.648	1.26
181.54	5.518	239.478	1.46
181.85	6.924	300.498	1.48
182.58	4.521	196.209	0.45
182.58	6.99	303.362	1.01
182.72	5.389	233.879	1.35
182.73	5.192	225.33	1.22
182.8	6.27	272.114	0.7
182.91	6.394	277.496	0.64
183.04	6.773	293.944	1.49
183.18	5.6	243.037	0.78
183.38	4.347	188.657	0.38
184.17	6.79	294.682	0.99
184.56	6.631	287.782	1.4
184.91	5.15	223.507	1.18
185.28	5.619	243.861	1.47
185.43	6.488	281.575	1.39
185.49	4.069	176.592	0.46
186	5.378	233.402	1.32
186.1	4.793	208.013	1.12
187.04	4.79	207.883	0.47
187.18	4.241	184.057	0.35
187.3	4.347	188.657	0.32
187.35	5.614	243.644	0.53
187.52	6.157	267.21	1.44
187.81	5.373	233.185	1.3
187.84	6.638	288.085	0.67
188.04	5.711	247.854	1.39
188.52	4.039	175.29	0.33
188.52	4.285	185.967	0.32
188.53	5.072	220.122	1.42
188.84	6.201	269.12	1.41
188.95	5.166	224.201	1.23
189.17	6.81	295.55	1.43
189.49	6.617	287.174	1.42
189.87	5.29	229.583	1.14
190.3	4.878	211.702	0.45
190.65	7.595	329.619	0.84
190.76	4.909	213.048	1.4
191.19	5.391	233.966	0.59
191.31	4.971	215.739	0.61
191.99	7.269	315.47	1.15
193.15	5.536	240.259	1.29
193.78	5.4	234.357	1.22
194.13	6.761	293.423	1.23
194.3	4.303	186.748	0.3
194.45	6.472	280.881	0.91
194.61	4.678	203.022	0.47
194.66	6.73	292.078	1.47
194.77	6.977	302.798	1.49
195.32	4.319	187.442	0.4
195.44	6.683	290.038	0.85
195.58	4.921	213.569	0.8
195.64	4.457	193.431	0.43
195.95	4.651	201.851	0.47
196.05	6.764	293.554	1.22
196.05	7.069	306.79	1.64
196.22	4.593	199.334	0.6
196.27	4.873	211.485	0.8
196.43	6.185	268.425	1
196.43	6.475	281.011	1.5
196.47	6.396	277.583	1.4
196.59	4.982	216.216	1.4
196.69	4.225	183.363	0.5
196.73	6.215	269.727	1.5
196.83	5.888	255.536	1.35
196.84	6.892	299.109	1.21
196.86	6.885	298.805	1.06
196.87	4.855	210.704	0.8
196.91	6.997	303.666	1.4
197.39	4.994	216.737	0.8
197.41	4.795	208.1	1.077
197.51	5.061	219.644	1.13
197.68	5.648	245.12	0.82
197.72	4.29	186.183	0.4
197.81	4.9977	216.897	1.255
197.82	4.193	181.974	0.34
197.88	4.42	191.825	0.43
197.92	5.224	226.719	0.7
197.99	5.942	257.879	0.98
198.01	5.1746	224.575	1.278
198.01	5.208	226.024	1.21
198.11	4.57	198.335	0.46
198.24	5.258	228.194	1.5
198.32	4.884	211.963	0.53
198.34	4.6206	200.531	0.988
198.42	4.489	194.82	0.56
198.42	4.817	209.055	0.5
198.52	5.648	245.12	0.58
198.58	6.805	295.333	1.16
198.71	4.453	193.258	0.47
198.82	5.862	254.407	0.56
198.9	6.332	274.805	1.5
199.05	5.139	223.03	0.95
199.07	5.55	240.867	1.19
199.2	5.13	222.639	1.26
199.22	6.527	283.268	1.35
199.27	6.123	265.735	1.33
199.32	6.704	290.95	0.66
199.42	6.422	278.711	1.1
199.43	4.806	208.578	0.47
199.45	6.078	263.782	0.53
199.5	4.861	210.965	1.44
199.51	5.084	220.643	0.55
199.59	4.967	215.565	1.5
199.64	4.967	215.565	0.5
199.66	6.613	287	1.4
199.8	4.524	196.339	0.35
199.89	5.256	228.107	1.4
199.9	4.975	215.912	0.4
199.91	5.706	247.637	0.37
199.93	7.002	303.883	1.22
199.96	5.497	238.567	0.53
199.97	5.058	219.514	0.26
200.01	6.468	280.707	1.12
200.05	7.388	320.635	0.41
200.06	4.478	194.343	0.25
200.12	6.117	265.474	0.78
200.15	5.281	229.192	0.26
200.27	4.186	181.67	0.34
200.29	5.198	225.59	1.49
200.33	5.176	224.635	0.44
200.42	6.787	294.552	1
200.44	6.695	290.559	0.82
200.52	6.812	295.637	1.08
200.6	6.929	300.715	1.31
200.82	6.629	287.695	1.5
200.84	7.629	331.094	0.88
200.91	5.005	217.214	1.3
200.91	6.98	302.928	1
200.95	6.371	276.498	0.71
200.99	7.237	314.082	1.03
201.12	4.313	187.182	0.36
201.13	7.478	324.541	1.24
201.14	5.281	229.192	1.15
201.19	6.968	302.407	1.34
201.21	4.262	184.968	0.35
201.25	5.678	246.422	0.9
201.25	6.424	278.798	1.13
201.25	7.108	308.483	0.95
201.28	4.317	187.355	0.36
201.31	4.8	208.317	0.1
201.35	4.016	174.292	0.36
201.42	5.017	217.735	1.39
201.45	5.084	220.643	0.5
201.45	6.856	297.546	1.3
201.48	0.406	17.6202	-0.12
201.48	0.87	37.7575	0.1
201.58	5.308	230.364	0.57
201.68	4.372	189.742	0.33
201.76	4.921	213.569	0.44
201.77	5.794	251.456	0.76
201.97	6.199	269.033	0.82
202	6.419	278.581	1.5
202.04	5.727	248.548	1.38
202.05	6.658	288.953	1.27
202.17	5.552	240.954	0.58
202.3	4.359	189.178	0.4
202.37	5	216.997	0.48
202.39	5.41	234.791	1.27
202.55	6.846	297.112	0.85
202.57	4.349	188.744	1.27
202.62	4.866	211.182	0.46
202.66	4.851	210.531	0.33
202.93	7.285	316.165	1.11
202.95	4.041	175.377	-0.9
203.15	5.989	259.919	1.3
203.16	5.538	240.346	1.46
203.27	4.524	196.339	0.37
203.31	5.557	241.171	0.53
203.33	4.873	211.485	0.92
203.33	6.002	260.483	1.21
203.46	4.056	176.028	1.76
203.47	6.702	290.863	1.59
203.49	6.419	278.581	0.78
203.53	4.707	204.281	0.82
203.56	5.332	231.406	1.55
203.56	5.973	259.225	1.45
203.7	5.69	246.943	1.39
203.71	7.355	319.203	0.93
203.72	4.661	202.285	0.39
203.79	6.677	289.778	0.9
203.82	4.111	178.415	0.35
203.83	4.095	177.721	0.35
203.83	4.409	191.348	0.43
203.89	5.375	233.272	1.4
203.9	4.159	180.498	0.33
204	4.182	181.496	0.49
204	5.882	255.275	1.22
204.06	6.652	288.693	1.22
204.08	5.977	259.398	1.23
204.08	6.123	265.735	1.3
204.13	4.198	182.191	0.22
204.15	4.425	192.042	0.37
204.15	4.598	199.551	0.42
204.16	6.794	294.856	1.51
204.33	4.815	208.968	0.78
204.35	5.534	240.172	1.2
204.37	5.368	232.968	1.13
204.45	5.019	217.822	1.31
204.5	6.555	284.483	1.5
204.55	5.107	221.641	1.62
204.56	6.661	289.084	1.5
204.68	5.465	237.178	1.44
204.72	6.399	277.713	1.04
204.73	5.951	258.27	1.21
204.88	7.266	315.34	1.3
204.91	5.869	254.711	0.97
204.91	6.481	281.272	1.4
204.93	6.902	299.543	1.48
204.99	5.905	256.274	0.8
205.04	6.997	303.666	1.5
205.05	5.169	224.332	1.42
205.09	5.285	229.366	0.8
205.14	4.255	184.665	0.41
205.16	7.452	323.412	1.3
205.24	6.99	303.362	1.5
205.29	5.495	238.48	0.8
205.3	6.438	279.405	1.15
205.31	4.053	175.898	0.3
205.35	4.636	201.2	1.23
205.54	5.352	232.274	1.3
205.69	6.477	281.098	1.51
205.71	5.38	233.489	0.5
205.83	4.372	189.742	0.39
205.86	6.566	284.961	1.47
205.9	4.14	179.674	0.41
206.04	5.136	222.899	0.55
206.13	6.373	276.584	1.58
206.27	5.909	256.447	1.47
206.3	5.272	228.802	1.51
206.37	6.67	289.474	1.48
206.4	6.713	291.34	1.34
206.55	6.573	285.264	1.45
206.56	5.964	258.834	1.3
206.67	4.936	214.22	1.4
206.96	6.596	286.263	1.5
206.99	4.641	201.417	0.4
207.04	6.313	273.981	0.9
207.23	6.468	280.707	1.41
207.24	5.844	253.626	1.38
207.27	5.843	253.583	1.3
207.28	6.1	264.736	1.3
207.33	4.797	208.187	1.36
207.42	6.33	274.718	0.82
207.61	4.365	189.438	0.4
207.63	5.054	219.341	1.01
207.74	5.15	223.507	1.22
207.83	5.001	217.04	1.42
207.86	6.399	277.713	1.42
207.94	5.835	253.236	0.6
208.2	4.402	191.044	0.35
208.22	3.955	171.645	0.27
208.26	6.118	265.518	1.49
208.42	4.42	191.825	0.44
208.42	5.04	218.733	1.2
208.48	6.693	290.472	0.93
209.22	4.891	212.267	1.12
209.83	7.229	313.734	1.3
210.03	4.781	207.493	1.36
210.75	4.375	189.872	0.32
211	4.682	203.196	1.04
211.26	6.12	265.604	1.32
211.47	4.34	188.353	0.39
211.5	4.409	191.348	1.02
211.76	4.124	178.979	0.37
212.19	4.866	211.182	1.26
212.26	3.934	170.733	0.35
212.31	6.364	276.194	0.7
212.7	4.921	213.569	0.43
212.85	4.209	182.668	0.44
213.58	0.08	3.47195	-0.1
213.68	5.077	220.339	1.29
213.79	6.426	278.885	1.4
213.88	6.44	279.492	1.37
214.08	5.559	241.257	1.16
214.11	6.543	283.962	1.41
214.32	5.88	255.189	0.9
214.37	5.102	221.424	1.15
214.55	4.657	202.111	1.16
214.76	4.324	187.659	0.32
214.9	6.362	276.107	1.3
215.37	5.212	226.198	1.5
215.44	6.776	294.074	1.5
216.11	4.37	189.655	0.12
216.41	5.83	253.019	0.76
216.57	6.546	284.093	1.49
216.85	6.647	288.476	1.39
217.42	5.315	230.668	1.25
218.36	5.423	235.355	1.22
218.62	5.456	236.787	1.28
218.65	4.368	189.569	0.44
218.74	6.413	278.32	1.63
219.14	0.252	10.9367	0.05
220.23	6.169	267.731	1.36
220.42	4.092	177.59	0.44
220.43	7.128	309.351	1.5
220.52	4.56	197.901	0.4
223.64	4.078	176.983	0.43
224.05	5.901	256.1	1.22
224.18	4.216	182.972	0.27
224.25	6.523	283.094	1.65
224.27	6.408	278.103	1.19
224.3	4.639	201.33	0.42
224.54	5.734	248.852	1.42
224.79	4.336	188.18	0.4
225.17	4.016	174.292	0.4
225.46	7.386	320.548	1.21
225.48	4.807	208.621	0.67
225.53	4.921	213.569	0.38
226.12	6.592	286.089	1.42
226.22	5.897	255.926	1.42
227.17	5.058	219.514	1.56
227.56	4.664	202.415	1.34
227.87	6.234	270.552	1.37
228.46	4.781	207.493	1.29
228.99	6.509	282.487	1.4
229.16	4.76	206.581	0.37
229.55	6.619	287.261	1.49
230.94	4.758	206.494	1.28
231.24	5.169	224.332	1.36
231.44	6.95	301.626	1.34
231.94	6.234	270.552	0.61
232.14	4.246	184.274	0.4
232.43	4.404	191.131	0.45
232.43	4.783	207.579	0.63
232.47	4.26	184.882	0.31
232.51	4.418	191.739	0.81
232.78	6.812	295.637	1.11
233.12	5.809	252.107	0.73
233.52	4.497	195.167	0.36
233.52	4.898	212.57	1.25
233.82	5.017	217.735	1.14
233.85	4.992	216.65	0.45
233.92	5.476	237.655	1.4
234.41	4.951	214.871	1.17
234.84	6.523	283.094	1.3
235.7	4.873	211.485	1.19
235.78	4.088	177.417	0.4
235.96	6.049	262.523	1.37
235.96	7.372	319.941	0.47
237.14	6.921	300.367	1.39
237.36	6.576	285.395	0.61
237.58	3.92	170.126	0.35
237.77	3.996	173.424	0.44
238.5	5.449	236.483	1.4
238.65	4.189	181.8	0.36
238.87	5.998	260.31	1.42
239.08	6.757	293.25	1.36
239.24	6.373	276.584	1.44
239.55	4.292	186.27	0.41
239.9	7.696	334.002	0.84
241.8	4.032	174.986	0.39
242.64	2.06	89.4028	0.55
242.65	4.469	193.952	0.37
242.73	4.57	198.335	0.35
243.24	0.457	19.8335	0.01
243.29	5.393	234.053	1.28
243.44	5.433	235.789	1.26
243.5	4.728	205.192	0.45
243.7	4.03	174.9	0.37
243.81	5.75	249.547	0.74
244.58	4.042	175.42	0.33
244.91	6.778	294.161	1.5
246.11	7.746	336.172	0.99
246.38	4.986	216.389	0.7
246.41	4.9263	213.799	1.259
246.43	5.571	241.778	1.3
246.51	5.0376	218.629	1.109
246.57	4.143	179.804	0.49
246.74	6.521	283.008	1.5
246.81	4.8652	211.147	1.078
246.82	6.442	279.579	1.5
246.87	4.577	198.639	0.59
246.91	4.93	213.959	1.18
247.39	5.841	253.496	1.23
247.47	5.994	260.136	1.4
247.5	4.8583	210.847	1.09
247.52	4.232	183.666	0.54
247.52	4.76	206.581	0.42
247.56	4.182	181.496	0.43
247.57	6.856	297.546	1.62
247.58	6.135	266.255	1.16
247.6	4.9844	216.32	1.236
247.7	4.8118	208.829	1.208
247.79	7.175	311.391	0.76
247.87	5.603	243.167	1.35
247.9	5.198	225.59	1.44
247.96	4.227	183.449	0.33
248	4.8595	210.899	1.088
248.09	6.061	263.044	1.15
248.1	4.6731	202.81	1.147
248.11	4.863	211.051	1.4
248.24	6.036	261.959	1.03
248.26	4.795	208.1	1.28
248.3	2.529	109.757	0.72
248.35	4.326	187.746	0.43
248.4	4.987	216.433	1.19
248.49	4.6504	201.825	1.058
248.49	4.659	202.198	1.31
248.83	4.5809	198.808	1.002
248.89	4.7883	207.809	1.058
248.96	4.797	208.187	0.93
249	4.301	186.661	0.46
249.05	4.159	180.498	0.35
249.19	4.175	181.193	0.3
249.29	5.24	227.413	1.34
249.37	4.262	184.968	0.45
249.64	4.136	179.5	0.42
249.68	0.374	16.2314	0.08
249.72	4.802	208.404	1.4
249.72	5.881	255.232	1.39
249.78	4.016	174.292	1.2
249.88	5.008	217.344	1.44
249.88	7.289	316.338	0.88
250.09	7.032	305.185	1.13
250.14	4.407	191.261	0.31
250.18	4.978	216.042	1.19
250.43	4.49	194.863	0.39
250.49	4.432	192.346	0.48
250.58	4.7642	206.764	1.094
250.58	4.884	211.963	1.24
250.63	4.179	181.366	0.26
250.87	4.753	206.277	1.25
251.02	4.283	185.88	0.49
251.06	6.335	274.935	1.07
251.12	4.31	187.051	0.38
251.12	4.513	195.862	0.44
251.17	0.865	37.5405	0.12
251.27	4.928	213.872	1.49
251.32	4.579	198.726	0.44
251.41	4.363	189.352	0.41
251.52	4.855	210.704	0.53
251.6	4.205	182.495	0.5
251.72	4.678	203.022	0.45
251.81	4.296	186.444	0.25
251.86	5.748	249.46	1.43
252.08	5.942	257.879	1.22
252.16	4.591	199.247	-0.2
252.21	5.462	237.048	0.71
252.29	4.641	201.417	0.37
252.59	6.576	285.395	0.84
252.67	6.635	287.955	1.53
252.72	4.032	174.986	-1
252.9	5.127	222.509	0.6
252.99	5.41	234.791	1.1
253.1	4.161	180.585	0.2
253.25	5.178	224.722	1.43
253.34	5.944	257.966	1.21
253.36	4.106	178.198	0.28
253.39	3.984	172.903	0.31
253.56	6.776	294.074	1.54
253.61	6.442	279.579	1.4
253.68	4.099	177.894	0.51
253.71	5.951	258.27	1.24
253.85	4.536	196.86	0.6
253.88	5.178	224.722	0.87
253.9	4.198	182.191	0.33
253.9	5.742	249.199	1.2
254.15	3.723	161.576	0.95
254.16	3.921	170.169	0.3
254.2	4.916	213.352	0.6
254.21	6.24	270.812	1.3
254.26	6.596	286.263	1.53
254.29	5.322	230.972	0.82
254.46	4.375	189.872	0.4
254.46	5.081	220.512	1.27
254.55	6.608	286.783	1.5
254.56	4.609	200.028	0.5
254.58	4.342	188.44	0.39
254.61	4.246	184.274	0.43
254.7	5.194	225.417	0.8
254.85	4.731	205.323	0.48
255	6.385	277.105	1.49
255.02	5.994	260.136	1.24
255.11	4.283	185.88	0.4
[truncated: 5,502 more rows]

## Sheet: South Atlantic
Water depth (m)	O2 ml/l	O2 umol/kg	d13C of DIC
0.6	4.595	199.42	1.76
0.8	4.485	194.646	1.68
1.09	4.542	197.12	1.9
1.19	4.544	197.207	1.9
1.39	4.558	197.815	1.88
1.99	4.822	209.272	1.8
1.99	5.104	221.511	1.77
2.19	4.785	207.666	1.44
2.59	4.687	203.413	1.68
2.88	4.689	203.5	1.66
2.98	4.498	195.211	1.84
2.98	4.712	204.498	1.76
2.98	4.808	208.664	1.7
2.98	4.87	211.355	1.8
2.98	5.258	228.194	1.69
3.18	4.698	203.89	1.56
3.18	4.783	207.579	1.79
3.48	4.687	203.413	1.71
3.78	4.68	203.109	1.59
3.98	4.698	203.89	1.71
4.08	4.723	204.975	1.67
4.28	4.707	204.281	1.73
4.67	4.877	211.659	1.47
4.77	4.492	194.95	1.23
4.77	4.521	196.209	1.52
4.77	4.717	204.715	1.59
4.87	4.4	190.957	1.21
4.87	4.459	193.518	1.55
5.26	6.84	296.852	1.84
5.26	6.943	301.322	1.81
5.27	4.519	196.122	1.55
5.27	5.063	219.731	1.47
5.37	4.517	196.035	1.49
5.45	8.29	359.781	1.61
5.47	4.799	208.274	1.68
5.55	7.542	327.318	1.58
5.56	4.941	214.437	1.2
5.56	5.586	242.429	1.89
5.57	4.466	193.822	1.57
5.57	4.542	197.12	1.59
5.66	4.944	214.567	1.5
5.85	8.093	351.231	1.39
5.96	5.125	222.422	1.68
6.06	4.776	207.276	1.33
6.06	4.829	209.576	1.62
8.84	5.325	231.102	1.43
9.14	5.171	224.418	1.47
9.44	5.423	235.355	1.4
9.53	5.251	227.89	1.49
9.61	8.18	355.007	1
9.7	8.196	355.702	1.43
9.73	5.256	228.107	1.51
9.83	5.265	228.498	1.45
9.83	5.428	235.572	1.41
9.93	5.208	226.024	1.51
10.01	8.235	357.394	0.93
10.03	5.309	230.408	1.39
10.03	5.407	234.661	1.29
10.03	5.407	234.661	1.49
10.03	5.513	239.261	1.22
10.1	7.611	330.313	0.96
10.1	7.909	343.246	0.39
10.1	7.976	346.154	0.63
10.2	8.1	351.535	0.86
10.23	5.228	226.892	1.5
10.23	5.403	234.487	1.46
10.3	7.739	335.868	0.56
10.33	5.238	227.326	1.46
10.33	5.338	231.666	1.46
10.33	5.355	232.404	1.47
10.33	5.364	232.794	1.45
10.4	7.7	334.176	1.1
10.43	5.256	228.107	1.48
10.43	5.384	233.662	1.42
11.22	4.941	214.437	1.47
18.89	4.498	195.211	1.86
19.39	4.455	193.344	1.68
24.16	8.262	358.566	1.38
24.46	4.602	199.724	1.51
24.56	7.728	335.391	0.72
24.56	8.203	356.005	1.25
24.65	7.891	342.465	0.46
24.71	5.566	241.561	1.86
24.78	7.232	313.865	1.77
25.14	7.895	342.638	0.62
25.55	7.668	332.787	1.12
25.56	8.205	356.092	1.19
26.45	8.067	350.103	1.32
27.83	7.9	342.855	0.57
28.84	4.641	201.417	1.95
29.63	4.531	196.643	1.57
29.73	7.556	327.926	1.53
29.93	4.597	199.507	1.52
30.08	5.148	223.42	1.36
30.33	4.742	205.8	1.51
30.62	4.565	198.118	1.62
31.13	4.583	198.9	1.37
39.18	4.815	208.968	1.22
39.25	7.439	322.848	1.75
39.77	5.006	217.257	1.51
39.95	4.946	214.654	1.5
40.05	5.869	254.711	1.57
42.76	4.84	210.053	1.69
43.69	5.283	229.279	1.73
43.75	4.418	191.739	1.53
44.25	4.324	187.659	1.55
44.65	5.619	243.861	1.57
44.67	5.612	243.558	1.84
47.97	5.417	235.095	1.4
48.66	5.288	229.496	1.48
48.72	4.498	195.211	1.83
49.06	5.458	236.874	1.47
49.3	6.112	265.257	1.73
49.36	5.469	237.351	1.47
49.41	7.673	333.004	0.58
49.51	7.895	342.638	1.49
49.55	5.32	230.885	1.51
49.66	5.439	236.049	1.45
49.66	7.124	309.177	0.46
49.75	5.405	234.574	1.48
49.75	5.433	235.789	1.44
49.75	5.492	238.35	1.16
49.89	6.261	271.724	0.59
49.95	5.421	235.268	1.3
49.95	5.566	241.561	1.4
49.98	6.75	292.946	1.82
50.08	6.98	302.928	0.86
50.11	7.613	330.4	1.06
50.15	5.21	226.111	1.48
50.35	5.32	230.885	1.49
50.35	5.536	240.259	1.42
50.4	7.976	346.154	0.73
50.42	8.035	348.714	1.02
50.45	5.407	234.661	1.51
50.45	5.506	238.957	1.4
50.45	5.534	240.172	1.47
50.5	7.921	343.767	1.27
50.65	4.905	212.874	1.47
50.84	5.359	232.577	1.49
51.54	5.29	229.583	1.44
53.63	5.12	222.205	1.64
59.26	2.782	120.737	0.41
59.26	3.856	167.348	0.97
59.86	2.587	112.274	0.61
59.96	2.896	125.685	0.73
60.05	5.079	220.426	1.51
60.21	5.662	245.727	1.43
60.36	5.563	241.431	1.35
61.6	4.999	216.954	1.94
64.63	4.537	196.903	1.82
66.9	3.128	135.753	0.77
68.61	3.929	170.516	1.4
72.54	4.909	213.048	1.79
72.64	7.441	322.935	1.64
73.47	6.798	295.029	1.82
73.76	6.876	298.414	1.76
73.88	6.706	291.036	1.76
74.67	3.05	132.368	0.44
74.74	5.309	230.408	1.47
74.82	6.729	292.035	0.74
74.93	5.928	257.272	0.39
75.06	7.491	325.105	1.15
75.12	5.469	237.351	1.39
75.15	7.629	331.094	0.7
75.98	7.347	318.856	0.75
76.07	7.106	308.396	1.02
76.56	3.613	156.802	1.25
79.02	4.163	180.672	1.06
79.34	2.07	89.8368	0.51
79.35	3.124	135.58	0.41
83.34	5.231	227.022	1.42
84.52	3.39	147.124	1.03
91.72	5.641	244.816	1.25
97.21	5.458	236.874	1.35
98.01	7.42	322.024	1.74
98.1	5.267	228.585	1.38
98.2	5.357	232.491	1.48
98.33	5.233	227.109	1.12
98.6	5.41	234.791	1.49
98.63	3.895	169.041	1.19
98.72	6.95	301.626	1.77
98.79	7.305	317.033	1.26
98.8	5.467	237.265	1.2
99.1	5.465	237.178	1.48
99.11	5.24	227.413	1.41
99.2	5.309	230.408	1.2
99.21	4.721	204.889	1.34
99.27	5.272	228.802	1.27
99.3	5.515	239.348	1.4
99.3	5.563	241.431	1.45
99.38	4.613	200.202	0.93
99.43	6.814	295.724	1.5
99.45	6.53	283.398	0.8
99.52	2.431	105.504	0.52
99.59	5.318	230.798	1.36
99.6	7.069	306.79	0.62
99.62	3.271	141.959	0.75
99.76	6.117	265.474	0.74
99.79	5.596	242.863	1.46
99.87	4.951	214.871	0.44
99.89	7.101	308.179	0.4
99.9	5.318	230.798	1.19
99.9	7.253	314.776	1.16
99.91	1.91	82.8929	0.41
99.92	3.326	144.346	0.75
100.01	3.47	150.596	1.11
100.19	5.403	234.487	1.46
100.35	6.332	274.805	0.48
100.39	5.306	230.277	1.35
100.42	2.844	123.428	0.86
100.49	5.394	234.096	1.43
100.6	1.16	50.3433	0.21
100.69	7.537	327.101	0.84
100.78	5.341	231.796	1
100.79	5.079	220.426	1.03
100.79	7.239	314.168	0.77
101.28	5.125	222.422	1.72
101.38	5.433	235.789	1.46
102	3.204	139.052	0.94
102.17	5.297	229.887	1.48
102.26	5.277	229.019	1.7
102.4	2.919	126.683	0.99
103.21	5.444	236.266	1.72
103.39	4.781	207.493	1.72
109.57	2.756	119.609	0.64
118.91	5.017	217.735	1.14
123.24	6.516	282.791	1.29
123.28	3.353	145.518	1
123.77	5.318	230.798	1.11
123.83	6.491	281.706	1.29
126.26	2.568	111.45	0.74
131	6.667	289.344	1.12
137.11	4.944	214.567	1.63
146.15	5.332	231.406	1.32
147.44	5.203	225.807	1.25
147.73	5.334	231.492	1.39
147.73	5.343	231.883	1.44
148.05	6.484	281.402	1.05
148.12	2.17	94.1767	0.65
148.47	1.87	81.1569	0.34
148.71	5.882	255.275	0.75
148.72	3.188	138.357	0.71
148.73	5.095	221.12	1.25
148.83	5.118	222.118	1.11
148.83	5.295	229.8	1.32
148.95	4.54	197.033	1.14
148.96	1.51	65.5331	0.27
149.02	1.94	84.1949	0.07
149.02	2.11	91.5728	0.48
149.02	5.07	220.035	1.27
149.12	3.101	134.582	0.4
149.16	6.527	283.268	1.17
149.22	2.993	129.894	0.75
149.22	3.725	161.663	1.07
149.22	5.125	222.422	1.29
149.22	5.332	231.406	1.17
149.26	5.079	220.426	1.08
149.36	5.889	255.579	1.39
149.54	4.526	196.426	0.44
149.62	5.139	223.03	1.28
149.72	5.18	224.809	1.24
149.82	5.332	231.406	1.39
149.98	7.464	323.933	0.55
150.02	4.978	216.042	1.06
150.02	5.182	224.896	0.99
150.12	5.033	218.429	1.06
150.22	5.109	221.728	1.09
150.33	5.038	218.646	1.32
150.34	5.529	239.955	0.63
150.42	4.902	212.744	1.18
150.58	5.185	225.026	0.37
150.89	4.923	213.655	1.67
151.32	4.393	190.654	0.4
151.77	4.879	211.746	1.18
159.13	5.701	247.42	0.79
173.09	6.385	277.105	1.23
173.37	6.479	281.185	1.27
173.47	2.791	121.128	0.62
175.76	5.104	221.511	1.06
181.91	3.468	150.509	0.88
183.89	2.346	101.815	0.69
191.31	4.971	215.739	0.61
195.3	1.92	83.3269	0.46
197.45	4.42	191.825	0.85
197.68	5.648	245.12	0.82
197.99	5.942	257.879	0.98
198.21	3.484	151.204	0.95
198.35	4.902	212.744	1.07
198.41	2.839	123.211	0.64
198.42	4.817	209.055	0.5
198.51	2.527	109.67	0.27
198.6	1.68	72.911	0.38
198.68	4.737	205.583	1.35
199.04	4.962	215.348	1.24
199.04	5.017	217.735	1.11
199.14	4.935	214.176	1.23
199.3	1.93	83.7609	0.39
199.45	6.078	263.782	0.53
199.5	4.861	210.965	1.44
199.64	4.967	215.565	0.5
199.8	2.908	126.206	0.71
199.8	4.524	196.339	0.35
199.87	2.846	123.515	0.78
199.97	5.058	219.514	0.26
200	0.923	40.0577	0.09
200.05	7.388	320.635	0.41
200.06	4.478	194.343	0.25
200.17	3.02	131.066	0.82
200.33	5.176	224.635	0.44
200.44	6.695	290.559	0.82
200.45	1.17	50.7773	0.19
200.53	5.045	218.95	1.11
200.54	4.909	213.048	1.47
201.12	4.313	187.182	0.36
201.21	4.262	184.968	0.35
201.42	5.017	217.735	1.39
201.76	4.921	213.569	0.44
203.33	4.873	211.485	0.92
203.75	2.74	118.914	0.73
208.57	1.44	62.4952	0.36
218.97	1.69	73.345	0.13
220.52	4.56	197.901	0.4
222.95	1.7	73.779	0.38
230.6	2.449	106.285	0.59
235.96	7.372	319.941	0.47
246.34	4.186	181.67	0.82
246.56	4.964	215.435	1.22
246.76	1.82	78.9869	0.46
247.35	4.891	212.267	1.2
247.39	5.841	253.496	1.23
247.55	5.006	217.257	1.05
247.58	1.8	78.119	0.08
247.58	6.135	266.255	1.16
247.85	4.96	215.261	1.16
248.09	6.061	263.044	1.15
248.11	4.863	211.051	1.4
248.19	4.783	207.579	1.13
248.24	6.036	261.959	1.03
248.25	0.615	26.6906	0.06
248.57	4.939	214.35	1.21
248.64	4.992	216.65	1.14
248.67	0.927	40.2313	0.18
248.75	4.902	212.744	1.08
248.94	4.87	211.355	1.17
248.96	4.797	208.187	0.93
249	4.301	186.661	0.46
249.14	5.065	219.818	0.96
249.24	4.879	211.746	1.06
249.24	4.912	213.178	1.19
249.34	4.99	216.563	1.19
249.35	4.721	204.889	1.02
249.47	2.07	89.8368	0.59
249.54	4.985	216.346	1.03
250.04	4.873	211.485	1.03
250.33	4.896	212.484	1.15
250.33	4.967	215.565	1.11
250.93	4.941	214.437	1.14
251.02	4.283	185.88	0.49
251.03	4.976	215.955	1.17
253.88	5.178	224.722	0.87
266.12	5.313	230.581	0.9
268.35	1.2	52.0793	0.36
269.32	2.465	106.98	0.7
273.51	1.9	82.4589	0.59
283.64	4.928	213.872	1.29
296.62	4.992	216.65	1.13
297.35	5.001	217.04	1.2
297.44	1.92	83.3269	-0.03
297.54	2.21	95.9127	0.63
297.64	4.974	215.869	1.14
297.7	3.925	170.343	0.79
297.83	1.23	53.3813	0.34
297.87	4.941	214.437	1.2
298.04	4.935	214.176	1.05
298.15	4.347	188.657	0.86
298.15	4.868	211.268	1.05
298.28	4.776	207.276	1.12
298.34	4.964	215.435	1.18
298.35	4.565	198.118	0.99
298.4	2.701	117.222	0.74
298.54	4.905	212.874	1.15
298.58	0.714	30.9872	0.09
298.58	5.148	223.42	1.38
298.69	4.925	213.742	1.39
298.73	1.96	85.0629	0.46
298.73	4.955	215.044	1.17
298.75	4.817	209.055	1.37
298.83	5.226	226.805	0.95
298.94	4.873	211.485	1.15
299.03	4.983	216.259	1.02
299.04	4.889	212.18	1.11
299.16	0.714	30.9872	0.21
299.23	4.886	212.05	1.19
299.23	4.905	212.874	1.12
299.28	1.41	61.1932	0.35
299.33	4.928	213.872	1.09
299.43	4.9	212.657	1.19
299.87	4.544	197.207	0.43
299.89	4.703	204.107	0.48
300.04	5.283	229.279	0.37
300.09	2.823	122.517	0.7
300.21	4.51	195.731	0.28
300.75	4.319	187.442	0.36
300.77	4.283	185.88	0.33
300.85	4.388	190.437	0.28
301.47	4.294	186.357	0.35
305.18	5.917	256.794	0.53
321.63	5.054	219.341	1.21
328.72	1.14	49.4753	0.25
346.01	5.749	249.503	1.05
346.51	4.641	201.417	0.72
347.18	1.81	78.5529	0.14
347.25	5.49	238.263	0.88
347.27	3.911	169.735	0.84
347.27	4.997	216.867	1.42
347.45	1.51	65.5331	0.35
347.57	1.48	64.2311	0.4
347.78	2.486	107.891	0.65
347.84	1.28	55.5513	0.47
347.92	5.738	249.026	1.02
347.94	2.818	122.3	0.76
348.01	3.952	171.514	0.34
348.06	1.24	53.8153	0.37
348.14	5.359	232.577	1.39
348.38	1.72	74.647	0.44
361.91	4.987	216.433	1.3
368.62	2.14	92.8748	0.6
395.85	4.134	179.413	0.39
396.08	5.299	229.974	1.25
396.35	4.193	181.974	0.89
396.49	4.863	211.051	1.16
396.5	4.831	209.663	1.15
396.55	5.529	239.955	0.74
396.62	2.02	87.6668	0.21
396.83	4.976	215.955	1.38
396.89	4.847	210.357	1.09
396.89	4.854	210.661	1.12
396.92	2.05	88.9688	0.54
396.99	4.797	208.187	1
397.17	2.736	118.741	0.7
397.29	4.847	210.357	1.14
397.39	4.863	211.051	1.15
397.39	4.866	211.182	1.17
397.45	4.664	202.415	1.1
397.58	1.38	59.8912	0.38
397.59	4.907	212.961	1.12
397.71	0.939	40.7521	0.24
397.82	0.705	30.5966	0.23
397.88	4.9	212.657	1.16
397.89	4.948	214.74	1
397.99	4.739	205.67	1.05
398.16	4.005	173.815	1.06
398.37	2.375	103.074	0.56
398.48	4.87	211.355	1.21
398.5	4.721	204.889	1.09
398.55	0.847	36.7593	0.24
398.68	4.884	211.963	1.34
398.88	4.861	210.965	1.19
398.98	4.774	207.189	1.07
399.05	4.551	197.511	1.14
399.29	4.776	207.276	1.14
399.4	2.571	111.58	0.65
399.49	4.659	202.198	1.04
399.49	4.675	202.892	0.51
399.77	4.831	209.663	1.1
399.89	4.599	199.594	0.41
400.14	4.691	203.587	0.25
400.38	4.868	211.268	0.39
400.45	4.379	190.046	0.4
400.47	4.354	188.961	0.32
405.23	5.878	255.102	0.64
440.22	3.959	171.818	0.54
441.15	5.235	227.196	1.2
445.95	5.361	232.664	1.15
446.02	4.992	216.65	0.82
446.75	4.517	196.035	1.04
446.76	1.7	73.779	0.53
446.8	2.642	114.661	0.7
446.9	4.964	215.435	1.09
446.93	1.8	78.119	0.31
447	1.13	49.0413	0.36
447.17	5.309	230.408	0.92
448.03	2.456	106.589	0.57
494.04	4.691	203.587	1.27
494.71	4.714	204.585	1.07
495.07	4.042	175.42	0.41
495.43	4.214	182.885	0.47
495.59	5.302	230.104	0.95
495.73	4.641	201.417	1.04
495.78	1.68	72.911	0.46
495.78	5.557	241.171	1.22
495.9	4.696	203.804	1.07
495.99	4.806	208.578	1.15
496.14	4.776	207.276	1.11
496.2	4.783	207.579	1.12
496.2	4.806	208.578	1.17
496.29	4.535	196.816	1.03
496.36	2.924	126.9	0.72
496.5	1.54	66.8351	0.38
496.55	2.314	100.426	0.3
496.58	4.156	180.368	0.95
496.6	2.66	115.442	0.7
496.64	3.608	156.585	0.79
496.65	3.075	133.453	0.73
496.69	4.703	204.107	1.11
496.69	4.73	205.279	1.11
496.74	5.042	218.82	1.3
496.85	3.365	146.039	0.46
496.9	4.336	188.18	0.98
497.09	4.788	207.796	1.12
497.1	4.657	202.111	1.06
497.24	2.88	124.99	0.68
497.29	4.799	208.274	1.06
497.3	4.817	209.055	1.15
497.38	4.682	203.196	1.09
497.88	4.696	203.804	1.1
498.1	4.347	188.657	1
498.18	4.781	207.493	1.16
498.35	4.609	200.028	1.11
499.58	4.691	203.587	0.38
499.63	4.65	201.807	0.41
499.88	4.57	198.335	0.26
500.08	4.801	208.361	0.16
500.56	4.632	201.026	0.46
500.72	4.478	194.343	0.33
504.54	5.731	248.722	0.34
509.47	5.554	241.04	1.26
541.27	2.04	88.5348	0.54
543.55	4.57	198.335	0.71
544.02	4.967	215.565	0.77
545.14	1.88	81.5909	0.49
545.65	4.742	205.8	1.04
545.66	2.853	123.819	0.71
546.04	2.2	95.4787	0.56
546.59	1.33	57.7212	0.33
547.26	1.17	50.7773	0.31
547.78	2.864	124.296	0.74
548.24	3.92	170.126	0.6
573.81	5.394	234.096	1.22
593.4	3.982	172.816	0.54
593.87	4.767	206.885	1.05
594.06	4.597	199.507	1.05
594.26	4.62	200.505	1.06
594.39	4.363	189.352	1
594.49	4.758	206.494	1.02
594.53	3.968	172.209	0.44
594.55	5.403	234.487	1.11
594.67	4.331	187.963	0.52
594.86	4.524	196.339	1.04
594.96	3.314	143.826	0.75
595.05	4.955	215.044	1.12
595.34	3.08	133.67	0.42
595.45	4.71	204.411	1.07
595.46	4.469	193.952	1
595.53	6.144	266.646	0.93
595.57	4.985	216.346	1.14
595.64	4.813	208.881	1.13
595.65	4.616	200.332	1.01
595.74	5.396	234.183	1.31
595.75	4.879	211.746	1.14
595.76	4.253	184.578	0.98
595.78	2.862	124.209	0.63
595.8	4.815	208.968	1.15
595.84	4.675	202.892	1.07
595.94	4.861	210.965	1.11
595.95	4.712	204.498	1.25
596.14	4.84	210.053	1.15
596.24	2.981	129.374	0.79
596.34	4.909	213.048	1.15
597.3	4.205	182.495	1.1
597.43	4.822	209.272	1.02
597.45	3.897	169.128	0.88
597.56	2.674	116.05	0.69
600.03	4.717	204.715	0.49
600.09	4.643	201.503	0.45
600.11	4.51	195.731	-0.45
600.11	4.7	203.977	0.4
600.13	4.797	208.187	0.49
600.18	4.478	194.343	-0.33
600.33	4.402	191.044	0.33
639.12	4.134	179.413	0.46
643.31	4.209	182.668	0.63
643.36	4.756	206.408	0.79
644.16	2.952	128.115	0.67
644.4	2.414	104.766	0.55
644.58	1.8	78.119	0.42
645.06	2.07	89.8368	0.68
645.12	3.787	164.354	0.81
645.3	2.474	107.37	0.54
645.41	3.277	142.22	0.73
645.45	1.96	85.0629	0.62
645.61	2.802	121.605	0.33
653.96	5.355	232.404	1.16
692.37	3.977	172.599	0.42
692.82	4.375	189.872	0.68
693.17	5.047	219.037	1.13
693.26	4.735	205.496	1.03
693.6	4.565	198.118	0.93
693.64	5.481	237.872	1.1
693.76	4.918	213.438	1.08
693.93	4.375	189.872	0.95
693.96	5.164	224.115	1.18
693.99	3.264	141.656	0.71
694.06	4.599	199.594	1.06
694.08	4.675	202.892	1.02
694.09	4.953	214.957	1.21
694.26	4.928	213.872	1.1
694.45	5.837	253.322	0.76
694.48	3.3	143.218	0.77
694.63	4.845	210.27	1.2
694.76	4.799	208.274	1.05
694.77	2.11	91.5728	0.51
694.78	5.013	217.561	1.09
694.82	4.93	213.959	1.15
694.83	2.373	102.987	0.57
694.86	4.85	210.487	1.08
694.94	4.817	209.055	1.22
694.94	5.153	223.637	1.17
695.1	2.848	123.602	0.71
695.45	5.086	220.729	1.1
695.47	3.362	145.909	0.46
695.75	5.247	227.717	1.15
695.84	5.095	221.12	1.11
695.92	2.497	108.368	0.59
696.34	5.052	219.254	1.1
696.53	4.2	182.278	0.9
696.64	5.111	221.814	1.12
696.68	5.628	244.252	1.26
696.86	4.586	199.03	0.98
696.93	4.643	201.503	1.03
697.95	3.459	150.119	0.74
700.47	4.749	206.104	0.23
732.09	5.717	248.114	1.17
742.35	3.307	143.522	0.75
742.72	4.069	176.592	0.62
742.87	5.226	226.805	1.04
742.94	5.557	241.171	1.1
743.74	4.235	183.797	0.58
743.96	2.6	112.838	0.59
744.12	4.792	207.97	0.99
744.21	2.906	126.119	0.64
744.65	3.075	133.453	0.75
744.92	3.234	140.354	0.71
744.93	2.465	106.98	0.59
745.03	3.358	145.735	0.75
750.06	4.62	200.505	0.41
754.96	4.648	201.72	0.38
789.65	4.464	193.735	0.49
791.35	5.593	242.733	0.54
791.54	4.969	215.652	1.06
791.71	4.01	174.032	0.52
792	4.285	185.967	0.68
792.37	4.375	189.872	0.84
792.93	4.586	199.03	1.08
792.93	4.946	214.654	1.06
793.06	4.723	204.975	0.99
793.06	5.299	229.974	1.2
793.11	5.141	223.116	1.11
793.12	5.1	221.337	1.08
793.35	5.198	225.59	1.06
793.4	5.146	223.333	1.1
793.42	5.238	227.326	1.12
793.42	5.254	228.021	1.11
793.51	5.15	223.507	1.1
793.61	5.715	248.028	1.25
793.62	5.217	226.415	1.1
793.64	4.462	193.648	0.93
793.64	4.921	213.569	1.06
793.89	5.224	226.719	1.22
793.92	5.215	226.328	1.13
793.99	3.376	146.516	0.68
794.08	3.833	166.35	0.76
794.11	5.123	222.335	1.03
794.27	3.45	149.728	0.47
794.46	3.241	140.658	0.61
794.53	4.797	208.187	1.02
794.61	4.636	201.2	1.02
794.88	2.77	120.216	0.6
795.4	4.847	210.357	1.04
795.56	4.264	185.055	0.87
796.05	3.688	160.057	0.77
796.19	5.139	223.03	1.1
799.7	4.705	204.194	0.36
799.92	4.629	200.896	0.47
799.96	4.641	201.417	0.41
800.27	4.774	207.189	0.47
800.36	4.728	205.192	0.39
800.38	4.817	209.055	0.28
811.19	5.892	255.709	1.15
831.64	5.155	223.724	1.13
840.9	4.347	188.657	0.49
841.96	4.884	211.963	1
842.31	3.413	148.122	0.74
842.58	2.823	122.517	0.56
843.48	3.128	135.753	0.46
843.52	2.977	129.2	0.64
844.26	2.922	126.813	0.62
844.59	3.369	146.213	0.74
845.39	3.259	141.439	0.74
865.83	5.382	233.576	0.9
890.08	4.15	180.108	0.53
890.5	5.621	243.948	1.18
890.59	4.898	212.57	0.9
890.95	4.476	194.256	1.04
891.17	4.664	202.415	0.98
891.39	5.194	225.417	1.13
891.64	4.859	210.878	0.98
891.68	4.556	197.728	0.89
891.79	4.235	183.797	0.75
891.79	5.231	227.022	1.17
892.12	5.208	226.024	1.12
892.14	5.219	226.502	1.13
892.23	5.678	246.422	1.07
892.27	4.868	211.268	0.98
892.43	5.164	224.115	1.03
892.46	5.242	227.5	1.05
892.53	4.73	205.279	0.96
892.53	5.18	224.809	1.06
892.63	5.116	222.031	1.05
892.66	3.069	133.193	0.54
892.77	3.186	138.271	0.69
892.9	3.05	132.368	0.65
892.92	3.199	138.835	0.75
893.01	3.564	154.676	0.71
893.01	5.086	220.729	0.93
893.32	3.443	149.424	0.79
893.32	4.893	212.353	1.01
893.32	5.04	218.733	1
893.52	5.033	218.429	1
893.52	5.079	220.426	0.96
893.56	4.296	186.444	0.79
893.71	5.231	227.022	1.03
894.31	4.994	216.737	0.92
900.88	5.279	229.106	1.11
940.38	4.418	191.739	0.49
940.48	5.116	222.031	1.02
941.3	4.235	183.797	0.73
942.52	3.424	148.6	0.49
942.69	3.287	142.654	0.69
988.67	5.24	227.413	1.11
989.05	3.879	168.346	0.69
989.33	5.054	219.341	0.99
989.38	4.57	198.335	0.51
989.54	4.143	179.804	0.56
989.64	5.049	219.124	0.86
989.87	3.998	173.511	0.62
989.96	4.358	189.135	0.79
990	4.037	175.203	0.69
990.12	4.565	198.118	0.84
990.22	4.694	203.717	0.86
990.31	5.46	236.961	1.09
990.42	3.938	170.907	0.75
990.53	4.212	182.798	0.52
990.83	4.462	193.648	0.81
990.9	4.014	174.205	0.54
990.94	5.008	217.344	0.55
991.01	4.997	216.867	0.96
991.09	3.282	142.437	0.66
991.13	3.649	158.364	0.72
991.22	3.482	151.117	0.7
991.59	5.008	217.344	0.99
991.6	4.778	207.362	0.95
991.6	5.091	220.946	1.03
991.62	3.493	151.594	0.74
991.63	4.983	216.259	0.95
991.65	4.145	179.891	0.73
991.9	4.638	201.286	1.05
991.95	4.707	204.281	0.9
991.99	4.778	207.362	0.89
992.02	3.351	145.431	0.72
992.16	3.312	143.739	0.73
992.17	4.948	214.74	0.9
992.18	5.075	220.252	1.02
992.28	4.859	210.878	0.92
992.49	4.896	212.484	0.86
992.71	3.569	154.893	0.38
992.82	5.022	217.952	1
993.87	4.806	208.578	0.9
994.17	4.939	214.35	0.96
994.47	4.317	187.355	0.76
999.62	4.671	202.719	0.19
999.81	4.762	206.668	0.47
999.9	4.733	205.409	0.44
1000.23	4.71	204.411	0.42
1000.33	4.735	205.496	0.31
1000.36	4.788	207.796	0.39
1000.83	4.918	213.438	0.24
1001.6	4.808	208.664	0.38
1034.67	3.913	169.822	0.73
1039.56	4.574	198.509	0.9
1087.89	4.333	188.05	0.51
1087.95	4.498	195.211	0.75
1088.39	4.609	200.028	0.5
1088.68	4.719	204.802	0.88
1088.98	4.831	209.663	0.91
1089.76	4.593	199.334	0.86
1089.89	3.537	153.504	0.68
1090.27	4.758	206.494	0.84
1090.96	3.58	155.37	0.37
1091.46	3.753	162.878	0.79
1091.65	3.665	159.059	0.72
1091.74	5.421	235.268	0.9
1091.91	3.608	156.585	0.74
1092.13	4.159	180.498	0.85
1137.33	4.508	195.645	0.52
1138.89	4.085	177.287	0.77
1140.6	4.026	174.726	0.77
1141.2	4.586	199.03	0.9
1185	4.434	192.433	0.45
1185.25	4.746	205.974	0.88
1185.86	4.645	201.59	0.46
1185.94	4.039	175.29	0.48
1186.26	4.095	177.721	0.55
1186.48	4.505	195.514	0.78
1186.49	4.648	201.72	0.73
1187.08	4.319	187.442	0.56
1187.32	4.4	190.957	0.69
1187.52	4.505	195.514	0.77
1188.11	4.459	193.518	0.74
1188.31	4.271	185.359	0.69
1188.51	4.464	193.735	0.77
1188.54	4.455	193.344	0.77
1188.6	4.567	198.205	0.81
1188.69	4.462	193.648	0.72
1188.79	4.563	198.032	0.77
1188.79	4.951	214.871	0.89
1188.88	4.526	196.426	0.76
1188.9	4.393	190.654	0.76
1188.9	4.478	194.343	0.75
1189	4.37	189.655	0.69
1189.12	4.301	186.661	0.67
1189.24	4.253	184.578	0.4
1189.25	4.342	188.44	0.74
1189.28	3.801	164.961	0.75
1189.37	3.851	167.131	0.73
1189.47	4.418	191.739	0.74
1189.81	4.108	178.285	0.7
1189.97	3.824	165.959	0.51
1190.27	3.886	168.65	0.79
1190.45	3.906	169.518	0.75
1190.53	4.101	177.981	0.67
1190.58	4.512	195.818	0.78
1190.77	4.352	188.874	0.77
1236.21	4.12	178.806	0.53
1237.97	4.212	182.798	0.86
1239.1	4.2	182.278	0.83
1239.38	5.024	218.039	0.95
1239.5	4.471	194.039	0.51
1249.82	4.946	214.654	0.46
1249.91	4.999	216.954	0.29
1250.14	4.852	210.574	0.43
1250.58	4.925	213.742	0.41
1251.11	4.772	207.102	0.32
1283.69	4.668	202.588	0.46
1284.16	4.4	190.957	0.6
1284.22	4.379	190.046	0.7
1285.02	4.496	195.124	0.55
1285.41	4.212	182.798	0.62
1286.68	4.459	193.518	0.81
1287.73	4.232	183.666	0.71
1287.79	4.198	182.191	0.77
1288.68	4.127	179.109	0.71
1288.91	4.186	181.67	0.8
1289.27	4.005	173.815	0.73
1313.09	5.29	229.583	1.05
1332.03	4.57	198.335	0.48
1339.09	5.389	233.879	0.97
1379.81	4.358	189.135	0.61
1382.56	4.882	211.876	0.81
1382.63	4.395	190.74	0.7
1383.34	4.264	185.055	0.51
1383.66	4.207	182.581	0.58
1384.13	4.416	191.652	0.66
1384.58	4.877	211.659	0.93
1384.77	4.308	186.965	0.75
1385.03	4.54	197.033	0.89
1385.6	4.333	188.05	0.66
1386.38	4.315	187.268	0.61
1386.43	4.212	182.798	0.67
1386.6	4.627	200.809	0.86
1386.8	4.276	185.576	0.63
1387.19	4.358	189.135	0.58
1387.23	4.349	188.744	0.81
1387.25	5.026	218.125	0.93
1387.26	4.533	196.73	0.73
1387.35	4.884	211.963	0.93
1387.48	4.572	198.422	0.55
1387.64	4.896	212.484	0.66
1387.73	4.999	216.954	0.92
1387.79	4.223	183.276	0.67
1387.8	4.352	188.874	0.75
1423.36	4.358	189.135	0.67
1434.69	4.48	194.429	0.84
1439.04	5.664	245.814	1.09
1439.05	5.522	239.652	0.95
1481.2	4.186	181.67	0.35
1481.32	4.322	187.572	0.59
1481.38	4.593	199.334	0.57
1481.38	4.737	205.583	0.45
1482.99	4.127	179.109	0.59
1483.32	4.156	180.368	0.64
1484.59	4.14	179.674	0.65
1485.42	4.687	203.413	0.88
1485.48	4.597	199.507	0.81
1485.56	4.597	199.507	0.88
1485.7	4.606	199.898	0.83
1485.83	4.244	184.187	0.66
1487.36	4.792	207.97	0.91
1497.21	5.226	226.805	0.89
1499.84	4.948	214.74	0.61
1500.11	4.907	212.961	0.43
1500.28	4.999	216.954	0.47
1500.29	4.99	216.563	0.52
1500.93	5.013	217.561	0.54
1531.24	4.425	192.042	0.6
1532.74	4.625	200.722	0.48
1535.68	5.238	227.326	0.97
1537.68	5.671	246.118	0.99
1564.22	5.8	251.717	1.12
1578.85	4.287	186.053	0.57
1579.82	4.404	191.131	0.62
1580.31	4.4	190.957	0.63
1581.01	4.521	196.209	0.57
1581.02	5.513	239.261	0.93
1581.11	4.524	196.339	0.61
1581.76	4.207	182.581	0.65
1582.15	4.43	192.259	0.6
1582.28	4.375	189.872	0.68
1582.61	4.485	194.646	0.72
1582.68	4.503	195.428	0.69
1582.91	4.45	193.127	0.67
1582.94	4.469	193.952	0.7
1582.94	4.48	194.429	0.69
1583.22	4.453	193.258	0.67
1583.22	4.808	208.664	0.83
1583.23	4.179	181.366	0.66
1583.43	4.48	194.429	0.7
1583.48	4.551	197.511	0.7
1583.63	4.478	194.343	0.7
1583.68	4.558	197.815	0.75
1583.73	4.473	194.126	0.67
1583.83	4.443	192.824	0.68
1583.93	4.37	189.655	0.7
1584.02	4.434	192.433	0.68
1584.05	4.733	205.409	0.89
1584.14	5.364	232.794	1.06
1584.42	4.464	193.735	0.62
1584.76	4.622	200.592	0.81
1584.82	5.203	225.807	0.73
1584.83	5.355	232.404	1.14
1585.12	5.302	230.104	0.98
1585.33	4.983	216.259	0.6
1586.28	4.455	193.344	0.68
1586.34	4.73	205.279	0.9
1587.43	5.742	249.199	1.04
1677.32	4.333	188.05	0.57
1677.71	4.604	199.811	0.7
1679.11	4.51	195.731	0.63
1679.4	4.212	182.798	0.59
1679.74	4.487	194.733	0.61
1680.73	4.269	185.272	0.6
1681.72	4.287	186.053	0.68
1681.92	4.893	212.353	0.88
1682.27	4.918	213.438	0.89
1682.83	4.85	210.487	0.91
1682.84	5.143	223.203	0.95
1683.29	4.354	188.961	0.67
1683.7	5.524	239.738	0.99
1683.8	5.497	238.567	0.97
1686.86	5.91	256.491	1.07
1749.99	5.026	218.125	0.44
1750.23	5.058	219.514	0.5
1750.34	5.357	232.491	0.36
1750.59	5.006	217.257	0.47
1774.76	4.434	192.433	0.6
1775.85	4.577	198.639	0.66
1776.73	4.783	207.579	0.71
1776.97	4.517	196.035	0.67
1778.64	4.65	201.807	0.7
1779.85	4.726	205.106	0.7
1779.86	4.712	204.498	0.74
1779.87	4.969	215.652	0.86
1779.88	4.643	201.503	0.71
1779.89	4.473	194.126	0.67
1779.98	4.707	204.281	0.69
1780.28	4.739	205.67	0.76
1780.37	4.739	205.67	0.73
1780.43	5.015	217.648	0.82
1780.47	4.712	204.498	0.73
1780.57	4.749	206.104	0.67
1780.71	4.765	206.798	0.76
1780.75	4.705	204.194	0.73
1780.85	4.845	210.27	0.8
1781.04	5.091	220.946	0.91
1781.46	4.691	203.587	0.76
1781.46	4.694	203.717	0.7
1781.68	5.042	218.82	0.97
1781.72	5.088	220.816	0.92
1781.82	5.249	227.804	0.71
1781.84	5.511	239.174	1.02
1781.85	4.696	203.804	0.71
1781.93	5.102	221.424	1.01
1782.42	5.43	235.659	0.81
1782.44	4.464	193.735	0.73
1782.44	5.166	224.201	0.99
1783.34	5.405	234.574	1.01
1806.08	5.926	257.185	1.08
1822.11	4.707	204.281	0.47
1826.56	4.613	200.202	0.65
1831.33	5.655	245.424	1.03
1874.62	4.801	208.361	0.41
1877.15	4.384	190.263	0.64
1877.49	4.377	189.959	0.61
1877.58	4.517	196.035	0.76
1878.38	5.139	223.03	1.02
1879.24	5.13	222.639	0.9
1879.67	5.164	224.115	0.97
1880.05	5.047	219.037	0.91
1880.7	5.609	243.427	1.06
1881.9	5.589	242.559	1.06
1965.57	4.547	197.337	0.63
1971.7	4.783	207.579	0.72
1972.28	4.492	194.95	0.5
1973.22	4.687	203.413	0.55
1973.43	5.609	243.427	0.89
1973.59	4.652	201.894	0.61
1974.06	5.068	219.948	0.81
1974.96	4.622	200.592	0.68
1975.15	4.953	214.957	0.79
1975.85	5.006	217.257	0.8
1975.92	4.997	216.867	0.81
1976.35	4.921	213.569	0.75
1976.48	4.861	210.965	0.78
1976.7	5.345	231.97	0.9
1976.92	4.957	215.131	0.82
1977.07	4.652	201.894	0.71
1977.23	5.123	222.335	0.9
1977.53	4.997	216.867	0.81
1977.71	5.472	237.482	0.95
1977.77	4.999	216.954	0.83
1977.82	5.008	217.344	0.8
1978.02	4.921	213.569	0.8
1978.02	4.967	215.565	0.81
1978.02	4.971	215.739	0.77
1978.06	5.341	231.796	0.99
1978.21	4.673	202.805	0.73
1978.61	4.953	214.957	0.77
1978.81	5.373	233.185	0.96
1979.19	5.185	225.026	0.97
1979.3	4.923	213.655	0.71
1979.68	5.127	222.509	0.86
1980.04	5.655	245.424	1.04
1980.18	5.015	217.648	0.73
1980.43	5.667	245.944	1.06
1999.67	5.13	222.639	0.58
2000.02	5.091	220.946	0.43
2000.53	5.132	222.726	0.63
2000.94	5.139	223.03	0.49
2022.98	4.714	204.585	0.74
2050.32	6.224	270.118	0.58
2054.56	5.958	258.574	1.11
2072.07	4.664	202.415	0.63
2072.45	4.551	197.511	0.7
2074.96	4.873	211.485	0.85
2078.2	5.357	232.491	1.03
2078.47	5.279	229.106	0.97
2100.22	6.364	276.194	0.74
2123.83	4.774	207.189	0.46
2125.56	5.279	229.106	0.92
2127.07	5.625	244.122	1.02
2146.29	6.429	279.015	0.7
2172.03	4.735	205.496	0.8
2172.7	5.628	244.252	1.03
2173.12	5.139	223.03	0.8
2173.51	5.063	219.731	0.84
2173.51	5.258	228.194	0.84
2173.71	5.137	222.943	0.8
2173.79	5.394	234.096	0.94
2173.85	5.022	217.952	0.81
2173.91	5.132	222.726	0.81
2173.91	5.203	225.807	0.84
2174	5.238	227.326	0.79
2174.08	5.148	223.42	0.85
2174.14	5.217	226.415	0.93
2174.2	5.093	221.033	0.81
2174.41	5.219	226.502	0.9
2174.5	5.091	220.946	0.84
2174.5	5.215	226.328	0.88
2174.6	5.091	220.946	0.82
2174.82	5.286	229.409	1.03
2174.99	5.201	225.72	0.87
2175.19	5.203	225.807	0.88
2175.35	5.951	258.27	1.15
2175.41	5.435	235.876	1.01
2175.58	5.621	243.948	1
2175.64	5.185	225.026	0.86
2175.68	4.861	210.965	0.78
2175.81	5.676	246.335	1.03
2175.91	5.676	246.335	1.01
2249.59	5.198	225.59	0.5
2250.15	5.224	226.719	0.54
2267.37	4.652	201.894	0.56
2267.79	4.712	204.498	0.62
2267.81	4.85	210.487	0.46
2272.31	5.26	228.281	0.94
2274.19	5.605	243.254	1.02
2274.27	5.26	228.281	0.94
2274.49	5.63	244.339	1.02
2288.39	5.187	225.113	0.81
2296.46	5.988	259.876	1.13
2299	5.329	231.275	0.92
2318.88	4.753	206.277	0.66
2369.08	5.18	224.809	0.82
2369.6	5.552	240.954	0.99
2369.71	5.249	227.804	0.86
2369.79	5.713	247.941	1
2369.81	5.394	234.096	0.94
2370.01	5.155	223.724	0.84
2370.01	5.391	233.966	0.84
2370.02	5.095	221.12	0.91
2370.11	5.221	226.588	0.84
2370.52	5.277	229.019	0.88
2370.55	5.118	222.118	0.81
2370.72	5.713	247.941	1
2370.79	5.263	228.411	0.86
2370.97	5.304	230.191	0.86
2371.58	5.394	234.096	0.92
2371.87	5.433	235.789	0.93
2371.88	5.224	226.719	0.85
2373.45	5.29	229.583	0.96
2398.56	5.731	248.722	0.98
2420.61	5.364	232.794	0.92
2461.02	5.343	231.883	0.89
2463.12	5.288	229.496	0.88
2463.42	5.134	222.813	0.73
2464.2	4.983	216.259	0.2
2465.44	5.527	239.869	0.95
2466.31	4.99	216.563	0.78
2467.53	5.042	218.82	0.88
2469.43	5.458	236.874	0.81
2470.67	5.304	230.191	0.97
2473.61	5.625	244.122	0.96
2499.1	5.249	227.804	0.64
2500.23	5.258	228.194	0.54
2500.28	5.396	234.183	0.53
2500.56	5.24	227.413	0.67
2544.86	5.999	260.353	1.15
2560.5	5.215	226.328	0.78
2561.52	4.742	205.8	0.56
2561.56	4.753	206.277	0.51
2563.29	4.677	202.979	0.58
2565.75	5.233	227.109	0.85
2566.03	5.559	241.257	0.94
2566.4	5.417	235.095	0.92
2566.43	5.355	232.404	0.98
2566.67	5.194	225.417	0.83
2566.75	5.297	229.887	0.89
2566.82	5.334	231.492	0.88
2567.15	5.747	249.416	1.01
2567.19	5.752	249.633	0.99
2567.21	5.543	240.563	0.94
2567.29	5.754	249.72	1.01
2567.5	5.522	239.652	0.97
2567.6	5.543	240.563	0.94
2568.38	5.127	222.509	0.81
2568.58	5.316	230.711	0.87
2568.68	5.35	232.187	0.89
2569.93	5.671	246.118	1.03
2612.32	4.723	204.975	0.6
2661.42	4.84	210.053	0.45
2662.15	4.937	214.263	0.79
2664.18	5.226	226.805	0.9
2664.81	5.173	224.505	0.86
2666.06	5.99	259.963	1.15
2666.94	5.524	239.738	0.99
2667.84	5.568	241.648	0.92
2748.59	5.357	232.491	0.55
2749.68	5.355	232.404	0.44
2750.08	5.373	233.185	0.53
2751.02	5.504	238.87	0.45
2754.53	5.201	225.72	0.66
2757.16	4.776	207.276	0.46
2761.17	5.166	224.201	0.85
2761.36	5.132	222.726	0.81
2761.4	5.263	228.411	0.84
2762.17	5.655	245.424	0.97
2762.32	5.332	231.406	0.89
2762.4	5.295	229.8	0.89
2762.56	5.228	226.892	0.84
2762.75	5.607	243.341	1
2762.8	5.589	242.559	0.96
2763.01	5.251	227.89	0.82
2763.01	5.752	249.633	1.01
2763.25	5.389	233.879	0.87
2763.44	5.384	233.662	0.88
2763.64	5.423	235.355	0.91
2763.74	5.394	234.096	0.87
2763.91	5.511	239.174	0.92
2764.13	5.637	244.643	1.01
2764.7	5.754	249.72	1.02
2764.79	5.715	248.028	1.03
2765.33	5.341	231.796	0.95
2766.4	5.614	243.644	0.97
2766.55	5.361	232.664	0.94
2775.71	4.85	210.487	0.53
2790.82	5.99	259.963	1.14
2856.16	4.756	206.408	0.52
2856.72	4.733	205.409	0.56
2863.06	5.417	235.095	0.95
2905.75	4.767	206.885	0.63
2952.13	5.456	236.787	0.88
2953.14	5.568	241.648	0.98
2954.53	4.962	215.348	0.73
2954.72	5.658	245.554	1.01
2958.33	5.32	230.885	0.98
2959.07	5.357	232.491	0.87
2959.1	5.646	245.033	1
2959.69	5.646	245.033	0.97
2959.69	5.687	246.812	0.98
2960.38	5.472	237.482	0.9
2960.52	5.4	234.357	0.93
2960.77	5.435	235.876	0.9
2961.33	5.524	239.738	0.95
2999.85	5.405	234.574	0.29
2999.91	5.373	233.185	0.62
3000.24	5.387	233.793	0.43
3000.88	5.322	230.972	0.59
3000.89	5.527	239.869	0.59
3031.01	6.064	263.174	1.13
3047.2	4.939	214.35	0.61
3051.58	4.845	210.27	0.48
3053.52	5.224	226.719	0.88
3056.79	5.231	227.022	0.89
3059.39	5.27	228.715	0.9
3059.98	5.524	239.738	0.97
3148.24	4.79	207.883	0.53
3150.3	5.596	242.863	0.68
3150.63	4.76	206.581	0.54
3153.22	5.648	245.12	0.96
3154.38	6.066	263.261	1.13
3159.92	5.355	232.404	0.93
3200.21	5.398	234.27	0.51
3202.24	5.635	244.556	0.96
3202.3	5.26	228.281	0.86
3202.73	5.729	248.635	0.95
3202.96	5.288	229.496	0.82
3202.99	5.263	228.411	0.83
3203.09	5.359	232.577	0.85
3203.26	5.685	246.726	0.96
3203.71	5.398	234.27	0.88
3203.8	5.676	246.335	0.98
3203.81	5.492	238.35	0.9
3204.1	5.46	236.961	0.91
3204.17	5.625	244.122	0.97
3204.49	5.731	248.722	0.99
3204.78	5.435	235.876	0.88
3204.98	5.543	240.563	0.85
3205.15	5.781	250.892	1.03
3248.18	4.976	215.955	0.72
3249.57	5.474	237.568	0.5
3250.11	5.485	238.046	0.4
3250.28	5.82	252.585	0.71
3251.01	5.543	240.563	0.62
3253.85	5.332	231.406	0.93
3254.9	5.332	231.406	0.94
3258.98	6.066	263.261	1.12
3316.11	5.405	234.574	0.42
3332.38	5.217	226.415	0.77
3342.42	4.774	207.189	0.51
3347.53	5.221	226.588	0.8
3351.56	5.357	232.491	1.08
3400.01	6.328	274.632	0.74
3439.07	5.072	220.122	0.68
3440.24	5.543	240.563	0.87
3441.75	4.756	206.408	0.27
3442.28	4.852	210.574	0.5
3443.46	4.808	208.664	0.51
3446.8	5.609	243.427	0.87
3447.25	5.407	234.661	0.89
3447.33	5.341	231.796	0.86
3447.43	5.338	231.666	0.84
3447.45	5.446	236.353	0.85
3447.45	5.637	244.643	0.95
3447.69	5.258	228.194	0.82
3447.74	5.481	237.872	0.85
3447.75	6.38	276.888	0.87
3448.27	5.598	242.95	0.9
3448.72	5.527	239.869	0.86
3448.72	5.586	242.429	0.88
3448.94	5.456	236.787	0.8
3449.01	5.414	234.964	0.84
3449.08	5.281	229.192	0.81
3449.41	5.327	231.189	0.73
3449.57	5.563	241.431	0.91
3449.79	5.481	237.872	0.83
3449.87	5.715	248.028	0.96
3451.08	5.584	242.342	0.97
3451.76	5.26	228.281	0.88
3452.88	5.589	242.559	0.95
3491.63	4.845	210.27	0.55
3500.08	5.501	238.74	0.32
3500.48	5.407	234.661	0.68
3500.48	5.52	239.565	0.59
3500.78	5.41	234.791	0.64
3542.22	4.9	212.657	0.63
3551.51	5.293	229.713	0.85
3601.39	5.543	240.563	0.47
3631.38	4.811	208.795	0.46
3646.94	4.909	213.048	0.53
3647.6	5.341	231.796	0.92
3650.03	5.602	243.124	0.69
3683.01	5.518	239.478	0.85
3689.24	5.281	229.192	0.85
3692.19	5.412	234.878	0.9
3692.24	5.127	222.509	0.64
3692.26	5.501	238.74	0.86
3692.29	5.387	233.793	0.87
3692.29	5.419	235.181	0.84
3692.87	5.439	236.049	0.78
3692.95	5.215	226.328	0.79
3692.97	5.405	234.574	0.9
3693.13	5.141	223.116	0.73
3694.14	5.474	237.568	0.86
3708.2	5.456	236.787	0.89
3734.73	4.843	210.183	0.47
3738.91	5.104	221.511	0.72
3741.72	5.32	230.885	0.89
3750.23	5.511	239.174	0.79
3750.27	5.559	241.257	0.53
3750.38	5.628	244.252	0.73
3750.73	5.621	243.948	0.64
3774.58	5.026	218.125	0.54
3783.59	4.886	212.05	0.54
3799.81	5.648	245.12	0.7
3800.01	5.589	242.559	0.56
3833.04	4.907	212.961	0.64
3838.71	5.242	227.5	0.84
3840.89	5.031	218.342	0.68
3844.5	5.602	243.124	0.96
3850.12	5.582	242.256	0.55
3855.16	5.658	245.554	0.68
3872.85	5.029	218.256	0.54
3902.46	5.563	241.431	0.36
3904.37	4.898	212.57	0.42
3916.97	5.403	234.487	0.88
3927.24	5.173	224.505	0.65
3929.37	4.928	213.872	0.18
3929.8	4.948	214.74	0.53
3932.51	5.029	218.256	0.66
3935.29	5.341	231.796	0.75
3935.68	5.38	233.489	0.88
3935.75	5.428	235.572	0.82
3935.84	5.187	225.113	0.63
3936.14	5.43	235.659	0.79
3936.55	5.091	220.946	0.7
3936.95	5.366	232.881	0.88
3937.02	5.052	219.254	0.64
3937.18	5.316	230.711	0.7
3937.55	5.616	243.731	0.88
3938.02	5.375	233.272	0.85
3939.75	5.545	240.65	0.92
3940.65	5.293	229.713	0.9
3950.79	4.873	211.485	0.49
3999.65	5.577	242.039	0.46
4000.97	5.341	231.796	0.73
4001.06	5.338	231.666	0.73
4001.36	5.522	239.652	0.67
4036.87	5.332	231.406	0.98
4057.09	4.852	210.574	0.44
4082.2	5.072	220.122	0.56
4100.3	5.582	242.256	0.61
4113.23	5.143	223.203	0.62
4126.98	4.896	212.484	0.56
4128.52	4.997	216.867	0.64
4132.74	5.318	230.798	0.93
4149.91	5.579	242.125	0.4
4177.81	5.164	224.115	0.63
4178.6	5.008	217.344	0.54
4178.81	5.233	227.109	0.68
4179.01	5.355	232.404	0.87
4179.03	5.251	227.89	0.65
4179.13	5.254	228.021	0.66
4179.36	5.355	232.404	0.77
4179.98	5.352	232.274	0.86
4180.17	5.019	217.822	0.63
4180.18	5.198	225.59	0.65
4213.02	5.056	219.427	0.48
4230.23	5.357	232.491	0.87
4232.08	5.345	231.97	0.87
4232.43	5.515	239.348	0.92
4233.87	5.561	241.344	0.94
4250.68	5.713	247.941	0.65
4329.98	5.334	231.492	0.92
4335.49	5.226	226.805	0.61
4346.51	5.029	218.256	0.49
4393.23	4.879	211.746	0.5
4399.49	5.579	242.125	0.48
4400.23	5.616	243.731	0.61
4415.92	5.068	219.948	0.37
4421.87	4.992	216.65	0.6
4422.36	5.327	231.189	0.8
4422.75	5.176	224.635	0.65
4422.85	5.194	225.417	0.65
4423.23	5.327	231.189	0.79
4423.53	5.196	225.503	0.68
4424.17	5.309	230.408	0.71
4469.78	4.978	216.042	0.69
4485.33	5.32	230.885	0.88
4499.95	5.593	242.733	0.55
4502.75	5.577	242.039	0.6
4503.59	5.529	239.955	0.62
4510.57	5.116	222.031	0.41
4518.32	4.983	216.259	0.6
4550	5.674	246.248	0.57
4589.01	5.299	229.974	0.68
4599.48	5.639	244.729	0.7
4600.09	5.692	247.029	0.62
4625.18	5.545	240.65	0.92
4636.79	4.955	215.044	0.58
4649.78	5.706	247.637	0.53
4660.33	5.669	246.031	0.71
4665.15	5.153	223.637	0.63
4698.79	5.699	247.333	0.64
4703.53	5.306	230.277	0.82
4720.09	5.371	233.098	0.84
4729.97	4.98	216.129	0.57
4749.89	5.765	250.198	0.64
4753.73	4.974	215.869	0.56
4797.04	5.155	223.724	0.5
4814.45	5.4	234.357	0.91
4899.24	5.614	243.644	0.68
4908.95	4.98	216.129	0.55
4909.14	5.137	222.943	0.62
4909.24	4.983	216.259	0.54
4955.85	4.971	215.739	0.58
4999.73	5.63	244.339	0.77
5004.02	5.775	250.632	0.66
5005.82	5.563	241.431	0.67
5049.57	5.641	244.816	0.7
5099.4	5.658	245.554	1.01
5106.52	4.98	216.129	0.58
5107.23	5.543	240.563	0.95
5108.07	5.453	236.657	0.88
5150.54	5.12	222.205	0.62
5151.22	5.118	222.118	0.64
5156.55	5.772	250.501	0.57
5203.26	5.394	234.096	0.97
5206.53	5.772	250.501	0.57
5236.24	5.137	222.943	0.47
5256.41	5.775	250.632	0.59
5265.33	5.116	222.031	0.62
5301.44	5.761	250.024	0.53
5366.96	5.609	243.427	0.61
5394.08	5.412	234.878	0.97
5466.67	5.625	244.122	0.65
5499.46	5.384	233.662	0.94
5516.7	5.637	244.643	0.69
5566.43	5.653	245.337	0.65
5661.59	5.405	234.574	0.89
